# Supplementary material for: SQSTM1/p62 Protein Oxidation Facilitates Nrf2 Activation and Pro-survival Autophagy under Therapeutic Oxidative Stress
Source: Research Square preprint supplement (doi:10.21203/rs.3.rs-8586285/v1), 2026-01-20
Supplement: Supplementary file 1 [file bcafe2cbe9929b537df0f522.xlsx]

## Sheet: Alternol-PC3Xeno-RNAseq
GeneID	Length	Control-Expression	Treatment-Expression	log2FC(Treatment/Control)	Padj	Up/Down-Regulation	Pvalue	Symbol	Cellular Component	Molecular Function	Biological Process	Kegg Orthology	Nr Description
3576	1718	87.6461	735.832	3.06961	8.25e-148	Up	4.41e-151	CXCL8	GO:0005615//extracellular space;GO:0005622//intracellular	GO:0005153//interleukin-8 receptor binding;GO:0008009//chemokine activity	GO:0050930//induction of positive chemotaxis;GO:0031623//receptor internalization;GO:0071222//cellular response to lipopolysaccharide;GO:0045744//negative regulation of G-protein coupled receptor protein signaling pathway;GO:0071356//cellular response to tumor necrosis factor;GO:0007050//cell cycle arrest;GO:0071347//cellular response to interleukin-1;GO:0006987//activation of signaling protein a…	K10030//interleukin 8	gi|10834978|ref|NP_000575.1|//interleukin-8 precursor [Homo sapiens]
1543	2701	15.2241	120.943	2.9899	4.64e-29	Up	4.36e-31	CYP1A1	GO:0031090//organelle membrane;GO:0005739//mitochondrion;GO:0005789//endoplasmic reticulum membrane	GO:0008395//steroid hydroxylase activity;GO:0020037//heme binding;GO:0005506//iron ion binding;GO:0016679//oxidoreductase activity, acting on diphenols and related substances as donors;GO:0019825//oxygen binding;GO:0070576//vitamin D 24-hydroxylase activity;GO:0070330//aromatase activity;GO:0016711//flavonoid 3'-monooxygenase activity;GO:0032451//demethylase activity;GO:0019899//enzyme binding	GO:0043010//camera-type eye development;GO:0042904//9-cis-retinoic acid biosynthetic process;GO:0046677//response to antibiotic;GO:0046685//response to arsenic-containing substance;GO:0033189//response to vitamin A;GO:0009611//response to wounding;GO:0042493//response to drug;GO:0006778//porphyrin-containing compound metabolic process;GO:0019341//dibenzo-p-dioxin catabolic process;GO:0010041//res…	K07408//cytochrome P450, family 1, subfamily A, polypeptide 1 [EC:1.14.14.1]	gi|34595949|gb|AAQ76692.1|//cytochrome P450 1A1 variant [Homo sapiens];gi|984655756|ref|NP_001306145.1|//cytochrome P450 1A1 isoform 2 [Homo sapiens];gi|4503199|ref|NP_000490.1|//cytochrome P450 1A1 isoform 1 [Homo sapiens]
3552	2947	15.2935	114.464	2.90391	3.17e-26	Up	3.8e-28	IL1A	GO:0005615//extracellular space;GO:0005829//cytosol	GO:0005125//cytokine activity;GO:0005507//copper ion binding;GO:0005149//interleukin-1 receptor binding	GO:0010575//positive regulation vascular endothelial growth factor production;GO:0001660//fever generation;GO:0043066//negative regulation of apoptotic process;GO:0051781//positive regulation of cell division;GO:0034605//cellular response to heat;GO:0046688//response to copper ion;GO:0045086//positive regulation of interleukin-2 biosynthetic process;GO:0045944//positive regulation of transcriptio…	K04383//interleukin 1 alpha	gi|27894330|ref|NP_000566.3|//interleukin-1 alpha precursor [Homo sapiens]
26291	1333	17.1064	120.708	2.81892	1.3e-27	Up	1.37e-29	FGF21	GO:0005615//extracellular space;GO:0005623//cell	GO:0008083//growth factor activity;GO:0005104//fibroblast growth factor receptor binding	GO:0046326//positive regulation of glucose import;GO:0045716//positive regulation of low-density lipoprotein particle receptor biosynthetic process;GO:0007267//cell-cell signaling;GO:0070374//positive regulation of ERK1 and ERK2 cascade;GO:0010988//regulation of low-density lipoprotein particle clearance	K04358//fibroblast growth factor	gi|9506597|ref|NP_061986.1|//fibroblast growth factor 21 precursor [Homo sapiens]
3569	1233	142.337	818.822	2.52424	7.52e-137	Up	4.46e-140	IL6	GO:0005615//extracellular space;GO:0009897//external side of plasma membrane;GO:0005896//interleukin-6 receptor complex;GO:0005737//cytoplasm	GO:0005138//interleukin-6 receptor binding;GO:0008083//growth factor activity;GO:0005125//cytokine activity	GO:0045079//negative regulation of chemokine biosynthetic process;GO:0002675//positive regulation of acute inflammatory response;GO:0051971//positive regulation of transmission of nerve impulse;GO:0045666//positive regulation of neuron differentiation;GO:2000366//positive regulation of STAT protein import into nucleus;GO:0045188//regulation of circadian sleep/wake cycle, non-REM sleep;GO:0070102/…	K05405//interleukin 6	gi|530384757|ref|XP_005249802.1|//PREDICTED: interleukin-6 isoform X2 [Homo sapiens];gi|10834984|ref|NP_000591.1|//interleukin-6 isoform 1 precursor [Homo sapiens];gi|969812510|ref|NP_001305024.1|//interleukin-6 isoform 2 [Homo sapiens]
9076	3452	23.4986	99.0494	2.07558	1.09e-15	Up	3.39e-17	CLDN1	GO:0005887//integral component of plasma membrane;GO:0016324//apical plasma membrane;GO:0005923//tight junction;GO:0016328//lateral plasma membrane	GO:0042802//identical protein binding;GO:0005198//structural molecule activity;GO:0001618//virus receptor activity	GO:0045216//cell-cell junction organization;GO:0016338//calcium-independent cell-cell adhesion via plasma membrane cell-adhesion molecules;GO:0019048//modulation by virus of host morphology or physiology	K06087//claudin	gi|10863887|ref|NP_066924.1|//claudin-1 [Homo sapiens]
2921	1166	23.5815	98.3412	2.06014	4.46e-15	Up	1.48e-16	CXCL3	GO:0005615//extracellular space	GO:0045236//CXCR chemokine receptor binding;GO:0008009//chemokine activity	GO:0030593//neutrophil chemotaxis;GO:0006955//immune response;GO:0006954//inflammatory response	K05505//C-X-C motif chemokine 1/2/3	gi|54144650|ref|NP_002081.2|//C-X-C motif chemokine 3 precursor [Homo sapiens]
90853	2578	30.3838	124.363	2.03319	1.45e-18	Up	3.36e-20	SPOCD1	NA	NA	GO:0010923//negative regulation of phosphatase activity;GO:0006351//transcription, DNA-templated	K17596//SPOC domain-containing protein 1	gi|767906695|ref|XP_011540711.1|//PREDICTED: SPOC domain-containing protein 1 isoform X4 [Homo sapiens];gi|767906699|ref|XP_011540713.1|//PREDICTED: SPOC domain-containing protein 1 isoform X6 [Homo sapiens];gi|47271475|ref|NP_653170.3|//SPOC domain-containing protein 1 isoform 1 [Homo sapiens];gi|767906697|ref|XP_011540712.1|//PREDICTED: SPOC domain-containing protein 1 isoform X5 [Homo sapiens]…
2069	4628	73.0577	298.574	2.03098	8.37e-40	Up	5.12e-42	EREG	GO:0005615//extracellular space;GO:0005887//integral component of plasma membrane;GO:0005622//intracellular	GO:0004713//protein tyrosine kinase activity;GO:0008083//growth factor activity;GO:0005088//Ras guanyl-nucleotide exchange factor activity;GO:0005154//epidermal growth factor receptor binding;GO:0046934//phosphatidylinositol-4,5-bisphosphate 3-kinase activity	GO:0043616//keratinocyte proliferation;GO:0030216//keratinocyte differentiation;GO:0045089//positive regulation of innate immune response;GO:0051151//negative regulation of smooth muscle cell differentiation;GO:0051781//positive regulation of cell division;GO:0001819//positive regulation of cytokine production;GO:0030728//ovulation;GO:0042700//luteinizing hormone signaling pathway;GO:0001550//ova…	K09784//epiregulin	gi|4557567|ref|NP_001423.1|//proepiregulin preproprotein [Homo sapiens]
6364	848	5.47937	21.7439	1.98853	2.44e-06	Up	2.54e-07	CCL20	GO:0005615//extracellular space	GO:0008009//chemokine activity;GO:0048020//CCR chemokine receptor binding	GO:0007165//signal transduction;GO:0006955//immune response;GO:0007267//cell-cell signaling;GO:0006935//chemotaxis;GO:0042466//chemokinesis;GO:0042742//defense response to bacterium;GO:0006954//inflammatory response	K14625//C-C motif chemokine 20	gi|4759076|ref|NP_004582.1|//C-C motif chemokine 20 isoform 1 precursor [Homo sapiens];gi|194239688|ref|NP_001123518.1|//C-C motif chemokine 20 isoform 2 precursor [Homo sapiens]
2920	1234	67.882	268.627	1.9845	4.12e-37	Up	2.86e-39	CXCL2	GO:0005615//extracellular space	GO:0045236//CXCR chemokine receptor binding;GO:0008009//chemokine activity	GO:0006955//immune response;GO:0006935//chemotaxis;GO:0002237//response to molecule of bacterial origin;GO:0006954//inflammatory response	K05505//C-X-C motif chemokine 1/2/3	gi|4504155|ref|NP_002080.1|//C-X-C motif chemokine 2 precursor [Homo sapiens]
4314	1906	2.3728	8.59035	1.85613	6.01e-05	Up	8.16e-06	MMP3	GO:0005615//extracellular space;GO:0005578//proteinaceous extracellular matrix	GO:0004252//serine-type endopeptidase activity;GO:0004222//metalloendopeptidase activity;GO:0005515//protein binding;GO:0005509//calcium ion binding;GO:0008270//zinc ion binding	GO:0022617//extracellular matrix disassembly;GO:0006508//proteolysis;GO:0030334//regulation of cell migration;GO:0030574//collagen catabolic process;GO:0071230//cellular response to amino acid stimulus	K01394//matrix metalloproteinase-3 (stromelysin 1, progelatinase) [EC:3.4.24.17]	gi|4505217|ref|NP_002413.1|//stromelysin-1 preproprotein [Homo sapiens]
83729	2453	57.2369	204.521	1.83723	6.66e-25	Up	9.01e-27	INHBE	GO:0005615//extracellular space	GO:0008083//growth factor activity;GO:0005125//cytokine activity;GO:0005160//transforming growth factor beta receptor binding;GO:0005179//hormone activity	GO:0040007//growth	K04667//inhibin, beta	gi|13899338|ref|NP_113667.1|//inhibin beta E chain precursor [Homo sapiens]
1649	947	221.787	785.23	1.82394	4.86e-83	Up	8.65e-86	DDIT3	GO:0005654//nucleoplasm;GO:0005770//late endosome;GO:1990622//null;GO:0043204//perikaryon;GO:0044327//dendritic spine head;GO:0048471//perinuclear region of cytoplasm;GO:1990617//null;GO:0035976//AP1 complex;GO:0005829//cytosol;GO:0036488//CHOP-C/EBP complex;GO:0032993//protein-DNA complex;GO:0005844//polysome	GO:0000978//RNA polymerase II core promoter proximal region sequence-specific DNA binding;GO:0008140//cAMP response element binding protein binding;GO:0030331//estrogen receptor binding;GO:0003714//transcription corepressor activity;GO:0046966//thyroid hormone receptor binding;GO:0046982//protein heterodimerization activity;GO:0001077//RNA polymerase II core promoter proximal region sequence-spec…	GO:0043433//negative regulation of sequence-specific DNA binding transcription factor activity;GO:0007050//cell cycle arrest;GO:0042789//mRNA transcription from RNA polymerase II promoter;GO:0045454//cell redox homeostasis;GO:0090090//negative regulation of canonical Wnt signaling pathway;GO:0006987//activation of signaling protein activity involved in unfolded protein response;GO:0006974//cellul…	K04452//DNA damage-inducible transcript 3	gi|304282225|ref|NP_001181982.1|//DNA damage-inducible transcript 3 protein isoform 1 [Homo sapiens];gi|386159|gb|AAB27103.1|//TLS-CHOP [Homo sapiens]
645426	1325	2.31602	7.9844	1.78554	0.000117337	Up	1.69e-05	TMEM191C	GO:0016021//integral component of membrane	NA	NA	NA	gi|333440473|ref|NP_001193981.1|//transmembrane protein 191C [Homo sapiens]
3553	1498	3.32961	11.2793	1.76025	0.000156753	Up	2.33e-05	IL1B	GO:0070062//extracellular vesicular exosome;GO:0005615//extracellular space;GO:0030141//secretory granule;GO:0005829//cytosol;GO:0005764//lysosome;GO:0005776//autophagic vacuole	GO:0005125//cytokine activity;GO:0019904//protein domain specific binding;GO:0005149//interleukin-1 receptor binding	GO:0046330//positive regulation of JNK cascade;GO:0035690//cellular response to drug;GO:0071260//cellular response to mechanical stimulus;GO:0043407//negative regulation of MAP kinase activity;GO:0042102//positive regulation of T cell proliferation;GO:0043491//protein kinase B signaling;GO:0032308//positive regulation of prostaglandin secretion;GO:0033129//positive regulation of histone phosphory…	K04519//interleukin 1 beta	gi|119594013|gb|EAW73607.1|//interleukin 1, beta, isoform CRA_c [Homo sapiens]
10170	1804	2.65928	8.96848	1.75383	0.000174601	Up	2.63e-05	DHRS9	GO:0030176//integral component of endoplasmic reticulum membrane;GO:0031090//organelle membrane	GO:0004022//alcohol dehydrogenase (NAD) activity;GO:0004745//retinol dehydrogenase activity;GO:0016854//racemase and epimerase activity;GO:0047035//testosterone dehydrogenase (NAD+) activity	GO:0042904//9-cis-retinoic acid biosynthetic process;GO:0008209//androgen metabolic process;GO:0042448//progesterone metabolic process;GO:0042572//retinol metabolic process;GO:0030855//epithelial cell differentiation	K11149//dehydrogenase/reductase SDR family member 9 [EC:1.1.-.-]	gi|576796343|ref|NP_001276692.1|//dehydrogenase/reductase SDR family member 9 isoform 2 [Homo sapiens]
467	2024	200.63	675.741	1.75193	9.22e-74	Up	2.08e-76	ATF3	GO:0005654//nucleoplasm;GO:0005730//nucleolus;GO:1990622//null	GO:0000978//RNA polymerase II core promoter proximal region sequence-specific DNA binding;GO:0001228//RNA polymerase II transcription regulatory region sequence-specific DNA binding transcription factor activity involved in positive regulation of transcription;GO:0003714//transcription corepressor activity;GO:0046982//protein heterodimerization activity;GO:0042803//protein homodimerization activi…	GO:0045892//negative regulation of transcription, DNA-templated;GO:0006094//gluconeogenesis;GO:0006987//activation of signaling protein activity involved in unfolded protein response;GO:0008284//positive regulation of cell proliferation	K09032//activating transcription factor 3	gi|330417916|ref|NP_001193415.1|//cyclic AMP-dependent transcription factor ATF-3 isoform 5 [Homo sapiens];gi|346223458|ref|NP_001193413.2|//cyclic AMP-dependent transcription factor ATF-3 isoform 3 [Homo sapiens];gi|4502263|ref|NP_001665.1|//cyclic AMP-dependent transcription factor ATF-3 isoform 1 [Homo sapiens];gi|95102483|ref|NP_001035709.1|//cyclic AMP-dependent transcription factor ATF-3 is…
8870	1254	797.662	2654.38	1.73453	4.1e-239	Up	7.3e-243	IER3	GO:0005634//nucleus;GO:0005829//cytosol;GO:0016021//integral component of membrane	GO:0005515//protein binding	GO:0009653//anatomical structure morphogenesis;GO:0003085//negative regulation of systemic arterial blood pressure;GO:0043066//negative regulation of apoptotic process;GO:2001020//regulation of response to DNA damage stimulus;GO:0050728//negative regulation of inflammatory response;GO:0043065//positive regulation of apoptotic process;GO:0045732//positive regulation of protein catabolic process;GO…	NA	gi|119964723|ref|NP_003888.2|//radiation-inducible immediate-early gene IEX-1 [Homo sapiens]
285848	2611	23.007	74.6545	1.69816	4.79e-10	Up	2.79e-11	PNPLA1	GO:0005737//cytoplasm	GO:0016787//hydrolase activity	GO:0016042//lipid catabolic process	K16813//patatin-like phospholipase domain-containing protein 1 [EC:3.1.1.-]	gi|224589138|ref|NP_001139188.1|//patatin-like phospholipase domain-containing protein 1 isoform 2 [Homo sapiens];gi|767939811|ref|XP_011512821.1|//PREDICTED: patatin-like phospholipase domain-containing protein 1 isoform X1 [Homo sapiens];gi|238776840|ref|NP_001139189.2|//patatin-like phospholipase domain-containing protein 1 isoform 3 [Homo sapiens]
22822	5913	437.31	1413.72	1.69277	3.85e-131	Up	2.75e-134	PHLDA1	GO:0005730//nucleolus;GO:0005829//cytosol	GO:0005515//protein binding	GO:0045210//FasL biosynthetic process	K19008//serine/threonine-protein kinase SIK1 [EC:2.7.11.1];K19346//nesprin-2	gi|83977459|ref|NP_031376.3|//pleckstrin homology-like domain family A member 1 [Homo sapiens]
1843	2040	424.949	1331.38	1.64756	1.99e-102	Up	2.71e-105	DUSP1	GO:0005634//nucleus;GO:0005737//cytoplasm	GO:0004726//non-membrane spanning protein tyrosine phosphatase activity;GO:0008330//protein tyrosine/threonine phosphatase activity;GO:0017017//MAP kinase tyrosine/serine/threonine phosphatase activity;GO:0019838//growth factor binding	GO:0001706//endoderm formation;GO:0009416//response to light stimulus;GO:0051591//response to cAMP;GO:0000188//inactivation of MAPK activity;GO:0032526//response to retinoic acid;GO:0032870//cellular response to hormone stimulus;GO:0042542//response to hydrogen peroxide;GO:0051592//response to calcium ion;GO:0043065//positive regulation of apoptotic process;GO:0032355//response to estradiol;GO:00…	K21278//null	gi|4758204|ref|NP_004408.1|//dual specificity protein phosphatase 1 [Homo sapiens]
51200	2802	50.9807	159.315	1.64386	1.37e-17	Up	3.57e-19	CPA4	GO:0005615//extracellular space	GO:0004181//metallocarboxypeptidase activity;GO:0008270//zinc ion binding	GO:0006508//proteolysis;GO:0016573//histone acetylation	K08637//carboxypeptidase A4 [EC:3.4.17.-]	gi|254540196|ref|NP_001156918.1|//carboxypeptidase A4 isoform 2 preproprotein [Homo sapiens] ;gi|61743916|ref|NP_057436.2|//carboxypeptidase A4 preproprotein [Homo sapiens]
6329	7805	44.6407	135.362	1.60039	2.42e-14	Up	8.62e-16	SCN4A	GO:0001518//voltage-gated sodium channel complex	GO:0005248//voltage-gated sodium channel activity	GO:0006936//muscle contraction;GO:0006814//sodium ion transport	K04837//voltage-gated sodium channel type IV alpha	gi|93587342|ref|NP_000325.4|//sodium channel protein type 4 subunit alpha [Homo sapiens]
387763	1361	11.1575	33.3495	1.57965	1.64e-05	Up	1.96e-06	C11orf96	NA	NA	NA	NA	gi|222537761|ref|NP_001138505.1|//uncharacterized protein C11orf96 [Homo sapiens]
64333	2213	2.76279	8.18563	1.56697	0.000975382	Up	0.000174273	ARHGAP9	GO:0005829//cytosol	GO:0005547//phosphatidylinositol-3,4,5-trisphosphate binding;GO:0005515//protein binding;GO:0005096//GTPase activator activity	GO:0043547//positive regulation of GTPase activity;GO:0051056//regulation of small GTPase mediated signal transduction	K20634//null	gi|122939147|ref|NP_115885.2|//rho GTPase-activating protein 9 isoform 1 [Homo sapiens];gi|767975090|ref|XP_011536960.1|//PREDICTED: rho GTPase-activating protein 9 isoform X5 [Homo sapiens];gi|119617421|gb|EAW97015.1|//Rho GTPase activating protein 9, isoform CRA_b [Homo sapiens];gi|47117294|sp|Q9BRR9.2|RHG09_HUMAN//RecName: Full=Rho GTPase-activating protein 9; AltName: Full=Rho-type GTPase-act…
1803	3516	30.8505	91.3726	1.56647	1.57e-10	Up	8.64e-12	DPP4	GO:0005765//lysosomal membrane;GO:0070062//extracellular vesicular exosome;GO:0005925//focal adhesion;GO:0016324//apical plasma membrane;GO:0046581//intercellular canaliculus;GO:0071438//invadopodium membrane;GO:0031258//lamellipodium membrane;GO:0009986//cell surface;GO:0045121//membrane raft;GO:0030139//endocytic vesicle;GO:0016021//integral component of membrane	GO:0002020//protease binding;GO:0004252//serine-type endopeptidase activity;GO:0005102//receptor binding;GO:0001618//virus receptor activity;GO:0042803//protein homodimerization activity;GO:0008239//dipeptidyl-peptidase activity	GO:0006508//proteolysis;GO:0033632//regulation of cell-cell adhesion mediated by integrin;GO:0043542//endothelial cell migration;GO:0010716//negative regulation of extracellular matrix disassembly;GO:0031295//T cell costimulation;GO:0001666//response to hypoxia;GO:0008284//positive regulation of cell proliferation	K01278//dipeptidyl-peptidase 4 [EC:3.4.14.5]	gi|530369972|ref|XP_005246428.1|//PREDICTED: dipeptidyl peptidase 4 isoform X1 [Homo sapiens];gi|18765694|ref|NP_001926.2|//dipeptidyl peptidase 4 [Homo sapiens]
11010	3917	136.772	405.059	1.56636	4.99e-39	Up	3.14e-41	GLIPR1	GO:0005576//extracellular region;GO:0016021//integral component of membrane;GO:0005886//plasma membrane	NA	GO:0044255//cellular lipid metabolic process;GO:0044281//small molecule metabolic process	K20412//null	gi|119617712|gb|EAW97306.1|//GLI pathogenesis-related 1 (glioma), isoform CRA_a [Homo sapiens];gi|110825980|ref|NP_006842.2|//glioma pathogenesis-related protein 1 precursor [Homo sapiens];gi|119617713|gb|EAW97307.1|//GLI pathogenesis-related 1 (glioma), isoform CRA_b [Homo sapiens]
5669	1929	3.19274	9.44051	1.56407	0.00100345	Up	0.000179823	PSG1	GO:0005576//extracellular region	GO:0005515//protein binding	GO:0007565//female pregnancy	K06500//pregnancy specific beta-1-glycoprotein	gi|119577558|gb|EAW57154.1|//pregnancy specific beta-1-glycoprotein 1, isoform CRA_a [Homo sapiens];gi|296317345|ref|NP_001171754.1|//pregnancy-specific beta-1-glycoprotein 1 isoform 2 precursor [Homo sapiens];gi|663071079|ref|NP_001284702.1|//pregnancy-specific beta-1-glycoprotein 1 isoform 4 precursor [Homo sapiens];gi|296317348|ref|NP_001171755.1|//pregnancy-specific beta-1-glycoprotein 1 isof…
23645	2399	272.822	805.748	1.56237	5.17e-72	Up	1.26e-74	PPP1R15A	GO:0005794//Golgi apparatus;GO:0005829//cytosol;GO:0000164//protein phosphatase type 1 complex;GO:0005741//mitochondrial outer membrane;GO:0005789//endoplasmic reticulum membrane	GO:0008157//protein phosphatase 1 binding;GO:0019901//protein kinase binding	GO:0030512//negative regulation of transforming growth factor beta receptor signaling pathway;GO:0006417//regulation of translation;GO:0006974//cellular response to DNA damage stimulus;GO:0007050//cell cycle arrest;GO:0030968//endoplasmic reticulum unfolded protein response;GO:0006915//apoptotic process	K14019//protein phosphatase 1 regulatory subunit 15A	gi|157674363|ref|NP_055145.3|//protein phosphatase 1 regulatory subunit 15A [Homo sapiens]
3008	785	9.2576	27.2622	1.55819	9.08e-05	Up	1.28e-05	HIST1H1E	GO:0070062//extracellular vesicular exosome;GO:0000786//nucleosome;GO:0005720//nuclear heterochromatin	GO:0005515//protein binding;GO:0031490//chromatin DNA binding	GO:0006334//nucleosome assembly;GO:0016584//nucleosome positioning	K11275//histone H1/5	gi|4885379|ref|NP_005312.1|//histone H1.4 [Homo sapiens]
9518	1220	282.437	823.915	1.54456	6.35e-72	Up	1.58e-74	GDF15	GO:0070062//extracellular vesicular exosome;GO:0005615//extracellular space	GO:0008083//growth factor activity;GO:0005125//cytokine activity;GO:0005160//transforming growth factor beta receptor binding	GO:0007179//transforming growth factor beta receptor signaling pathway;GO:0007267//cell-cell signaling	K05504//growth differentiation factor 15	gi|153792495|ref|NP_004855.2|//growth/differentiation factor 15 preproprotein [Homo sapiens]
4359	1970	5.44793	15.8217	1.53812	0.000618048	Up	0.000105273	MPZ	GO:0016323//basolateral plasma membrane;GO:0005887//integral component of plasma membrane;GO:0005791//rough endoplasmic reticulum;GO:0043209//myelin sheath;GO:0005764//lysosome	GO:0005198//structural molecule activity	GO:0007268//synaptic transmission;GO:0045217//cell-cell junction maintenance	K06770//myelin protein zero	gi|937231667|ref|NP_001302420.1|//myelin protein P0 isoform L-MPZ precursor [Homo sapiens];gi|2160399|dbj|BAA03540.1|//peripheral myelin protein zero [Homo sapiens]
5672	1984	132.093	379.976	1.52435	2.61e-31	Up	2.23e-33	PSG4	GO:0070062//extracellular vesicular exosome	NA	GO:0007565//female pregnancy;GO:0006952//defense response	K06500//pregnancy specific beta-1-glycoprotein	gi|119577580|gb|EAW57176.1|//pregnancy specific beta-1-glycoprotein 4, isoform CRA_c [Homo sapiens];gi|768010087|ref|XP_011525431.1|//PREDICTED: pregnancy-specific beta-1-glycoprotein 4 isoform X2 [Homo sapiens];gi|42560235|ref|NP_002771.2|//pregnancy-specific beta-1-glycoprotein 4 isoform 1 precursor [Homo sapiens];gi|451770410|ref|NP_001263424.1|//pregnancy-specific beta-1-glycoprotein 4 isofor…
3007	777	8.83691	25.3685	1.52142	0.000162259	Up	2.42e-05	HIST1H1D	GO:0005719//nuclear euchromatin;GO:0000786//nucleosome	GO:0031490//chromatin DNA binding	GO:0006334//nucleosome assembly	K11275//histone H1/5	gi|4885377|ref|NP_005311.1|//histone H1.3 [Homo sapiens]
51438	2008	3.71398	10.5607	1.50767	0.00147515	Up	0.000275742	MAGEC2	GO:0005634//nucleus;GO:0005737//cytoplasm	GO:0031625//ubiquitin protein ligase binding	GO:0044257//cellular protein catabolic process;GO:0051443//positive regulation of ubiquitin-protein transferase activity	K19482//necdin	gi|7706605|ref|NP_057333.1|//melanoma-associated antigen C2 [Homo sapiens]
374	1290	72.2424	204.819	1.50343	3e-18	Up	7.27e-20	AREG	GO:0005615//extracellular space;GO:0005634//nucleus;GO:0009986//cell surface;GO:0016021//integral component of membrane;GO:0005789//endoplasmic reticulum membrane;GO:0033116//endoplasmic reticulum-Golgi intermediate compartment membrane;GO:0012507//ER to Golgi transport vesicle membrane;GO:0000139//Golgi membrane	GO:0008083//growth factor activity;GO:0005125//cytokine activity;GO:0005154//epidermal growth factor receptor binding	GO:0007186//G-protein coupled receptor signaling pathway;GO:0008283//cell proliferation;GO:0007173//epidermal growth factor receptor signaling pathway;GO:0007267//cell-cell signaling;GO:0045740//positive regulation of DNA replication	K09782//amphiregulin	gi|4502199|ref|NP_001648.1|//amphiregulin preproprotein [Homo sapiens]
8351	921	24.0945	67.5864	1.48803	7.83e-08	Up	6.38e-09	HIST1H3D	GO:0016020//membrane;GO:0070062//extracellular vesicular exosome;GO:0000784//nuclear chromosome, telomeric region;GO:0005654//nucleoplasm;GO:0005913//cell-cell adherens junction;GO:0000788//nuclear nucleosome	GO:0042393//histone binding;GO:0003677//DNA binding;GO:0098641//cadherin binding involved in cell-cell adhesion;GO:0046982//protein heterodimerization activity	GO:0060968//regulation of gene silencing;GO:0007596//blood coagulation;GO:0051320//S phase;GO:0006334//nucleosome assembly	K11253//histone H3	gi|281345292|gb|EFB20876.1|//hypothetical protein PANDA_018573, partial [Ailuropoda melanoleuca]
10344	632	17.4961	47.9701	1.4551	7.52e-06	Up	8.54e-07	CCL26	GO:0005615//extracellular space	GO:0008009//chemokine activity;GO:0048020//CCR chemokine receptor binding	GO:0030335//positive regulation of cell migration;GO:0006955//immune response;GO:0007267//cell-cell signaling;GO:0001938//positive regulation of endothelial cell proliferation;GO:0006935//chemotaxis;GO:0030838//positive regulation of actin filament polymerization;GO:0006954//inflammatory response	K21096//null	gi|5174671|ref|NP_006063.1|//C-C motif chemokine 26 precursor [Homo sapiens]
968	1867	320.656	877.234	1.45194	8.3e-70	Up	2.27e-72	CD68	GO:0005765//lysosomal membrane;GO:0010008//endosome membrane;GO:0016021//integral component of membrane;GO:0005886//plasma membrane	NA	GO:0071310//cellular response to organic substance	K06501//CD68 antigen	gi|91199548|ref|NP_001242.2|//macrosialin isoform A precursor [Homo sapiens];gi|91199550|ref|NP_001035148.1|//macrosialin isoform B precursor [Homo sapiens]
623	1319	11.6761	31.8479	1.44764	8.63e-05	Up	1.21e-05	BDKRB1	GO:0005783//endoplasmic reticulum;GO:0005887//integral component of plasma membrane;GO:0043005//neuron projection	GO:0004947//bradykinin receptor activity;GO:0005515//protein binding;GO:0042277//peptide binding	GO:0030308//negative regulation of cell growth;GO:0045776//negative regulation of blood pressure;GO:0007205//protein kinase C-activating G-protein coupled receptor signaling pathway;GO:0001933//negative regulation of protein phosphorylation;GO:0019233//sensory perception of pain;GO:0032496//response to lipopolysaccharide;GO:0051281//positive regulation of release of sequestered calcium ion into c…	K03915//bradykinin receptor B1	gi|20544172|ref|NP_000701.2|//B1 bradykinin receptor [Homo sapiens]
118611	2451	28.3608	76.9688	1.44037	2.78e-08	Up	2.12e-09	C10orf90	GO:0005813//centrosome;GO:0015629//actin cytoskeleton;GO:0005737//cytoplasm	NA	GO:0030308//negative regulation of cell growth;GO:0007095//mitotic G2 DNA damage checkpoint;GO:0010212//response to ionizing radiation;GO:0009411//response to UV;GO:0050821//protein stabilization	K16773//fragile-site associated tumor suppressor	gi|530392989|ref|XP_005269549.1|//PREDICTED: centrosomal protein C10orf90 isoform X7 [Homo sapiens];gi|52145312|ref|NP_001004298.2|//centrosomal protein C10orf90 [Homo sapiens];gi|767961441|ref|XP_011537519.1|//PREDICTED: centrosomal protein C10orf90 isoform X3 [Homo sapiens];gi|530392987|ref|XP_005269548.1|//PREDICTED: centrosomal protein C10orf90 isoform X2 [Homo sapiens];gi|694942358|ref|XP_00…
147372	6122	36.6743	99.5189	1.4402	4.07e-10	Up	2.35e-11	CCBE1	GO:0005615//extracellular space;GO:0005581//collagen trimer;GO:0005578//proteinaceous extracellular matrix	GO:0002020//protease binding;GO:0005518//collagen binding;GO:0005509//calcium ion binding	GO:0001946//lymphangiogenesis;GO:0048845//venous blood vessel morphogenesis;GO:0002040//sprouting angiogenesis	K19638//collagen and calcium-binding EGF domain-containing protein 1	gi|685604322|ref|XP_009191088.1|//PREDICTED: collagen and calcium-binding EGF domain-containing protein 1-like [Papio anubis];gi|426386113|ref|XP_004059537.1|//PREDICTED: collagen and calcium-binding EGF domain-containing protein 1 [Gorilla gorilla gorilla]
53836	1521	7.98577	21.2375	1.41111	0.000778481	Up	0.00013589	GPR87	GO:0005887//integral component of plasma membrane	GO:0045028//G-protein coupled purinergic nucleotide receptor activity	NA	K08389//G protein-coupled receptor 87	gi|224586796|ref|NP_076404.3|//G-protein coupled receptor 87 [Homo sapiens]
85409	1753	20.7821	55.2534	1.41072	4.59e-06	Up	4.99e-07	NKD2	GO:0016323//basolateral plasma membrane;GO:0031410//cytoplasmic vesicle;GO:0016328//lateral plasma membrane	GO:0005509//calcium ion binding;GO:0031625//ubiquitin protein ligase binding;GO:0019838//growth factor binding	GO:0090090//negative regulation of canonical Wnt signaling pathway;GO:0010954//positive regulation of protein processing;GO:0048210//Golgi vesicle fusion to target membrane;GO:0032436//positive regulation of proteasomal ubiquitin-dependent protein catabolic process;GO:0006887//exocytosis	K03213//naked cuticle	gi|14916427|ref|NP_149111.1|//protein naked cuticle homolog 2 isoform 1 [Homo sapiens];gi|402747026|ref|NP_001258011.1|//protein naked cuticle homolog 2 isoform 2 [Homo sapiens];gi|530378984|ref|XP_005248440.1|//PREDICTED: protein naked cuticle homolog 2 isoform X3 [Homo sapiens];gi|767934714|ref|XP_011512452.1|//PREDICTED: protein naked cuticle homolog 2 isoform X2 [Homo sapiens];gi|530378982|re…
5806	1955	61.3076	162.917	1.41	1.15e-14	Up	3.96e-16	PTX3	GO:0005615//extracellular space;GO:0005634//nucleus	GO:0000978//RNA polymerase II core promoter proximal region sequence-specific DNA binding;GO:0001872//(1->3)-beta-D-glucan binding;GO:0001077//RNA polymerase II core promoter proximal region sequence-specific DNA binding transcription factor activity involved in positive regulation of transcription;GO:0001849//complement component C1q binding;GO:0046790//virion binding	GO:0030901//midbrain development;GO:0002089//lens morphogenesis in camera-type eye;GO:0071542//dopaminergic neuron differentiation;GO:0006954//inflammatory response;GO:0045893//positive regulation of transcription, DNA-templated;GO:0048666//neuron development;GO:0070306//lens fiber cell differentiation;GO:0050766//positive regulation of phagocytosis;GO:0007626//locomotory behavior;GO:0045429//pos…	K16143//null;K01672//carbonic anhydrase [EC:4.2.1.1];K01115//phospholipase D1/2 [EC:3.1.4.4]	gi|167900484|ref|NP_002843.2|//pentraxin-related protein PTX3 precursor [Homo sapiens]
23769	3957	10.813	28.7068	1.40863	0.00033308	Up	5.34e-05	FLRT1	GO:0005615//extracellular space;GO:0005925//focal adhesion;GO:0005578//proteinaceous extracellular matrix;GO:0048471//perinuclear region of cytoplasm;GO:0005887//integral component of plasma membrane;GO:0044306//neuron projection terminus;GO:0005911//cell-cell junction;GO:0032809//neuronal cell body membrane;GO:0005789//endoplasmic reticulum membrane;GO:0030659//cytoplasmic vesicle membrane	GO:0004860//protein kinase inhibitor activity;GO:0005057//receptor signaling protein activity;GO:0030674//protein binding, bridging;GO:0005104//fibroblast growth factor receptor binding	GO:0007155//cell adhesion	K16362//leucine-rich repeat transmembrane protein FLRT	gi|34577057|ref|NP_037412.2|//leucine-rich repeat transmembrane protein FLRT1 [Homo sapiens]
8291	6873	28.625	75.3589	1.3965	7.33e-08	Up	5.93e-09	DYSF	GO:0030315//T-tubule;GO:0070062//extracellular vesicular exosome;GO:0005770//late endosome;GO:0030027//lamellipodium;GO:0030139//endocytic vesicle;GO:0016021//integral component of membrane;GO:0005769//early endosome;GO:0030659//cytoplasmic vesicle membrane	GO:0005544//calcium-dependent phospholipid binding;GO:0005515//protein binding;GO:0005509//calcium ion binding	GO:0006906//vesicle fusion;GO:0001778//plasma membrane repair	K18261//dysferlin	gi|195976756|ref|NP_001124449.1|//dysferlin isoform 10 [Homo sapiens];gi|195976766|ref|NP_001124454.1|//dysferlin isoform 7 [Homo sapiens];gi|195976821|ref|NP_001123927.1|//dysferlin isoform 2 [Homo sapiens];gi|195976775|ref|NP_001124457.1|//dysferlin isoform 4 [Homo sapiens];gi|195976760|ref|NP_001124451.1|//dysferlin isoform 12 [Homo sapiens];gi|195976773|ref|NP_001124456.1|//dysferlin isoform …
9536	1789	529.909	1376.32	1.377	1.43e-73	Up	3.3e-76	PTGES	GO:0016021//integral component of membrane;GO:0005789//endoplasmic reticulum membrane;GO:0005641//nuclear envelope lumen;GO:0048471//perinuclear region of cytoplasm	GO:0043295//glutathione binding;GO:0050220//prostaglandin-E synthase activity	GO:0014070//response to organic cyclic compound;GO:0007165//signal transduction;GO:0034097//response to cytokine;GO:0032496//response to lipopolysaccharide;GO:0002526//acute inflammatory response;GO:0032526//response to retinoic acid;GO:0051592//response to calcium ion;GO:0002544//chronic inflammatory response;GO:0001516//prostaglandin biosynthetic process;GO:0008285//negative regulation of cell …	K15729//microsomal prostaglandin-E synthase 1 [EC:5.3.99.3]	gi|4758910|ref|NP_004869.1|//prostaglandin E synthase [Homo sapiens];gi|119608308|gb|EAW87902.1|//hCG30600, isoform CRA_a [Homo sapiens]
54518	2659	8.63021	22.2689	1.36756	0.00101124	Up	0.00018152	APBB1IP	GO:0005856//cytoskeleton;GO:0042101//T cell receptor complex;GO:0005925//focal adhesion;GO:0005829//cytosol;GO:0030027//lamellipodium	GO:0005515//protein binding	GO:0007165//signal transduction;GO:0030168//platelet activation	K17704//amyloid beta A4 precursor protein-binding family B member 1-interacting protein	gi|56118221|ref|NP_061916.3|//amyloid beta A4 precursor protein-binding family B member 1-interacting protein [Homo sapiens];gi|767960142|ref|XP_011517816.1|//PREDICTED: amyloid beta A4 precursor protein-binding family B member 1-interacting protein isoform X2 [Homo sapiens]
84699	2623	300.784	773.739	1.36312	9.76e-50	Up	4.12e-52	CREB3L3	GO:0005634//nucleus;GO:0016021//integral component of membrane;GO:0005789//endoplasmic reticulum membrane	GO:0001228//RNA polymerase II transcription regulatory region sequence-specific DNA binding transcription factor activity involved in positive regulation of transcription;GO:0000977//RNA polymerase II regulatory region sequence-specific DNA binding;GO:0035497//cAMP response element binding;GO:0046982//protein heterodimerization activity;GO:0042803//protein homodimerization activity	GO:0006986//response to unfolded protein;GO:0006351//transcription, DNA-templated	K09048//cyclic AMP-responsive element-binding protein 3	gi|433282990|ref|NP_001258926.1|//cyclic AMP-responsive element-binding protein 3-like protein 3 isoform d [Homo sapiens];gi|433282986|ref|NP_001258924.1|//cyclic AMP-responsive element-binding protein 3-like protein 3 isoform b [Homo sapiens];gi|14211949|ref|NP_115996.1|//cyclic AMP-responsive element-binding protein 3-like protein 3 isoform a [Homo sapiens];gi|433282988|ref|NP_001258925.1|//cyc…
1847	2545	54.2979	137.732	1.34289	1.32e-11	Up	6.35e-13	DUSP5	GO:0005654//nucleoplasm	GO:0017017//MAP kinase tyrosine/serine/threonine phosphatase activity;GO:0005515//protein binding;GO:0004725//protein tyrosine phosphatase activity	GO:0035335//peptidyl-tyrosine dephosphorylation;GO:0001706//endoderm formation;GO:0000188//inactivation of MAPK activity	K04459//dual specificity MAP kinase phosphatase [EC:3.1.3.16 3.1.3.48]	gi|62865890|ref|NP_004410.3|//dual specificity protein phosphatase 5 [Homo sapiens]
9572	2793	444.551	1126.84	1.34187	6.26e-76	Up	1.34e-78	NR1D1	GO:0005654//nucleoplasm;GO:0043197//dendritic spine;GO:0000790//nuclear chromatin;GO:0005737//cytoplasm	GO:0003707//steroid hormone receptor activity;GO:0000978//RNA polymerase II core promoter proximal region sequence-specific DNA binding;GO:0020037//heme binding;GO:0001046//core promoter sequence-specific DNA binding;GO:0003714//transcription corepressor activity;GO:0001222//transcription corepressor binding;GO:0004879//ligand-activated sequence-specific DNA binding RNA polymerase II transcriptio…	GO:0007623//circadian rhythm;GO:0034144//negative regulation of toll-like receptor 4 signaling pathway;GO:0071222//cellular response to lipopolysaccharide;GO:0030522//intracellular receptor signaling pathway;GO:0000122//negative regulation of transcription from RNA polymerase II promoter;GO:0010871//negative regulation of receptor biosynthetic process;GO:2000189//positive regulation of cholestero…	K03728//nuclear receptor subfamily 1 group D member 1	gi|13430848|ref|NP_068370.1|//nuclear receptor subfamily 1 group D member 1 [Homo sapiens]
1958	3136	28.9031	72.3944	1.32465	6.06e-07	Up	5.67e-08	EGR1	GO:0005654//nucleoplasm;GO:0005737//cytoplasm	GO:0046872//metal ion binding;GO:0000977//RNA polymerase II regulatory region sequence-specific DNA binding;GO:0001077//RNA polymerase II core promoter proximal region sequence-specific DNA binding transcription factor activity involved in positive regulation of transcription;GO:0035035//histone acetyltransferase binding	GO:0060337//type I interferon signaling pathway;GO:0035690//cellular response to drug;GO:0071260//cellular response to mechanical stimulus;GO:0071873//response to norepinephrine;GO:0070498//interleukin-1-mediated signaling pathway;GO:0045471//response to ethanol;GO:0090090//negative regulation of canonical Wnt signaling pathway;GO:0071363//cellular response to growth factor stimulus;GO:0009749//r…	K09203//early growth response protein 1	gi|4503493|ref|NP_001955.1|//early growth response protein 1 [Homo sapiens]
3575	4574	135.566	330.212	1.28439	4.39e-22	Up	7.48e-24	IL7R	GO:0009897//external side of plasma membrane;GO:0005576//extracellular region;GO:0016021//integral component of membrane	GO:0004917//interleukin-7 receptor activity;GO:0005515//protein binding;GO:0003823//antigen binding	GO:0000902//cell morphogenesis;GO:0048872//homeostasis of number of cells;GO:0008361//regulation of cell size;GO:0002377//immunoglobulin production;GO:0033089//positive regulation of T cell differentiation in thymus;GO:0048535//lymph node development;GO:0010628//positive regulation of gene expression;GO:0016049//cell growth;GO:0038111//interleukin-7-mediated signaling pathway;GO:0001915//negative…	K05072//interleukin 7 receptor	gi|530378801|ref|XP_005248356.1|//PREDICTED: interleukin-7 receptor subunit alpha isoform X2 [Homo sapiens];gi|28610151|ref|NP_002176.2|//interleukin-7 receptor subunit alpha precursor [Homo sapiens]
55057	5194	32.5492	79.0856	1.28079	4.98e-07	Up	4.59e-08	AIM1L	NA	NA	NA	K16810//TBCC domain-containing protein 1	gi|767904868|ref|XP_011539974.1|//PREDICTED: absent in melanoma 1-like protein isoform X2 [Homo sapiens];gi|301069394|ref|NP_001034864.2|//absent in melanoma 1-like protein [Homo sapiens] ;gi|767904870|ref|XP_011539975.1|//PREDICTED: absent in melanoma 1-like protein isoform X3 [Homo sapiens]
1647	1361	267.852	646.84	1.27197	1.77e-40	Up	1.03e-42	GADD45A	GO:0005654//nucleoplasm;GO:0005737//cytoplasm	GO:0005515//protein binding;GO:0001047//core promoter binding	GO:0006281//DNA repair;GO:0007098//centrosome cycle;GO:0071260//cellular response to mechanical stimulus;GO:2000379//positive regulation of reactive oxygen species metabolic process;GO:0007050//cell cycle arrest;GO:0006915//apoptotic process;GO:0006469//negative regulation of protein kinase activity;GO:0042770//signal transduction in response to DNA damage;GO:0071479//cellular response to ionizin…	K04402//growth arrest and DNA-damage-inducible protein	gi|315075323|ref|NP_001186670.1|//growth arrest and DNA damage-inducible protein GADD45 alpha isoform 2 [Homo sapiens];gi|315075325|ref|NP_001186671.1|//growth arrest and DNA damage-inducible protein GADD45 alpha isoform 3 [Homo sapiens];gi|4503287|ref|NP_001915.1|//growth arrest and DNA damage-inducible protein GADD45 alpha isoform 1 [Homo sapiens]
22943	1815	491.025	1175.84	1.25983	1.88e-68	Up	5.46e-71	DKK1	GO:0005615//extracellular space;GO:0031901//early endosome membrane;GO:0005886//plasma membrane	GO:0008083//growth factor activity;GO:0048019//receptor antagonist activity;GO:0004871//signal transducer activity;GO:0039706//co-receptor binding;GO:0050750//low-density lipoprotein particle receptor binding	GO:0030514//negative regulation of BMP signaling pathway;GO:0000122//negative regulation of transcription from RNA polymerase II promoter;GO:0090082//positive regulation of heart induction by negative regulation of canonical Wnt signaling pathway;GO:0042662//negative regulation of mesodermal cell fate specification;GO:0000904//cell morphogenesis involved in differentiation;GO:0048642//negative re…	K02165//dickkopf	gi|7110719|ref|NP_036374.1|//dickkopf-related protein 1 precursor [Homo sapiens]
4208	4161	7.16086	16.7513	1.22607	0.006694	Up	0.00149016	MEF2C	GO:0098794//null;GO:0043234//protein complex;GO:0016607//nuclear speck;GO:0005737//cytoplasm	GO:0071837//HMG box domain binding;GO:0000978//RNA polymerase II core promoter proximal region sequence-specific DNA binding;GO:0001046//core promoter sequence-specific DNA binding;GO:0001205//RNA polymerase II distal enhancer sequence-specific DNA binding transcription factor activity involved in positive regulation of transcription;GO:0042826//histone deacetylase binding;GO:0046982//protein het…	GO:0014902//myotube differentiation;GO:0045666//positive regulation of neuron differentiation;GO:0055012//ventricular cardiac muscle cell differentiation;GO:0048011//neurotrophin TRK receptor signaling pathway;GO:0001568//blood vessel development;GO:0034134//toll-like receptor 2 signaling pathway;GO:0003211//cardiac ventricle formation;GO:0048666//neuron development;GO:0071560//cellular response …	K04454//MADS-box transcription enhancer factor 2C	gi|119616370|gb|EAW95964.1|//MADS box transcription enhancer factor 2, polypeptide C (myocyte enhancer factor 2C), isoform CRA_c [Homo sapiens];gi|119616372|gb|EAW95966.1|//MADS box transcription enhancer factor 2, polypeptide C (myocyte enhancer factor 2C), isoform CRA_e [Homo sapiens];gi|301069384|ref|NP_001180278.1|//myocyte-specific enhancer factor 2C isoform 5 [Homo sapiens];gi|545185425|ref…
5055	1922	8.1029	18.8174	1.21556	0.00532685	Up	0.00115419	SERPINB2	GO:0005615//extracellular space;GO:0005737//cytoplasm;GO:0005886//plasma membrane	GO:0004867//serine-type endopeptidase inhibitor activity	GO:0042730//fibrinolysis;GO:0010951//negative regulation of endopeptidase activity;GO:0030162//regulation of proteolysis;GO:0043066//negative regulation of apoptotic process	K19821//null	gi|4505595|ref|NP_002566.1|//plasminogen activator inhibitor 2 [Homo sapiens]
6775	2789	13.9194	32.2759	1.21336	0.00130533	Up	0.000239969	STAT4	GO:0005654//nucleoplasm;GO:0005737//cytoplasm	GO:0005515//protein binding;GO:0000977//RNA polymerase II regulatory region sequence-specific DNA binding;GO:0004871//signal transducer activity;GO:0003700//sequence-specific DNA binding transcription factor activity	GO:0007259//JAK-STAT cascade;GO:0008283//cell proliferation;GO:0045944//positive regulation of transcription from RNA polymerase II promoter;GO:0006468//protein phosphorylation;GO:0019221//cytokine-mediated signaling pathway	K11222//signal transducer and activator of transcription 4	gi|675781811|ref|XP_008948871.1|//PREDICTED: signal transducer and activator of transcription 4 isoform X1 [Pan paniscus];gi|767919438|ref|XP_011510008.1|//PREDICTED: signal transducer and activator of transcription 4 isoform X3 [Homo sapiens]
23764	2446	76.1415	176.016	1.20895	7.04e-12	Up	3.25e-13	MAFF	GO:0005654//nucleoplasm;GO:0005739//mitochondrion	GO:0001228//RNA polymerase II transcription regulatory region sequence-specific DNA binding transcription factor activity involved in positive regulation of transcription;GO:0043565//sequence-specific DNA binding	GO:0007567//parturition;GO:0007596//blood coagulation;GO:0045604//regulation of epidermal cell differentiation;GO:0001701//in utero embryonic development;GO:0006366//transcription from RNA polymerase II promoter	K09037//transcription factor MAFF/G/K	gi|239048390|ref|NP_001155046.1|//transcription factor MafF isoform b [Homo sapiens] ;gi|6912490|ref|NP_036455.1|//transcription factor MafF isoform a [Homo sapiens]
3560	4050	6.12465	14.1327	1.20633	0.0100998	Up	0.00238027	IL2RB	GO:0005887//integral component of plasma membrane;GO:0009897//external side of plasma membrane;GO:0005622//intracellular	GO:0005088//Ras guanyl-nucleotide exchange factor activity;GO:0019976//interleukin-2 binding;GO:0004911//interleukin-2 receptor activity	GO:0019048//modulation by virus of host morphology or physiology;GO:0038110//interleukin-2-mediated signaling pathway;GO:0043066//negative regulation of apoptotic process;GO:0006461//protein complex assembly	K05069//interleukin 2 receptor beta	gi|4504665|ref|NP_000869.1|//interleukin-2 receptor subunit beta precursor [Homo sapiens]
79153	1115	127.141	293.295	1.20592	7.29e-19	Up	1.62e-20	GDPD3	GO:0070062//extracellular vesicular exosome;GO:0016021//integral component of membrane	GO:0046872//metal ion binding;GO:0008889//glycerophosphodiester phosphodiesterase activity	GO:0006071//glycerol metabolic process;GO:0006629//lipid metabolic process	K19179//glycerophosphoinositol glycerophosphodiesterase [EC:3.1.4.44]	gi|146198640|ref|NP_077283.2|//glycerophosphodiester phosphodiesterase domain-containing protein 3 [Homo sapiens]
120939	2618	7.46287	17.1135	1.19734	0.00791785	Up	0.00180445	TMEM52B	GO:0070062//extracellular vesicular exosome;GO:0016021//integral component of membrane	NA	NA	NA	gi|23308507|ref|NP_694567.1|//transmembrane protein 52B isoform 1 [Homo sapiens];gi|557636675|ref|NP_001073283.1|//transmembrane protein 52B isoform 2 precursor [Homo sapiens]
63827	3068	41.7893	95.7518	1.19617	3.04e-07	Up	2.69e-08	BCAN	GO:0030425//dendrite;GO:0005615//extracellular space;GO:0043202//lysosomal lumen;GO:0031225//anchored component of membrane;GO:0045202//synapse;GO:0005578//proteinaceous extracellular matrix;GO:0005796//Golgi lumen	GO:0005201//extracellular matrix structural constituent;GO:0030246//carbohydrate binding;GO:0005540//hyaluronic acid binding	GO:0007155//cell adhesion;GO:0021766//hippocampus development;GO:0005975//carbohydrate metabolic process;GO:0030206//chondroitin sulfate biosynthetic process;GO:0030207//chondroitin sulfate catabolic process;GO:0030208//dermatan sulfate biosynthetic process	K06795//brevican	gi|38372931|ref|NP_940819.1|//brevican core protein isoform 2 precursor [Homo sapiens];gi|675761942|ref|XP_008972762.1|//PREDICTED: brevican core protein isoform X1 [Pan paniscus];gi|38372935|ref|NP_068767.3|//brevican core protein isoform 1 precursor [Homo sapiens]
23237	2948	26.6553	61.0437	1.19542	6.23e-05	Up	8.49e-06	ARC	GO:0001669//acrosomal vesicle;GO:0030054//cell junction;GO:0014069//postsynaptic density;GO:0016529//sarcoplasmic reticulum;GO:0005768//endosome;GO:0005730//nucleolus;GO:0005829//cytosol;GO:0015629//actin cytoskeleton;GO:0043197//dendritic spine;GO:0005739//mitochondrion;GO:0045211//postsynaptic membrane	GO:0089720//caspase binding;GO:0003723//RNA binding;GO:0043027//cysteine-type endopeptidase inhibitor activity involved in apoptotic process;GO:0005123//death receptor binding;GO:0005509//calcium ion binding;GO:0042802//identical protein binding;GO:0035877//death effector domain binding	GO:0006397//mRNA processing;GO:0007492//endoderm development;GO:0009952//anterior/posterior pattern specification;GO:0016477//cell migration;GO:0007612//learning;GO:0043066//negative regulation of apoptotic process;GO:0048168//regulation of neuronal synaptic plasticity;GO:0006897//endocytosis;GO:0007010//cytoskeleton organization;GO:0022604//regulation of cell morphogenesis;GO:0008380//RNA splici…	K15867//activity-regulated cytoskeleton-associated protein	gi|426360861|ref|XP_004047647.1|//PREDICTED: activity-regulated cytoskeleton-associated protein [Gorilla gorilla gorilla]
6450	1022	8.19598	18.6871	1.18905	0.00771638	Up	0.00175441	SH3BGR	GO:0005829//cytosol	GO:0005070//SH3/SH2 adaptor activity;GO:0017124//SH3 domain binding	GO:0006461//protein complex assembly	K13912//deleted in malignant brain tumors 1 protein	gi|960139170|ref|NP_001304669.1|//SH3 domain-binding glutamic acid-rich protein isoform c [Homo sapiens];gi|960139276|ref|NP_001304670.1|//SH3 domain-binding glutamic acid-rich protein isoform d [Homo sapiens];gi|6677929|ref|NP_031367.1|//SH3 domain-binding glutamic acid-rich protein isoform a [Homo sapiens];gi|960268187|ref|NP_001304673.1|//WRB-SH3BGR readthrough [Homo sapiens]
1755	5802	3.9531	8.9859	1.18468	0.017937	Up	0.00454682	DMBT1	GO:0042589//zymogen granule membrane;GO:0070062//extracellular vesicular exosome;GO:0005615//extracellular space;GO:0019898//extrinsic component of membrane;GO:0030670//phagocytic vesicle membrane	GO:0005044//scavenger receptor activity;GO:0035375//zymogen binding;GO:0048306//calcium-dependent protein binding;GO:0008329//signaling pattern recognition receptor activity	GO:0002221//pattern recognition receptor signaling pathway;GO:0001833//inner cell mass cell proliferation;GO:0030858//positive regulation of epithelial cell differentiation;GO:0051607//defense response to virus;GO:0019048//modulation by virus of host morphology or physiology;GO:0043152//induction of bacterial agglutination;GO:0015031//protein transport	K13912//deleted in malignant brain tumors 1 protein	gi|578819007|ref|XP_006717723.1|//PREDICTED: deleted in malignant brain tumors 1 protein isoform X9 [Homo sapiens];gi|767961867|ref|XP_011537693.1|//PREDICTED: deleted in malignant brain tumors 1 protein isoform X4 [Homo sapiens];gi|767961875|ref|XP_011537697.1|//PREDICTED: deleted in malignant brain tumors 1 protein isoform X8 [Homo sapiens];gi|767961882|ref|XP_011537700.1|//PREDICTED: deleted i…
6503	2872	6.03336	13.5768	1.17011	0.0130145	Up	0.0031746	SLA	GO:0005768//endosome	GO:0005070//SH3/SH2 adaptor activity;GO:0016785//transferase activity, transferring selenium-containing groups;GO:0000049//tRNA binding	NA	K08890//B lymphoid tyrosine kinase [EC:2.7.10.2];K08893//hemopoietic cell kinase [EC:2.7.10.2]	gi|675793962|ref|XP_008953704.1|//PREDICTED: src-like-adapter isoform X1 [Pan paniscus];gi|194328725|ref|NP_001039022.2|//src-like-adapter isoform b [Homo sapiens] ;gi|545478335|ref|NP_001269893.1|//src-like-adapter isoform d [Homo sapiens] ;gi|194328732|ref|NP_006739.2|//src-like-adapter isoform c [Homo sapiens];gi|545479149|ref|NP_001269894.1|//src-like-adapter isoform e [Homo sapiens]
8970	481	59.0383	132.677	1.16819	2.7e-09	Up	1.75e-10	HIST1H2BJ	GO:0070062//extracellular vesicular exosome;GO:0005615//extracellular space;GO:0005654//nucleoplasm;GO:0005737//cytoplasm;GO:0000788//nuclear nucleosome	GO:0003677//DNA binding;GO:0046982//protein heterodimerization activity	GO:0006334//nucleosome assembly;GO:0042742//defense response to bacterium	K11252//histone H2B	gi|20336754|ref|NP_066402.2|//histone H2B type 1-J [Homo sapiens]
9214	2148	7.07261	15.8351	1.16281	0.0114722	Up	0.00275207	FCMR	GO:0005576//extracellular region;GO:0016021//integral component of membrane	NA	GO:0043066//negative regulation of apoptotic process;GO:0006968//cellular defense response	K13073//polymeric immunoglobulin receptor;K16851//high affinity immunoglobulin alpha and immunoglobulin mu Fc receptor	gi|216547554|ref|NP_001135945.1|//fas apoptotic inhibitory molecule 3 isoform b [Homo sapiens] ;gi|4885641|ref|NP_005440.1|//fas apoptotic inhibitory molecule 3 isoform a precursor [Homo sapiens];gi|530366662|ref|XP_005273409.1|//PREDICTED: fas apoptotic inhibitory molecule 3 isoform X2 [Homo sapiens];gi|301069341|ref|NP_001180267.1|//fas apoptotic inhibitory molecule 3 isoform c precursor [Homo …
290	3666	1691.14	3760.16	1.1528	4.21e-134	Up	2.75e-137	ANPEP	GO:0005765//lysosomal membrane;GO:0070062//extracellular vesicular exosome;GO:0005615//extracellular space;GO:0031983//vesicle lumen;GO:0009897//external side of plasma membrane;GO:0005793//endoplasmic reticulum-Golgi intermediate compartment;GO:0012506//vesicle membrane;GO:0005887//integral component of plasma membrane;GO:0005829//cytosol	GO:0008270//zinc ion binding;GO:0042277//peptide binding;GO:0001618//virus receptor activity;GO:0070006//metalloaminopeptidase activity	GO:0001525//angiogenesis;GO:0006508//proteolysis;GO:0030154//cell differentiation;GO:0019048//modulation by virus of host morphology or physiology	K11140//aminopeptidase N [EC:3.4.11.2]	gi|157266300|ref|NP_001141.2|//aminopeptidase N precursor [Homo sapiens]
401207	5680	853.435	1887.98	1.14549	2.31e-60	Up	7.83e-63	C5orf63	GO:0005739//mitochondrion	NA	GO:0022900//electron transport chain	K00626//acetyl-CoA C-acetyltransferase [EC:2.3.1.9]	gi|256773207|ref|NP_001157951.1|//glutaredoxin-like protein C5orf63 isoform 1 [Homo sapiens];gi|256773203|ref|NP_001157950.1|//glutaredoxin-like protein C5orf63 isoform 2 [Homo sapiens]
338382	2955	6.00798	13.2709	1.14332	0.0162047	Up	0.00405094	RAB7B	GO:0045335//phagocytic vesicle;GO:0005770//late endosome;GO:0005764//lysosome;GO:0030670//phagocytic vesicle membrane;GO:0005802//trans-Golgi network	GO:0005525//GTP binding	GO:0032755//positive regulation of interleukin-6 production;GO:0034499//late endosome to Golgi transport;GO:0051092//positive regulation of NF-kappaB transcription factor activity;GO:0034144//negative regulation of toll-like receptor 4 signaling pathway;GO:0034164//negative regulation of toll-like receptor 9 signaling pathway;GO:0045654//positive regulation of megakaryocyte differentiation;GO:000…	K07898//Ras-related protein Rab-7B	gi|256985158|ref|NP_796377.3|//ras-related protein Rab-7b isoform a [Homo sapiens];gi|578800860|ref|XP_006711351.1|//PREDICTED: ras-related protein Rab-7b isoform X1 [Homo sapiens];gi|756140844|ref|NP_001291768.1|//ras-related protein Rab-7b isoform b [Homo sapiens]
3039	627	9.75619	21.4552	1.13694	0.00796355	Up	0.00181723	HBA1	GO:0016020//membrane;GO:0070062//extracellular vesicular exosome;GO:0072562//blood microparticle;GO:0031838//haptoglobin-hemoglobin complex;GO:0022627//cytosolic small ribosomal subunit;GO:0005833//hemoglobin complex;GO:0071682//endocytic vesicle lumen	GO:0020037//heme binding;GO:0004601//peroxidase activity;GO:0005506//iron ion binding;GO:0031720//haptoglobin binding;GO:0005344//oxygen transporter activity;GO:0019825//oxygen binding	GO:0015671//oxygen transport;GO:0015701//bicarbonate transport;GO:0051291//protein heterooligomerization;GO:0042744//hydrogen peroxide catabolic process;GO:0010942//positive regulation of cell death;GO:0044281//small molecule metabolic process	K13822//hemoglobin subunit alpha	gi|4504345|ref|NP_000508.1|//hemoglobin subunit alpha [Homo sapiens]
114907	6766	42.0401	91.5316	1.1225	2.13e-06	Up	2.18e-07	FBXO32	GO:0005654//nucleoplasm;GO:0030018//Z disc;GO:0019005//SCF ubiquitin ligase complex	GO:0005515//protein binding;GO:0004842//ubiquitin-protein transferase activity	GO:0016567//protein ubiquitination	K10305//F-box protein 25/32	gi|635050006|ref|XP_007999672.1|//PREDICTED: F-box only protein 32 [Chlorocebus sabaeus];gi|335057520|ref|NP_001229392.1|//F-box only protein 32 isoform 3 [Homo sapiens];gi|355698200|gb|EHH28748.1|//Muscle atrophy F-box protein, partial [Macaca mulatta]
726	4370	176.076	382.308	1.11854	9.91e-21	Up	1.92e-22	CAPN5	GO:0070062//extracellular vesicular exosome;GO:0009986//cell surface;GO:0005925//focal adhesion;GO:0005737//cytoplasm	GO:0004198//calcium-dependent cysteine-type endopeptidase activity	GO:0006508//proteolysis;GO:0007165//signal transduction	K08574//calpain-5 [EC:3.4.22.-]	gi|119595421|gb|EAW75015.1|//calpain 5, isoform CRA_b [Homo sapiens];gi|37577157|ref|NP_004046.2|//calpain-5 [Homo sapiens];gi|795149702|ref|XP_011794335.1|//PREDICTED: calpain-5 isoform X2 [Colobus angolensis palliatus]
1842	3241	49.4009	107.163	1.11719	4.19e-07	Up	3.8e-08	ECM2	GO:0005615//extracellular space;GO:0005614//interstitial matrix	GO:0070052//collagen V binding;GO:0005178//integrin binding;GO:0008201//heparin binding	GO:0007160//cell-matrix adhesion;GO:0030198//extracellular matrix organization;GO:0010811//positive regulation of cell-substrate adhesion	K08119//extracellular matrix protein 2	gi|308818204|ref|NP_001184224.1|//extracellular matrix protein 2 isoform 2 precursor [Homo sapiens];gi|308818206|ref|NP_001184225.1|//extracellular matrix protein 2 isoform 3 precursor [Homo sapiens];gi|4557543|ref|NP_001384.1|//extracellular matrix protein 2 isoform 1 precursor [Homo sapiens]
118471	801	13.4919	29.0623	1.10705	0.00511272	Up	0.00110324	PRAP1	GO:0005576//extracellular region	GO:0046872//metal ion binding;GO:0005515//protein binding	NA	K21250//null	gi|223633959|ref|NP_660203.3|//proline-rich acidic protein 1 isoform 1 precursor [Homo sapiens];gi|223633957|ref|NP_001138673.1|//proline-rich acidic protein 1 isoform 2 precursor [Homo sapiens]
7378	1350	446.147	960.864	1.10681	6.63e-47	Up	3.11e-49	UPP1	GO:0005829//cytosol	GO:0004850//uridine phosphorylase activity	GO:0046135//pyrimidine nucleoside catabolic process;GO:0043097//pyrimidine nucleoside salvage;GO:0006206//pyrimidine nucleobase metabolic process;GO:0046108//uridine metabolic process;GO:0042149//cellular response to glucose starvation;GO:0044206//UMP salvage;GO:0009166//nucleotide catabolic process	K00757//uridine phosphorylase [EC:2.4.2.3]	gi|694920967|ref|XP_009451326.1|//PREDICTED: uridine phosphorylase 1 isoform X4 [Pan troglodytes];gi|694920969|ref|XP_009451327.1|//PREDICTED: uridine phosphorylase 1 isoform X5 [Pan troglodytes];gi|4507839|ref|NP_003355.1|//uridine phosphorylase 1 isoform a [Homo sapiens];gi|566006090|ref|NP_001274357.1|//uridine phosphorylase 1 isoform b [Homo sapiens];gi|530384960|ref|XP_005249895.1|//PREDICTE…
84561	3449	162.544	348.771	1.10145	2.95e-19	Up	6.34e-21	SLC12A8	GO:0016021//integral component of membrane	GO:0015293//symporter activity	GO:0006813//potassium ion transport;GO:0055085//transmembrane transport	K14428//solute carrier family 12 (potassium/chloride transporters), member 8	gi|824631530|sp|A0AV02.4|S12A8_HUMAN//RecName: Full=Solute carrier family 12 member 8; AltName: Full=Cation-chloride cotransporter 9
170961	3194	12.6076	26.9071	1.0937	0.0052682	Up	0.00114085	ANKRD24	NA	NA	NA	K15502//serine/threonine-protein phosphatase 6 regulatory ankyrin repeat subunit A;K10331//ankyrin repeat and SOCS box protein 9	gi|768001171|ref|XP_011526066.1|//PREDICTED: ankyrin repeat domain-containing protein 24 isoform X6 [Homo sapiens];gi|768001176|ref|XP_011526068.1|//PREDICTED: ankyrin repeat domain-containing protein 24 isoform X8 [Homo sapiens];gi|768001173|ref|XP_011526067.1|//PREDICTED: ankyrin repeat domain-containing protein 24 isoform X7 [Homo sapiens];gi|768001157|ref|XP_011526059.1|//PREDICTED: ankyrin r…
51129	1886	59.2402	126.133	1.0903	4.81e-08	Up	3.8e-09	ANGPTL4	GO:0072562//blood microparticle;GO:0005578//proteinaceous extracellular matrix	GO:0042802//identical protein binding;GO:0004857//enzyme inhibitor activity	GO:0051005//negative regulation of lipoprotein lipase activity;GO:0030154//cell differentiation;GO:0043066//negative regulation of apoptotic process;GO:0051260//protein homooligomerization;GO:0001666//response to hypoxia;GO:0044281//small molecule metabolic process;GO:0070328//triglyceride homeostasis;GO:0044255//cellular lipid metabolic process;GO:0045766//positive regulation of angiogenesis	K08767//angiopoietin-like 4	gi|530427514|ref|XP_005272541.1|//PREDICTED: angiopoietin-related protein 4 isoform X1 [Homo sapiens];gi|530427516|ref|XP_005272542.1|//PREDICTED: angiopoietin-related protein 4 isoform X2 [Homo sapiens];gi|89264696|ref|NP_001034756.1|//angiopoietin-related protein 4 isoform b precursor [Homo sapiens];gi|37181670|gb|AAQ88642.1|//NL2 [Homo sapiens]
256979	1486	10.6317	22.611	1.08864	0.00895371	Up	0.00207542	SUN3	GO:0034993//SUN-KASH complex;GO:0016021//integral component of membrane	NA	NA	K19347//SUN domain-containing protein 1/2	gi|547235103|ref|NP_001271279.1|//SUN domain-containing protein 3 isoform 2 [Homo sapiens];gi|71834868|ref|NP_689995.3|//SUN domain-containing protein 3 isoform 1 [Homo sapiens]
84249	4569	2.87744	6.08629	1.08077	0.0337357	Up	0.00950713	PSD2	GO:0030425//dendrite;GO:0016021//integral component of membrane;GO:0043025//neuronal cell body	GO:0005086//ARF guanyl-nucleotide exchange factor activity;GO:0005543//phospholipid binding	GO:0030182//neuron differentiation;GO:0032012//regulation of ARF protein signal transduction;GO:0016192//vesicle-mediated transport	K12494//PH and SEC7 domain-containing protein	gi|767937880|ref|XP_011535998.1|//PREDICTED: PH and SEC7 domain-containing protein 2 isoform X1 [Homo sapiens]
84958	1989	2.57279	5.40692	1.07147	0.0339172	Up	0.00957439	SYTL1	GO:0070062//extracellular vesicular exosome;GO:0070382//exocytic vesicle;GO:0098793//null;GO:0042470//melanosome;GO:0019897//extrinsic component of plasma membrane	GO:0005544//calcium-dependent phospholipid binding;GO:0030276//clathrin binding;GO:0042043//neurexin family protein binding;GO:0005509//calcium ion binding;GO:0019905//syntaxin binding;GO:0017137//Rab GTPase binding	GO:0006886//intracellular protein transport;GO:0006887//exocytosis	K17598//synaptotagmin-like protein	gi|530361416|ref|XP_005246079.1|//PREDICTED: synaptotagmin-like protein 1 isoform X1 [Homo sapiens];gi|578799979|ref|XP_006711053.1|//PREDICTED: synaptotagmin-like protein 1 isoform X2 [Homo sapiens];gi|578799981|ref|XP_006711054.1|//PREDICTED: synaptotagmin-like protein 1 isoform X3 [Homo sapiens]
9245	2240	6.22053	13.0408	1.06792	0.0261045	Up	0.00702022	GCNT3	GO:0070062//extracellular vesicular exosome;GO:0016021//integral component of membrane;GO:0000139//Golgi membrane	GO:0047225//acetylgalactosaminyl-O-glycosyl-glycoprotein beta-1,6-N-acetylglucosaminyltransferase activity;GO:0003829//beta-1,3-galactosyl-O-glycosyl-glycoprotein beta-1,6-N-acetylglucosaminyltransferase activity;GO:0008109//N-acetyllactosaminide beta-1,6-N-acetylglucosaminyltransferase activity	GO:0043687//post-translational protein modification;GO:0048729//tissue morphogenesis;GO:0002426//immunoglobulin production in mucosal tissue;GO:0060993//kidney morphogenesis;GO:0050892//intestinal absorption;GO:0016266//O-glycan processing	K09662//N-acetylglucosaminyltransferase 3, mucin type [EC:2.4.1.-]	gi|4758422|ref|NP_004742.1|//beta-1,3-galactosyl-O-glycosyl-glycoprotein beta-1,6-N-acetylglucosaminyltransferase 3 [Homo sapiens]
83538	2392	7.30824	15.2876	1.06477	0.023303	Up	0.0061741	TTC25	GO:0005737//cytoplasm	GO:0005515//protein binding	NA	K02145//V-type H+-transporting ATPase subunit A [EC:3.6.3.14];K15837//G-protein signaling modulator 2;K09553//stress-induced-phosphoprotein 1	gi|13899233|ref|NP_113609.1|//tetratricopeptide repeat protein 25 [Homo sapiens];gi|767996095|ref|XP_011523626.1|//PREDICTED: tetratricopeptide repeat protein 25 isoform X2 [Homo sapiens]
6512	2372	6.34268	13.2545	1.06332	0.0287734	Up	0.00788664	SLC1A7	GO:0016021//integral component of membrane;GO:0005886//plasma membrane	GO:0017153//sodium:dicarboxylate symporter activity;GO:0005314//high-affinity glutamate transmembrane transporter activity	GO:0055085//transmembrane transport;GO:0015813//L-glutamate transport	K05618//solute carrier family 1 (glutamate transporter), member 7	gi|567316040|ref|NP_001274526.1|//excitatory amino acid transporter 5 isoform 3 [Homo sapiens];gi|567316146|ref|NP_001274524.1|//excitatory amino acid transporter 5 isoform 1 [Homo sapiens];gi|194239697|ref|NP_006662.3|//excitatory amino acid transporter 5 isoform 4 [Homo sapiens];gi|567316097|ref|NP_001274525.1|//excitatory amino acid transporter 5 isoform 2 [Homo sapiens]
341	588	11.5805	23.9809	1.0502	0.0105186	Up	0.00249209	APOC1	GO:0070062//extracellular vesicular exosome;GO:0005783//endoplasmic reticulum;GO:0034364//high-density lipoprotein particle;GO:0042627//chylomicron;GO:0034361//very-low-density lipoprotein particle	GO:0004859//phospholipase inhibitor activity;GO:0031210//phosphatidylcholine binding;GO:0060228//phosphatidylcholine-sterol O-acyltransferase activator activity;GO:0005504//fatty acid binding	GO:0010900//negative regulation of phosphatidylcholine catabolic process;GO:0010916//negative regulation of very-low-density lipoprotein particle clearance;GO:0051005//negative regulation of lipoprotein lipase activity;GO:0032375//negative regulation of cholesterol transport;GO:0048261//negative regulation of receptor-mediated endocytosis;GO:0033344//cholesterol efflux;GO:0034379//very-low-densit…	K04524//apolipoprotein E	gi|4502157|ref|NP_001636.1|//apolipoprotein C-I precursor [Homo sapiens]
105370579	1219	5.21276	10.7405	1.04294	0.0364617	Up	0.0104291	LOC105370579	NA	NA	NA	NA	gi|767895256|ref|XP_011506761.1|//PREDICTED: uncharacterized protein LOC105370579 [Homo sapiens]
164668	1067	22.9522	47.2011	1.04019	0.00106382	Up	0.000191968	APOBEC3H	GO:0005634//nucleus;GO:0000932//cytoplasmic mRNA processing body	GO:0005515//protein binding;GO:0004126//cytidine deaminase activity;GO:0008270//zinc ion binding	GO:0009972//cytidine deamination;GO:0010529//negative regulation of transposition;GO:0051607//defense response to virus;GO:0045087//innate immune response;GO:0045869//negative regulation of single stranded viral RNA replication via double stranded DNA intermediate;GO:0070383//DNA cytosine deamination	K18750//C->U-editing enzyme APOBEC3 [EC:3.5.4.-]	gi|669250883|ref|NP_861438.3|//DNA dC->dU-editing enzyme APOBEC-3H isoform SV-183 [Homo sapiens];gi|768023872|ref|XP_011528292.1|//PREDICTED: DNA dC->dU-editing enzyme APOBEC-3H isoform X2 [Homo sapiens];gi|669250881|ref|NP_001159475.2|//DNA dC->dU-editing enzyme APOBEC-3H isoform SV-200 [Homo sapiens];gi|669250885|ref|NP_001159474.2|//DNA dC->dU-editing enzyme APOBEC-3H isoform SV-182 [Homo sapi…
100507507	1181	33.2908	68.4423	1.03976	0.000118052	Up	1.71e-05	LOC100507507	NA	NA	NA	NA	gi|119572237|gb|EAW51852.1|//hCG1821214 [Homo sapiens]
93659	880	7.61845	15.644	1.03804	0.0269167	Up	0.00728659	CGB5	GO:0005576//extracellular region	GO:0005179//hormone activity	GO:0016486//peptide hormone processing;GO:0007165//signal transduction;GO:0034641//cellular nitrogen compound metabolic process;GO:0007267//cell-cell signaling;GO:0007292//female gamete generation;GO:0006915//apoptotic process;GO:0044281//small molecule metabolic process	K10045//chorionic gonadotropin, beta polypeptide	gi|4502789|ref|NP_000728.1|//choriogonadotropin subunit beta precursor [Homo sapiens]
131578	5930	65.0062	133.461	1.03777	2.31e-07	Up	1.99e-08	LRRC15	GO:0070062//extracellular vesicular exosome;GO:0016021//integral component of membrane;GO:0005737//cytoplasm	GO:0004860//protein kinase inhibitor activity;GO:0005518//collagen binding;GO:0001968//fibronectin binding;GO:0043236//laminin binding	NA	K13023//carboxypeptidase N regulatory subunit;K06260//platelet glycoprotein V	gi|288541297|ref|NP_570843.2|//leucine-rich repeat-containing protein 15 isoform b precursor [Homo sapiens];gi|288541295|ref|NP_001128529.2|//leucine-rich repeat-containing protein 15 isoform a precursor [Homo sapiens]
364	2145	6.20761	12.7388	1.03712	0.0325307	Up	0.00909993	AQP7	GO:0005887//integral component of plasma membrane;GO:0005911//cell-cell junction;GO:0005737//cytoplasm	GO:0015250//water channel activity;GO:0015254//glycerol channel activity;GO:0015204//urea transmembrane transporter activity	GO:0042493//response to drug;GO:0055085//transmembrane transport;GO:0006091//generation of precursor metabolites and energy;GO:0007588//excretion;GO:0070295//renal water absorption;GO:0007283//spermatogenesis;GO:0015793//glycerol transport	K08771//aquaporin-7	gi|4502187|ref|NP_001161.1|//aquaporin-7 isoform 1 [Homo sapiens];gi|970414605|ref|NP_001305087.1|//aquaporin-7 isoform 4 [Homo sapiens] ;gi|767954865|ref|XP_011516170.1|//PREDICTED: aquaporin-7 isoform X4 [Homo sapiens];gi|970414603|ref|NP_001305086.1|//aquaporin-7 isoform 3 [Homo sapiens]
117144	2634	30.0493	61.4051	1.03103	0.000391444	Up	6.38e-05	CATSPER1	GO:0031514//motile cilium;GO:0036128//CatSper complex	GO:0005515//protein binding;GO:0005245//voltage-gated calcium channel activity;GO:0005227//calcium activated cation channel activity	GO:0001539//cilium or flagellum-dependent cell motility;GO:0030317//sperm motility;GO:0051924//regulation of calcium ion transport;GO:0030154//cell differentiation;GO:0007275//multicellular organismal development;GO:0007342//fusion of sperm to egg plasma membrane;GO:0007283//spermatogenesis	K16889//cation channel sperm-associated protein 1	gi|221316609|ref|NP_444282.3|//cation channel sperm-associated protein 1 [Homo sapiens]
79570	2932	7.62169	15.3325	1.00841	0.0338403	Up	0.00954868	NKAIN1	GO:0016021//integral component of membrane;GO:0005886//plasma membrane	GO:0051117//ATPase binding	NA	NA	gi|296317328|ref|NP_078798.2|//sodium/potassium-transporting ATPase subunit beta-1-interacting protein 1 precursor [Homo sapiens];gi|635109982|ref|XP_007977860.1|//PREDICTED: sodium/potassium-transporting ATPase subunit beta-1-interacting protein 1 isoform X2 [Chlorocebus sabaeus]
9249	1526	14.5856	29.3149	1.00709	0.0093166	Up	0.00217356	DHRS3	GO:0016021//integral component of membrane;GO:0005789//endoplasmic reticulum membrane;GO:0042622//photoreceptor outer segment membrane	GO:0009055//electron carrier activity;GO:0052650//NADP-retinol dehydrogenase activity;GO:0000166//nucleotide binding;GO:0004745//retinol dehydrogenase activity	GO:0042572//retinol metabolic process;GO:0007601//visual perception	K11146//short-chain dehydrogenase/reductase 3 [EC:1.1.1.300]	gi|578800093|ref|XP_006711099.1|//PREDICTED: short-chain dehydrogenase/reductase 3 isoform X3 [Homo sapiens];gi|31543615|ref|NP_004744.2|//short-chain dehydrogenase/reductase 3 isoform 1 [Homo sapiens];gi|984655731|ref|NP_001306154.1|//short-chain dehydrogenase/reductase 3 isoform 2 [Homo sapiens]
7433	2756	156.415	313.411	1.00268	4.47e-15	Up	1.48e-16	VIPR1	GO:0005887//integral component of plasma membrane;GO:0043235//receptor complex	GO:0005515//protein binding;GO:0004999//vasoactive intestinal polypeptide receptor activity	GO:0006936//muscle contraction;GO:0007586//digestion;GO:0006955//immune response;GO:0007268//synaptic transmission;GO:0007187//G-protein coupled receptor signaling pathway, coupled to cyclic nucleotide second messenger;GO:0008284//positive regulation of cell proliferation	K04589//vasoactive intestinal peptide receptor 1	gi|353523865|ref|NP_001238812.1|//vasoactive intestinal polypeptide receptor 1 isoform 3 [Homo sapiens] ;gi|767924207|ref|XP_011532382.1|//PREDICTED: vasoactive intestinal polypeptide receptor 1 isoform X4 [Homo sapiens];gi|353523867|ref|NP_001238813.1|//vasoactive intestinal polypeptide receptor 1 isoform 4 [Homo sapiens];gi|15619006|ref|NP_004615.2|//vasoactive intestinal polypeptide receptor 1…
284021	1488	29.605	59.144	0.998391	0.000640824	*	0.000109398	MILR1	GO:0005887//integral component of plasma membrane;GO:0042629//mast cell granule	NA	GO:0043303//mast cell degranulation;GO:0033004//negative regulation of mast cell activation	K06471//platelet/endothelial cell adhesion molecule;K06727//Fc receptor-like protein	gi|530430999|ref|XP_005276934.1|//PREDICTED: allergin-1 isoform X2 [Homo sapiens];gi|530430989|ref|XP_005276929.1|//PREDICTED: allergin-1 isoform X1 [Homo sapiens];gi|604723328|ref|NP_001278246.1|//allergin-1 isoform Allergin-1S2 precursor [Homo sapiens]
105379561	1443	14.4738	28.7205	0.988636	0.0100714	*	0.00237178	LOC105379561	NA	NA	NA	NA	gi|767876818|ref|XP_011547337.1|//PREDICTED: uncharacterized protein LOC105378947 isoform X2 [Homo sapiens];gi|768042062|ref|XP_011544571.1|//PREDICTED: uncharacterized protein LOC105379561 isoform X1 [Homo sapiens];gi|768042066|ref|XP_011544572.1|//PREDICTED: uncharacterized protein LOC105379561 isoform X2 [Homo sapiens];gi|768042070|ref|XP_011544573.1|//PREDICTED: uncharacterized protein LOC105…
5646	899	38.8068	76.8532	0.985796	8.7e-05	*	1.22e-05	PRSS3	GO:0070062//extracellular vesicular exosome;GO:0005615//extracellular space	GO:0004252//serine-type endopeptidase activity;GO:0005515//protein binding;GO:0005509//calcium ion binding	GO:0006508//proteolysis;GO:0043542//endothelial cell migration;GO:0007586//digestion;GO:0031638//zymogen activation;GO:0045087//innate immune response	K01312//trypsin [EC:3.4.21.4]	gi|308193325|ref|NP_001184027.1|//trypsin-3 isoform 4 preproprotein [Homo sapiens];gi|767955109|ref|XP_011516267.1|//PREDICTED: trypsin-3 isoform X1 [Homo sapiens];gi|21536452|ref|NP_002762.2|//trypsin-3 isoform 2 preproprotein [Homo sapiens];gi|342672030|ref|NP_001184026.2|//trypsin-3 isoform 3 preproprotein [Homo sapiens];gi|170296790|ref|NP_031369.2|//trypsin-3 isoform 1 preproprotein [Homo sa…
7079	1667	317.081	627.773	0.985392	1.57e-26	*	1.82e-28	TIMP4	GO:0005615//extracellular space;GO:0030017//sarcomere;GO:0005578//proteinaceous extracellular matrix	GO:0002020//protease binding;GO:0046872//metal ion binding;GO:0008191//metalloendopeptidase inhibitor activity	GO:0042493//response to drug;GO:0034097//response to cytokine;GO:0043434//response to peptide hormone;GO:0032496//response to lipopolysaccharide;GO:0007417//central nervous system development;GO:0042698//ovulation cycle	K16866//metalloproteinase inhibitor 3	gi|4507515|ref|NP_003247.1|//metalloproteinase inhibitor 4 precursor [Homo sapiens]
23617	1832	3.23606	6.40647	0.985292	0.0584374	*	0.0180503	TSSK2	GO:0005814//centriole;GO:0005634//nucleus;GO:0001669//acrosomal vesicle	GO:0000287//magnesium ion binding;GO:0004674//protein serine/threonine kinase activity;GO:0005515//protein binding;GO:0005524//ATP binding	GO:0007275//multicellular organismal development;GO:0007286//spermatid development;GO:0046777//protein autophosphorylation	K08811//testis-specific serine kinase [EC:2.7.11.1]	gi|194294513|ref|NP_443732.3|//testis-specific serine/threonine-protein kinase 2 [Homo sapiens]
113730	3008	23.1989	45.926	0.985257	0.00223473	*	0.000437498	KLHDC7B	GO:0031463//Cul3-RING ubiquitin ligase complex	GO:0004842//ubiquitin-protein transferase activity	NA	K10476//kelch repeat and BTB domain-containing protein 11	gi|206597556|ref|NP_612442.2|//kelch domain-containing protein 7B [Homo sapiens]
8353	462	6.80198	13.4593	0.98458	0.0417774	*	0.0122249	HIST1H3E	GO:0016020//membrane;GO:0070062//extracellular vesicular exosome;GO:0000784//nuclear chromosome, telomeric region;GO:0005654//nucleoplasm;GO:0005913//cell-cell adherens junction;GO:0000788//nuclear nucleosome	GO:0042393//histone binding;GO:0003677//DNA binding;GO:0098641//cadherin binding involved in cell-cell adhesion;GO:0046982//protein heterodimerization activity	GO:0060968//regulation of gene silencing;GO:0007596//blood coagulation;GO:0051320//S phase;GO:0006334//nucleosome assembly	K11253//histone H3	gi|281345292|gb|EFB20876.1|//hypothetical protein PANDA_018573, partial [Ailuropoda melanoleuca]
26585	4145	451.818	892.732	0.982486	4.99e-39	*	3.14e-41	GREM1	GO:0005615//extracellular space;GO:0009986//cell surface	GO:0005125//cytokine activity;GO:0030297//transmembrane receptor protein tyrosine kinase activator activity;GO:0048018//receptor agonist activity;GO:0036122//BMP binding;GO:0043184//vascular endothelial growth factor receptor 2 binding;GO:0016015//morphogen activity	GO:0032872//regulation of stress-activated MAPK cascade;GO:0010717//regulation of epithelial to mesenchymal transition;GO:0003257//positive regulation of transcription from RNA polymerase II promoter involved in myocardial precursor cell differentiation;GO:0030199//collagen fibril organization;GO:0002092//positive regulation of receptor internalization;GO:0051973//positive regulation of telomeras…	K19558//neuroblastoma suppressor of tumorigenicity 1;K01645//cerberus 1	gi|300797307|ref|NP_001178251.1|//gremlin-1 isoform 3 [Homo sapiens];gi|803310642|ref|XP_012013671.1|//PREDICTED: gremlin-1 isoform X2 [Ovis aries musimon];gi|300797328|ref|NP_001178252.1|//gremlin-1 isoform 2 precursor [Homo sapiens]
4973	2533	78.9513	155.294	0.975969	3.01e-07	*	2.66e-08	OLR1	GO:0070062//extracellular vesicular exosome;GO:0005654//nucleoplasm;GO:0005887//integral component of plasma membrane;GO:0045121//membrane raft;GO:0043235//receptor complex	GO:0005041//low-density lipoprotein receptor activity;GO:0030246//carbohydrate binding;GO:0005515//protein binding	GO:0007159//leukocyte cell-cell adhesion;GO:0007596//blood coagulation;GO:0050900//leukocyte migration;GO:0008219//cell death;GO:0042542//response to hydrogen peroxide;GO:0006954//inflammatory response;GO:0008015//blood circulation;GO:0006508//proteolysis;GO:0042157//lipoprotein metabolic process	K08763//oxidised low-density lipoprotein receptor 1	gi|4505501|ref|NP_002534.1|//oxidized low-density lipoprotein receptor 1 isoform 1 [Homo sapiens];gi|290654344|ref|NP_001166104.1|//oxidized low-density lipoprotein receptor 1 isoform 3 [Homo sapiens];gi|290654342|ref|NP_001166103.1|//oxidized low-density lipoprotein receptor 1 isoform 2 [Homo sapiens]
8747	2666	13.836	27.0128	0.965213	0.0158218	*	0.00394113	ADAM21	GO:0030424//axon;GO:0016021//integral component of membrane;GO:0005886//plasma membrane;GO:0043025//neuronal cell body	GO:0004222//metalloendopeptidase activity;GO:0008270//zinc ion binding	GO:0006508//proteolysis;GO:0007338//single fertilization	K08610//disintegrin and metalloproteinase domain-containing protein 21 [EC:3.4.24.-]	gi|333033779|ref|NP_003804.2|//disintegrin and metalloproteinase domain-containing protein 21 preproprotein [Homo sapiens]
27286	2206	38.4907	74.8648	0.959776	0.00018719	*	2.84e-05	SRPX2	GO:0005615//extracellular space;GO:0009986//cell surface;GO:0060076//excitatory synapse;GO:0030054//cell junction;GO:0005737//cytoplasm;GO:0097060//synaptic membrane	GO:0036458//hepatocyte growth factor binding;GO:0042802//identical protein binding;GO:0005102//receptor binding	GO:0042325//regulation of phosphorylation;GO:0090050//positive regulation of cell migration involved in sprouting angiogenesis	K19408//sushi repeat-containing protein SRPX2	gi|7657619|ref|NP_055282.1|//sushi repeat-containing protein SRPX2 precursor [Homo sapiens]
255324	2931	488.068	946.629	0.955716	1.66e-36	*	1.2e-38	EPGN	GO:0005615//extracellular space;GO:0005887//integral component of plasma membrane;GO:0005622//intracellular	GO:0008083//growth factor activity;GO:0005154//epidermal growth factor receptor binding	GO:0000187//activation of MAPK activity;GO:0001525//angiogenesis;GO:0045741//positive regulation of epidermal growth factor-activated receptor activity;GO:0045840//positive regulation of mitosis;GO:0050679//positive regulation of epithelial cell proliferation	K13403//methylenetetrahydrofolate dehydrogenase(NAD+) / 5,10-methenyltetrahydrofolate cyclohydrolase [EC:1.5.1.15 3.5.4.9]	gi|401782589|ref|NP_001257920.1|//epigen isoform 3 precursor [Homo sapiens] ;gi|694907107|ref|XP_009445888.1|//PREDICTED: epigen isoform X1 [Pan troglodytes];gi|401782591|ref|NP_001257922.1|//epigen isoform 5 precursor [Homo sapiens];gi|336176024|ref|NP_001229552.1|//epigen precursor [Pan troglodytes];gi|401782585|ref|NP_001257919.1|//epigen isoform 2 precursor [Homo sapiens];gi|401782587|ref|NP_…
2512	889	19304.2	37422.6	0.955	7.76e-255	*	9.22e-259	FTL	GO:0016020//membrane;GO:0070062//extracellular vesicular exosome;GO:0005829//cytosol;GO:0008043//intracellular ferritin complex	GO:0042802//identical protein binding;GO:0008199//ferric iron binding	GO:0006879//cellular iron ion homeostasis;GO:0055085//transmembrane transport;GO:0006826//iron ion transport;GO:0006892//post-Golgi vesicle-mediated transport;GO:0008219//cell death	K13625//ferritin light chain	gi|20149498|ref|NP_000137.2|//ferritin light chain [Homo sapiens]
51450	1208	35.4151	68.568	0.953172	0.000319666	*	5.11e-05	PRRX2	GO:0005634//nucleus	GO:0043565//sequence-specific DNA binding;GO:0003700//sequence-specific DNA binding transcription factor activity	GO:0006355//regulation of transcription, DNA-templated;GO:0002053//positive regulation of mesenchymal cell proliferation;GO:0051216//cartilage development;GO:0030326//embryonic limb morphogenesis;GO:0048701//embryonic cranial skeleton morphogenesis;GO:0048844//artery morphogenesis;GO:0042474//middle ear morphogenesis;GO:0042472//inner ear morphogenesis;GO:0045880//positive regulation of smoothene…	K09329//paired mesoderm homeobox protein	gi|635070655|ref|XP_008004154.1|//PREDICTED: paired mesoderm homeobox protein 2 isoform X2 [Chlorocebus sabaeus];gi|7706659|ref|NP_057391.1|//paired mesoderm homeobox protein 2 [Homo sapiens]
8061	1688	131.152	253.708	0.95193	2.97e-11	*	1.48e-12	FOSL1	GO:0005634//nucleus;GO:0005829//cytosol;GO:0042734//presynaptic membrane;GO:0043005//neuron projection	GO:0000978//RNA polymerase II core promoter proximal region sequence-specific DNA binding;GO:0005515//protein binding;GO:0001077//RNA polymerase II core promoter proximal region sequence-specific DNA binding transcription factor activity involved in positive regulation of transcription	GO:0034097//response to cytokine;GO:0032570//response to progesterone;GO:0007296//vitellogenesis;GO:0009629//response to gravity;GO:0006357//regulation of transcription from RNA polymerase II promoter;GO:0043065//positive regulation of apoptotic process;GO:0051091//positive regulation of sequence-specific DNA binding transcription factor activity;GO:0006935//chemotaxis;GO:0008285//negative regula…	K04502//fos-like antigen 1	gi|664806094|ref|NP_001287786.1|//fos-related antigen 1 isoform 5 [Homo sapiens] ;gi|4885243|ref|NP_005429.1|//fos-related antigen 1 isoform 1 [Homo sapiens];gi|664806090|ref|NP_001287784.1|//fos-related antigen 1 isoform 3 [Homo sapiens];gi|664806071|ref|NP_001287773.1|//fos-related antigen 1 isoform 2 [Homo sapiens];gi|664806092|ref|NP_001287785.1|//fos-related antigen 1 isoform 4 [Homo sapiens]
79094	1601	134.365	259.804	0.951262	5.34e-12	*	2.43e-13	CHAC1	GO:0005829//cytosol;GO:0005802//trans-Golgi network	GO:0003839//gamma-glutamylcyclotransferase activity;GO:0005112//Notch binding	GO:0010955//negative regulation of protein processing;GO:0006986//response to unfolded protein;GO:0022008//neurogenesis;GO:0070059//intrinsic apoptotic signaling pathway in response to endoplasmic reticulum stress;GO:0045746//negative regulation of Notch signaling pathway	K07232//cation transport protein ChaC	gi|218563700|ref|NP_001136248.1|//glutathione-specific gamma-glutamylcyclotransferase 1 isoform b [Homo sapiens];gi|218563698|ref|NP_077016.2|//glutathione-specific gamma-glutamylcyclotransferase 1 isoform a [Homo sapiens]
4210	3151	20.2228	38.927	0.944791	0.00749557	*	0.00169531	MEFV	GO:0001726//ruffle;GO:0005634//nucleus;GO:0005874//microtubule;GO:0005875//microtubule associated complex;GO:0005829//cytosol;GO:0031410//cytoplasmic vesicle;GO:0005776//autophagic vacuole;GO:0030027//lamellipodium	GO:0003779//actin binding;GO:0008270//zinc ion binding	GO:0032695//negative regulation of interleukin-12 production;GO:2001056//positive regulation of cysteine-type endopeptidase activity;GO:0032691//negative regulation of interleukin-1 beta production;GO:0050728//negative regulation of inflammatory response;GO:0071641//negative regulation of macrophage inflammatory protein 1 alpha production;GO:0006508//proteolysis;GO:0035872//nucleotide-binding dom…	K12803//pyrin	gi|309384276|ref|NP_001185465.1|//pyrin isoform 2 [Homo sapiens];gi|4557743|ref|NP_000234.1|//pyrin isoform 1 [Homo sapiens]
5618	3766	17.1883	32.9603	0.939305	0.013032	*	0.0031812	PRLR	GO:0009986//cell surface;GO:0005576//extracellular region;GO:0016021//integral component of membrane;GO:0031904//endosome lumen;GO:0005886//plasma membrane	GO:0046872//metal ion binding;GO:0004925//prolactin receptor activity;GO:0017046//peptide hormone binding;GO:0042978//ornithine decarboxylase activator activity;GO:0042803//protein homodimerization activity	GO:0006694//steroid biosynthetic process;GO:0007171//activation of transmembrane receptor protein tyrosine kinase activity;GO:0007595//lactation;GO:0042110//T cell activation;GO:0038161//prolactin signaling pathway;GO:0043066//negative regulation of apoptotic process;GO:0007566//embryo implantation;GO:0060397//JAK-STAT cascade involved in growth hormone signaling pathway	K05081//prolactin receptor	gi|324073330|ref|NP_001191245.1|//prolactin receptor isoform 3 precursor [Homo sapiens];gi|324073311|ref|NP_001191244.1|//prolactin receptor isoform 2 precursor [Homo sapiens];gi|324073363|ref|NP_001191247.1|//prolactin receptor isoform 5 precursor [Homo sapiens];gi|119576321|gb|EAW55917.1|//prolactin receptor, isoform CRA_e [Homo sapiens];gi|268373736|gb|ACZ04321.1|//prolactin receptor short iso…
4312	2081	3.75334	7.19523	0.938867	0.0754938	*	0.0245026	MMP1	GO:0005578//proteinaceous extracellular matrix	GO:0004252//serine-type endopeptidase activity;GO:0004222//metalloendopeptidase activity;GO:0005509//calcium ion binding;GO:0008270//zinc ion binding	GO:0022617//extracellular matrix disassembly;GO:0006508//proteolysis;GO:0007596//blood coagulation;GO:0050900//leukocyte migration;GO:0019048//modulation by virus of host morphology or physiology;GO:0030574//collagen catabolic process	K01388//matrix metalloproteinase-1 (interstitial collagenase) [EC:3.4.24.7]	gi|4505215|ref|NP_002412.1|//interstitial collagenase isoform 1 preproprotein [Homo sapiens];gi|58176727|pdb|1SU3|A//Chain A, X-Ray Structure Of Human Prommp-1: New Insights Into Collagenase Action
133	1606	78.7235	150.567	0.935538	2.78e-07	*	2.44e-08	ADM	GO:0005615//extracellular space;GO:0005829//cytosol	GO:0031700//adrenomedullin receptor binding;GO:0005179//hormone activity	GO:0031100//organ regeneration;GO:0045906//negative regulation of vasoconstriction;GO:0043116//negative regulation of vascular permeability;GO:0060712//spongiotrophoblast layer development;GO:0045766//positive regulation of angiogenesis;GO:0030819//positive regulation of cAMP biosynthetic process;GO:0008285//negative regulation of cell proliferation;GO:0009611//response to wounding;GO:0046879//ho…	K12333//adrenomedullin	gi|4501945|ref|NP_001115.1|//ADM precursor [Homo sapiens]
766	1540	6.75441	12.8385	0.92657	0.0618841	*	0.0193064	CA7	GO:0005829//cytosol	GO:0004089//carbonate dehydratase activity;GO:0008270//zinc ion binding	GO:0015701//bicarbonate transport;GO:0006730//one-carbon metabolic process	K01672//carbonic anhydrase [EC:4.2.1.1]	gi|767990498|ref|XP_011521613.1|//PREDICTED: carbonic anhydrase 7 isoform X2 [Homo sapiens];gi|62240989|ref|NP_001014435.1|//carbonic anhydrase 7 isoform 2 [Homo sapiens];gi|4885101|ref|NP_005173.1|//carbonic anhydrase 7 isoform 1 [Homo sapiens]
81607	3433	38.0372	72.2839	0.926265	0.000319666	*	5.11e-05	NECTIN4	GO:0070062//extracellular vesicular exosome;GO:0005887//integral component of plasma membrane;GO:0005913//cell-cell adherens junction	GO:0050839//cell adhesion molecule binding;GO:0005102//receptor binding;GO:0001618//virus receptor activity;GO:0042803//protein homodimerization activity	GO:0007155//cell adhesion;GO:0034329//cell junction assembly;GO:0034332//adherens junction organization;GO:0019048//modulation by virus of host morphology or physiology	K06593//poliovirus receptor-related 4	gi|222136611|ref|NP_112178.2|//nectin-4 precursor [Homo sapiens];gi|119573051|gb|EAW52666.1|//poliovirus receptor-related 4, isoform CRA_b [Homo sapiens]
64115	4774	64.0158	121.419	0.923499	3.85e-06	*	4.13e-07	C10orf54	GO:0009897//external side of plasma membrane;GO:0005911//cell-cell junction;GO:0016021//integral component of membrane	NA	NA	NA	gi|62339432|ref|NP_071436.1|//platelet receptor Gi24 precursor [Homo sapiens]
6273	970	121.202	229.509	0.921143	2.7e-09	*	1.75e-10	S100A2	NA	GO:0005509//calcium ion binding;GO:0042802//identical protein binding	GO:0043542//endothelial cell migration	K21128//null;K17274//calpactin-1 light chain	gi|114152869|sp|P29034.3|S10A2_HUMAN//RecName: Full=Protein S100-A2; AltName: Full=CAN19; AltName: Full=Protein S-100L; AltName: Full=S100 calcium-binding protein A2
8710	1951	12.0727	22.8288	0.919111	0.0291776	*	0.00801817	SERPINB7	GO:0005615//extracellular space;GO:0005737//cytoplasm	GO:0004867//serine-type endopeptidase inhibitor activity	GO:0010951//negative regulation of endopeptidase activity;GO:0030162//regulation of proteolysis	K13964//serpin B7	gi|387912532|ref|NP_001248760.1|//serpin B7 isoform 2 [Homo sapiens] ;gi|4505149|ref|NP_003775.1|//serpin B7 isoform 1 [Homo sapiens]
3162	1606	554.139	1047.44	0.918555	5.22e-37	*	3.69e-39	HMOX1	GO:0005615//extracellular space;GO:0005901//caveola;GO:0005730//nucleolus;GO:0005829//cytosol;GO:0016021//integral component of membrane;GO:0005789//endoplasmic reticulum membrane;GO:0048471//perinuclear region of cytoplasm	GO:0004630//phospholipase D activity;GO:0020037//heme binding;GO:0046872//metal ion binding;GO:0004392//heme oxygenase (decyclizing) activity;GO:0004871//signal transducer activity;GO:0019899//enzyme binding;GO:0042803//protein homodimerization activity	GO:0002686//negative regulation of leukocyte migration;GO:0006879//cellular iron ion homeostasis;GO:0008217//regulation of blood pressure;GO:0071456//cellular response to hypoxia;GO:0035094//response to nicotine;GO:0043305//negative regulation of mast cell degranulation;GO:0043433//negative regulation of sequence-specific DNA binding transcription factor activity;GO:0051260//protein homooligomeri…	K00510//heme oxygenase [EC:1.14.99.3]	gi|4504437|ref|NP_002124.1|//heme oxygenase 1 [Homo sapiens]
477	5496	2.7558	5.2039	0.917124	0.0806635	*	0.0264727	ATP1A2	GO:0030315//T-tubule;GO:0043209//myelin sheath;GO:1903561//extracellular vesicle;GO:0005768//endosome;GO:0005901//caveola;GO:0005890//sodium:potassium-exchanging ATPase complex;GO:0005829//cytosol;GO:0043197//dendritic spine;GO:0014704//intercalated disc	GO:0005391//sodium:potassium-exchanging ATPase activity;GO:0030955//potassium ion binding;GO:0005524//ATP binding;GO:0008144//drug binding;GO:0051087//chaperone binding;GO:0031402//sodium ion binding;GO:1990239//steroid hormone binding	GO:0008217//regulation of blood pressure;GO:0008542//visual learning;GO:0035094//response to nicotine;GO:0019229//regulation of vasoconstriction;GO:0071260//cellular response to mechanical stimulus;GO:0008344//adult locomotory behavior;GO:0002087//regulation of respiratory gaseous exchange by neurological system process;GO:0006754//ATP biosynthetic process;GO:0045988//negative regulation of stria…	K01539//sodium/potassium-transporting ATPase subunit alpha [EC:3.6.3.9]	gi|4502271|ref|NP_000693.1|//sodium/potassium-transporting ATPase subunit alpha-2 precursor [Homo sapiens]
5054	3005	238.095	448.977	0.915105	4.52e-17	*	1.21e-18	SERPINE1	GO:0031012//extracellular matrix;GO:0031093//platelet alpha granule lumen;GO:0070062//extracellular vesicular exosome;GO:0005615//extracellular space;GO:0005886//plasma membrane	GO:0002020//protease binding;GO:0004867//serine-type endopeptidase inhibitor activity;GO:0005102//receptor binding	GO:0010951//negative regulation of endopeptidase activity;GO:0050829//defense response to Gram-negative bacterium;GO:0042127//regulation of cell proliferation;GO:0071222//cellular response to lipopolysaccharide;GO:0030168//platelet activation;GO:0051918//negative regulation of fibrinolysis;GO:0007179//transforming growth factor beta receptor signaling pathway;GO:0035491//positive regulation of le…	K03982//plasminogen activator inhibitor-1	gi|10835159|ref|NP_000593.1|//plasminogen activator inhibitor 1 precursor [Homo sapiens]
54742	1327	2830.76	5326.76	0.91207	2.92e-126	*	2.25e-129	LY6K	GO:0005576//extracellular region;GO:0016021//integral component of membrane;GO:0005737//cytoplasm;GO:0005886//plasma membrane;GO:0031225//anchored component of membrane	NA	NA	NA	gi|237858797|ref|NP_001153827.1|//lymphocyte antigen 6K isoform 3 precursor [Homo sapiens];gi|530389169|ref|XP_005251046.1|//PREDICTED: lymphocyte antigen 6K isoform X1 [Homo sapiens];gi|237858795|ref|NP_001153826.1|//lymphocyte antigen 6K isoform 2 precursor [Homo sapiens];gi|237820711|ref|NP_059997.3|//lymphocyte antigen 6K isoform 1 precursor [Homo sapiens];gi|530389171|ref|XP_005251047.1|//PR…
254439	1185	386.033	724.733	0.908726	7.62e-26	*	9.46e-28	C11orf86	NA	NA	NA	NA	gi|210147598|ref|NP_001129957.1|//uncharacterized protein C11orf86 [Homo sapiens]
115572	2391	231.23	433.978	0.90829	1.66e-16	*	4.68e-18	FAM46B	NA	GO:0005515//protein binding	NA	K05742//solute carrier family 9 (sodium/hydrogen exchanger), member 1	gi|209862821|ref|NP_443175.2|//protein FAM46B [Homo sapiens]
80726	4148	26.4149	49.3155	0.90069	0.00440994	*	0.000936926	KIAA1683	GO:0005634//nucleus;GO:0005739//mitochondrion	GO:0005515//protein binding	NA	NA	gi|224451032|ref|NP_001138776.1|//uncharacterized protein KIAA1683 isoform a [Homo sapiens] ;gi|54606862|ref|NP_079525.1|//uncharacterized protein KIAA1683 isoform b [Homo sapiens]
9047	1554	217.044	404.538	0.898286	2.15e-15	*	6.91e-17	SH2D2A	GO:0005829//cytosol	GO:0005070//SH3/SH2 adaptor activity;GO:0017124//SH3 domain binding	GO:0001525//angiogenesis;GO:0007165//signal transduction;GO:0008283//cell proliferation;GO:0030154//cell differentiation	K08273//SH2 domain protein 2A	gi|239787758|ref|NP_001154914.1|//SH2 domain-containing protein 2A isoform 3 [Homo sapiens];gi|239787750|ref|NP_003966.2|//SH2 domain-containing protein 2A isoform 2 [Homo sapiens];gi|239787752|ref|NP_001154913.1|//SH2 domain-containing protein 2A isoform 1 [Homo sapiens];gi|767910796|ref|XP_011508417.1|//PREDICTED: SH2 domain-containing protein 2A isoform X4 [Homo sapiens];gi|119573290|gb|EAW529…
6556	3646	10.1093	18.808	0.895657	0.0499434	*	0.0150741	SLC11A1	GO:0009279//cell outer membrane;GO:0005887//integral component of plasma membrane;GO:0031902//late endosome membrane;GO:0005764//lysosome;GO:0030670//phagocytic vesicle membrane;GO:0070821//tertiary granule membrane	GO:0005384//manganese ion transmembrane transporter activity;GO:0042803//protein homodimerization activity;GO:0051139//metal ion:proton antiporter activity	GO:0006879//cellular iron ion homeostasis;GO:0002606//positive regulation of dendritic cell antigen processing and presentation;GO:0000060//protein import into nucleus, translocation;GO:0007035//vacuolar acidification;GO:0006826//iron ion transport;GO:0001818//negative regulation of cytokine production;GO:0002827//positive regulation of T-helper 1 type immune response;GO:0006828//manganese ion tr…	K12347//natural resistance-associated macrophage protein	gi|675749046|ref|XP_008970184.1|//PREDICTED: natural resistance-associated macrophage protein 1 isoform X3 [Pan paniscus];gi|675665730|ref|XP_008997731.1|//PREDICTED: natural resistance-associated macrophage protein 1 isoform X4 [Callithrix jacchus];gi|109255241|ref|NP_000569.3|//natural resistance-associated macrophage protein 1 [Homo sapiens];gi|601894|dbj|BAA07370.1|//Nramp [Homo sapiens];gi|4…
57159	2073	12.0898	22.4755	0.894561	0.0373649	*	0.0107404	TRIM54	GO:0005874//microtubule;GO:0005875//microtubule associated complex;GO:0030018//Z disc	GO:0008270//zinc ion binding;GO:0004871//signal transducer activity;GO:0008017//microtubule binding	GO:0007165//signal transduction;GO:0030154//cell differentiation;GO:0007275//multicellular organismal development;GO:0007026//negative regulation of microtubule depolymerization	K10653//tripartite motif-containing protein 54	gi|78482627|ref|NP_115935.3|//tripartite motif-containing protein 54 isoform 1 [Homo sapiens];gi|78482626|ref|NP_912730.2|//tripartite motif-containing protein 54 isoform 2 [Homo sapiens]
92340	1758	6.39617	11.8778	0.892988	0.0789302	*	0.0257961	PRR29	NA	NA	NA	NA	gi|119614629|gb|EAW94223.1|//hCG1657684, isoform CRA_c [Homo sapiens] ;gi|300388164|ref|NP_001177960.1|//proline-rich protein 29 isoform 4 [Homo sapiens] ;gi|767996465|ref|XP_011523770.1|//PREDICTED: proline-rich protein 29 isoform X2 [Homo sapiens];gi|256000807|ref|NP_001157729.1|//proline-rich protein 29 isoform 2 [Homo sapiens];gi|675712721|ref|XP_008962026.1|//PREDICTED: proline-rich protein …
3976	3987	214.502	396.897	0.887776	1.73e-15	*	5.47e-17	LIF	GO:0005615//extracellular space;GO:0005737//cytoplasm	GO:0005146//leukemia inhibitory factor receptor binding;GO:0008083//growth factor activity;GO:0005125//cytokine activity;GO:0001135//RNA polymerase II transcription factor recruiting transcription factor activity	GO:0060708//spongiotrophoblast differentiation;GO:0060463//lung lobe morphogenesis;GO:0007566//embryo implantation;GO:0048666//neuron development;GO:0048861//leukemia inhibitory factor signaling pathway;GO:0045835//negative regulation of meiosis;GO:0045651//positive regulation of macrophage differentiation;GO:0008285//negative regulation of cell proliferation;GO:1900182//positive regulation of pr…	K05419//leukemia inhibitory factor	gi|380418324|ref|NP_001244064.1|//leukemia inhibitory factor isoform 2 [Homo sapiens];gi|4504991|ref|NP_002300.1|//leukemia inhibitory factor isoform 1 precursor [Homo sapiens]
54065	1026	28.6906	53.0657	0.887202	0.00754404	*	0.00170806	SMIM11A	GO:0016021//integral component of membrane	NA	NA	K10807//ribonucleoside-diphosphate reductase subunit M1 [EC:1.17.4.1]	gi|17158011|ref|NP_478062.1|//small integral membrane protein 11A [Homo sapiens]
145781	5307	46.6435	86.1647	0.88542	0.00093845	*	0.000167172	GCOM1	GO:0030864//cortical actin cytoskeleton;GO:0030018//Z disc;GO:0031234//extrinsic component of cytoplasmic side of plasma membrane;GO:0030054//cell junction;GO:0016591//DNA-directed RNA polymerase II, holoenzyme	GO:0005515//protein binding	GO:0035556//intracellular signal transduction	NA	gi|70166414|ref|NP_001018100.1|//GRINL1A combined protein isoform 1 [Homo sapiens];gi|553726985|ref|NP_001272829.1|//GRINL1A combined protein isoform 3 [Homo sapiens];gi|70166430|ref|NP_001018101.1|//GRINL1A combined protein isoform 2 [Homo sapiens]
57507	6255	14.3697	26.5323	0.884718	0.0276222	*	0.00751693	ZNF608	NA	GO:0046872//metal ion binding	NA	K10847//DNA-repair protein complementing XP-A cells	gi|530380057|ref|XP_005272096.1|//PREDICTED: zinc finger protein 608 isoform X2 [Homo sapiens];gi|767936222|ref|XP_011541824.1|//PREDICTED: zinc finger protein 608 isoform X6 [Homo sapiens];gi|530380059|ref|XP_005272097.1|//PREDICTED: zinc finger protein 608 isoform X5 [Homo sapiens];gi|153945755|ref|NP_065798.2|//zinc finger protein 608 [Homo sapiens]
116535	2335	74.5126	137.543	0.884324	1.04e-05	*	1.21e-06	MRGPRF	GO:0070062//extracellular vesicular exosome;GO:0031965//nuclear membrane;GO:0005887//integral component of plasma membrane	GO:0004930//G-protein coupled receptor activity	NA	K08394//Mas-related G protein-coupled receptor member F	gi|148664199|ref|NP_001091985.1|//mas-related G-protein coupled receptor member F [Homo sapiens]
54206	3193	655.911	1210.58	0.884122	6.82e-39	*	4.33e-41	ERRFI1	GO:0005634//nucleus;GO:0005829//cytosol;GO:0031234//extrinsic component of cytoplasmic side of plasma membrane	GO:0031267//small GTPase binding;GO:0017124//SH3 domain binding;GO:0005096//GTPase activator activity;GO:0019901//protein kinase binding	GO:0043589//skin morphogenesis;GO:0060428//lung epithelium development;GO:0006950//response to stress;GO:0060426//lung vasculature development;GO:0031953//negative regulation of protein autophosphorylation;GO:0045616//regulation of keratinocyte differentiation;GO:0048286//lung alveolus development;GO:0007175//negative regulation of epidermal growth factor-activated receptor activity	K08886//activated CDC42 kinase 1 [EC:2.7.10.2 2.7.11.1]	gi|10047086|ref|NP_061821.1|//ERBB receptor feedback inhibitor 1 [Homo sapiens]
653659	1706	61.8465	114.098	0.883504	0.000227649	*	3.52e-05	TMEM183B	GO:0016021//integral component of membrane	GO:0005515//protein binding	NA	K11824//AP-2 complex subunit alpha	gi|119369512|ref|NP_001073277.1|//transmembrane protein 183B [Homo sapiens]
10974	672	1.63732	3.01431	0.880496	0.0707818	*	0.0226539	ADIRF	GO:0070062//extracellular vesicular exosome;GO:0005654//nucleoplasm;GO:0005737//cytoplasm	NA	GO:0045944//positive regulation of transcription from RNA polymerase II promoter;GO:0072719//cellular response to cisplatin;GO:0045600//positive regulation of fat cell differentiation;GO:0071478//cellular response to radiation;GO:2001023//regulation of response to drug	NA	gi|5802976|ref|NP_006820.1|//adipogenesis regulatory factor [Homo sapiens]
10650	1733	51.0158	93.9172	0.880446	0.000111802	*	1.6e-05	PRELID3A	GO:0005758//mitochondrial intermembrane space	GO:1990050//phosphatidic acid transporter activity;GO:0005515//protein binding	NA	NA	gi|215490116|ref|NP_001135878.1|//PRELI domain containing protein 3A isoform 2 [Homo sapiens] ;gi|38678528|ref|NP_006544.2|//PRELI domain containing protein 3A isoform 1 [Homo sapiens]
197257	2027	19.1069	35.0574	0.875621	0.0179623	*	0.0045543	LDHD	GO:0005743//mitochondrial inner membrane	GO:0005515//protein binding;GO:0004458//D-lactate dehydrogenase (cytochrome) activity;GO:0050660//flavin adenine dinucleotide binding	NA	K00102//D-lactate dehydrogenase (cytochrome) [EC:1.1.2.4]	gi|37595754|ref|NP_705690.2|//probable D-lactate dehydrogenase, mitochondrial isoform 1 precursor [Homo sapiens];gi|37595756|ref|NP_919417.1|//probable D-lactate dehydrogenase, mitochondrial isoform 2 precursor [Homo sapiens]
1800	2326	4.69036	8.60097	0.874801	0.101192	*	0.0345497	DPEP1	GO:0070062//extracellular vesicular exosome;GO:0005615//extracellular space;GO:0016324//apical plasma membrane;GO:0031528//microvillus membrane;GO:0031225//anchored component of membrane	GO:0070573//metallodipeptidase activity;GO:0005515//protein binding;GO:0043027//cysteine-type endopeptidase inhibitor activity involved in apoptotic process;GO:0072341//modified amino acid binding;GO:0008270//zinc ion binding;GO:0008239//dipeptidyl-peptidase activity;GO:0034235//GPI anchor binding	GO:0043154//negative regulation of cysteine-type endopeptidase activity involved in apoptotic process;GO:0071732//cellular response to nitric oxide;GO:0035690//cellular response to drug;GO:0030336//negative regulation of cell migration;GO:0043066//negative regulation of apoptotic process;GO:0016999//antibiotic metabolic process;GO:0006749//glutathione metabolic process;GO:0071277//cellular respon…	K01273//membrane dipeptidase [EC:3.4.13.19]	gi|4758190|ref|NP_004404.1|//dipeptidase 1 precursor [Homo sapiens];gi|767989530|ref|XP_011521228.1|//PREDICTED: dipeptidase 1 isoform X2 [Homo sapiens]
1514	1637	3028.94	5551.26	0.874002	4.02e-122	*	3.34e-125	CTSL	GO:0070062//extracellular vesicular exosome;GO:0005615//extracellular space;GO:0005634//nucleus;GO:0036021//endolysosome lumen	GO:0004252//serine-type endopeptidase activity;GO:0042393//histone binding;GO:0097655//serpin family protein binding;GO:0005518//collagen binding;GO:0001968//fibronectin binding;GO:0004197//cysteine-type endopeptidase activity;GO:0043394//proteoglycan binding	GO:0006508//proteolysis;GO:0019886//antigen processing and presentation of exogenous peptide antigen via MHC class II;GO:0071888//macrophage apoptotic process;GO:0045087//innate immune response;GO:0097067//cellular response to thyroid hormone stimulus;GO:0002250//adaptive immune response	K01365//cathepsin L [EC:3.4.22.15]	gi|384081596|ref|NP_001244902.1|//cathepsin L1 isoform 2 [Homo sapiens];gi|4503155|ref|NP_001903.1|//cathepsin L1 isoform 1 preproprotein [Homo sapiens];gi|767956359|ref|XP_011516565.1|//PREDICTED: cathepsin L1 isoform X2 [Homo sapiens]
7130	1439	18.6851	34.1278	0.869058	0.0179037	*	0.00453732	TNFAIP6	NA	GO:0005540//hyaluronic acid binding	GO:0007155//cell adhesion;GO:0007165//signal transduction;GO:0007267//cell-cell signaling;GO:0006954//inflammatory response	K19018//tumor necrosis factor-inducible gene 6 protein	gi|26051243|ref|NP_009046.2|//tumor necrosis factor-inducible gene 6 protein precursor [Homo sapiens]
10993	1620	4.34999	7.93644	0.867481	0.10732	*	0.0370373	SDS	GO:0005739//mitochondrion	GO:0003941//L-serine ammonia-lyase activity;GO:0004794//L-threonine ammonia-lyase activity;GO:0030170//pyridoxal phosphate binding;GO:0042803//protein homodimerization activity	GO:0033590//response to cobalamin;GO:0043200//response to amino acid;GO:0042866//pyruvate biosynthetic process;GO:0006094//gluconeogenesis;GO:0006565//L-serine catabolic process	K17989//L-serine/L-threonine ammonia-lyase [EC:4.3.1.17 4.3.1.19]	gi|119618461|gb|EAW98055.1|//serine dehydratase, isoform CRA_b [Homo sapiens]
85329	1733	3.29232	6.00408	0.866839	0.109265	*	0.0378512	LGALS12	GO:0005634//nucleus;GO:0005739//mitochondrion	GO:0030395//lactose binding	GO:0097193//intrinsic apoptotic signaling pathway	K10095//galectin-12	gi|216547832|ref|NP_001136010.1|//galectin-12 isoform 5 [Homo sapiens];gi|216547809|ref|NP_001136007.1|//galectin-12 isoform 1 [Homo sapiens];gi|216547818|ref|NP_001136009.1|//galectin-12 isoform 4 [Homo sapiens];gi|216547811|ref|NP_001136008.1|//galectin-12 isoform 3 [Homo sapiens];gi|20127659|ref|NP_149092.2|//galectin-12 isoform 2 [Homo sapiens]
23057	5562	53.7217	97.8717	0.865388	0.000141912	*	2.09e-05	NMNAT2	GO:0005770//late endosome;GO:0005802//trans-Golgi network;GO:0045202//synapse;GO:0000139//Golgi membrane	GO:0000309//nicotinamide-nucleotide adenylyltransferase activity;GO:0005524//ATP binding;GO:0004515//nicotinate-nucleotide adenylyltransferase activity	GO:0006767//water-soluble vitamin metabolic process;GO:0009435//NAD biosynthetic process	K06210//nicotinamide mononucleotide adenylyltransferase [EC:2.7.7.1 2.7.7.18]	gi|25141325|ref|NP_733820.1|//nicotinamide/nicotinic acid mononucleotide adenylyltransferase 2 isoform 2 [Homo sapiens];gi|24307989|ref|NP_055854.1|//nicotinamide/nicotinic acid mononucleotide adenylyltransferase 2 isoform 1 [Homo sapiens]
85236	861	1783.59	3243.74	0.862878	1.03e-87	*	1.65e-90	HIST1H2BK	GO:0070062//extracellular vesicular exosome;GO:0005615//extracellular space;GO:0005654//nucleoplasm;GO:0005737//cytoplasm;GO:0000788//nuclear nucleosome	GO:0003677//DNA binding;GO:0046982//protein heterodimerization activity	GO:0006334//nucleosome assembly;GO:0042742//defense response to bacterium	K11252//histone H2B	gi|18105048|ref|NP_542160.1|//histone H2B type 1-K [Homo sapiens]
22885	3971	345.671	628.234	0.861905	5.59e-19	*	1.23e-20	ABLIM3	GO:0001725//stress fiber;GO:0005737//cytoplasm;GO:0030027//lamellipodium	GO:0003779//actin binding;GO:0008270//zinc ion binding	GO:0045944//positive regulation of transcription from RNA polymerase II promoter;GO:0007010//cytoskeleton organization;GO:0007411//axon guidance	K07520//actin-binding LIM protein	gi|666335564|ref|NP_001287957.1|//actin-binding LIM protein 3 isoform 4 [Homo sapiens];gi|530380444|ref|XP_005268451.1|//PREDICTED: actin-binding LIM protein 3 isoform X3 [Homo sapiens];gi|666335582|ref|NP_001287947.1|//actin-binding LIM protein 3 isoform 2 [Homo sapiens];gi|7662330|ref|NP_055760.1|//actin-binding LIM protein 3 isoform 1 [Homo sapiens];gi|530380442|ref|XP_005268450.1|//PREDICTED:…
716	2793	242.568	440.78	0.861669	1.11e-15	*	3.43e-17	C1S	GO:0070062//extracellular vesicular exosome;GO:0072562//blood microparticle	GO:0004252//serine-type endopeptidase activity;GO:0005509//calcium ion binding;GO:0042802//identical protein binding	GO:0006958//complement activation, classical pathway;GO:0006508//proteolysis;GO:0045087//innate immune response	K01331//complement component 1, s subcomponent [EC:3.4.21.42]	gi|4502495|ref|NP_001725.1|//complement C1s subcomponent precursor [Homo sapiens]
7425	2586	15.6902	28.5101	0.861612	0.029286	*	0.00805567	VGF	GO:0005615//extracellular space;GO:0030133//transport vesicle	GO:0008083//growth factor activity;GO:0005184//neuropeptide hormone activity	GO:0009409//response to cold;GO:0032868//response to insulin;GO:0006091//generation of precursor metabolites and energy;GO:0051591//response to cAMP;GO:0002021//response to dietary excess;GO:0042742//defense response to bacterium;GO:0001541//ovarian follicle development;GO:0030073//insulin secretion;GO:0042593//glucose homeostasis;GO:0019953//sexual reproduction	NA	gi|17136078|ref|NP_003369.2|//neurosecretory protein VGF precursor [Homo sapiens]
4828	1043	403.776	731.923	0.858137	2.4e-25	*	3.14e-27	NMB	GO:0005887//integral component of plasma membrane;GO:0005829//cytosol;GO:0005576//extracellular region;GO:0042470//melanosome;GO:0043005//neuron projection	GO:0031710//neuromedin B receptor binding;GO:0005178//integrin binding;GO:0008201//heparin binding;GO:0005179//hormone activity	GO:0001649//osteoblast differentiation;GO:0030282//bone mineralization;GO:0046888//negative regulation of hormone secretion;GO:0042593//glucose homeostasis;GO:0046887//positive regulation of hormone secretion;GO:0007155//cell adhesion;GO:0050482//arachidonic acid secretion;GO:0008343//adult feeding behavior;GO:0007204//positive regulation of cytosolic calcium ion concentration;GO:0007218//neurope…	K05223//neuromedin B	gi|694961055|ref|XP_009428012.1|//PREDICTED: neuromedin-B isoform X2 [Pan troglodytes];gi|45505145|ref|NP_995580.1|//neuromedin-B isoform 2 preproprotein [Homo sapiens];gi|45505143|ref|NP_066563.2|//neuromedin-B isoform 1 preproprotein [Homo sapiens]
221662	2485	52.5779	95.2401	0.857114	0.000708112	*	0.000122188	RBM24	GO:0005634//nucleus;GO:0005737//cytoplasm	GO:0000166//nucleotide binding;GO:0003730//mRNA 3'-UTR binding	GO:0010830//regulation of myotube differentiation;GO:0043488//regulation of mRNA stability	K14411//RNA-binding protein Musashi	gi|767939476|ref|XP_011512690.1|//PREDICTED: RNA-binding protein 24 isoform X2 [Homo sapiens];gi|767939478|ref|XP_011512691.1|//PREDICTED: RNA-binding protein 24 isoform X3 [Homo sapiens];gi|767939474|ref|XP_011512689.1|//PREDICTED: RNA-binding protein 24 isoform X1 [Homo sapiens];gi|23308561|ref|NP_694565.1|//RNA-binding protein 24 isoform 2 [Homo sapiens];gi|221139802|ref|NP_001137414.1|//RNA-b…
7805	2240	60.9102	110.222	0.855655	4.17e-05	*	5.44e-06	LAPTM5	GO:0005765//lysosomal membrane;GO:0005887//integral component of plasma membrane	GO:0005515//protein binding	GO:0006810//transport	K12387//lysosomal-associated transmembrane protein	gi|767905921|ref|XP_011540400.1|//PREDICTED: lysosomal-associated transmembrane protein 5 isoform X1 [Homo sapiens];gi|5803056|ref|NP_006753.1|//lysosomal-associated transmembrane protein 5 [Homo sapiens]
162514	6130	3.31965	5.96982	0.846655	0.120319	*	0.0423307	TRPV3	GO:0016021//integral component of membrane;GO:0005886//plasma membrane;GO:0043235//receptor complex	GO:0042802//identical protein binding;GO:0005262//calcium channel activity	GO:0042636//negative regulation of hair cycle;GO:0009266//response to temperature stimulus	K04972//transient receptor potential cation channel subfamily V member 3	gi|21735483|ref|NP_659505.1|//transient receptor potential cation channel subfamily V member 3 isoform 2 [Homo sapiens];gi|384551638|ref|NP_001245134.1|//transient receptor potential cation channel subfamily V member 3 isoform 1 [Homo sapiens]
107987423	1257	386.423	693.678	0.844084	1.44e-22	*	2.4e-24	LOC107987423	GO:0005788//endoplasmic reticulum lumen;GO:0005615//extracellular space;GO:0005634//nucleus;GO:0005829//cytosol;GO:0048471//perinuclear region of cytoplasm	GO:0005515//protein binding;GO:0047374//methylumbelliferyl-acetate deacetylase activity;GO:0008144//drug binding;GO:0008270//zinc ion binding	GO:0060333//interferon-gamma-mediated signaling pathway;GO:0045926//negative regulation of growth;GO:0006878//cellular copper ion homeostasis;GO:0008152//metabolic process;GO:0035690//cellular response to drug;GO:0071294//cellular response to zinc ion;GO:0009636//response to toxic substance;GO:0036018//cellular response to erythropoietin;GO:0036016//cellular response to interleukin-3	K01044//carboxylesterase 1 [EC:3.1.1.1]	gi|221043708|dbj|BAH13531.1|//unnamed protein product [Homo sapiens]
64221	4316	12.0105	21.5558	0.84378	0.05467	*	0.0167506	ROBO3	GO:0030424//axon;GO:0016021//integral component of membrane	GO:0005515//protein binding	GO:0001764//neuron migration;GO:0016199//axon midline choice point recognition	K06755//roundabout, axon guidance receptor 3	gi|48476182|ref|NP_071765.2|//roundabout homolog 3 precursor [Homo sapiens]
4953	2098	2509.16	4500.79	0.842974	2.6e-108	*	3.09e-111	ODC1	GO:0005829//cytosol;GO:0048471//perinuclear region of cytoplasm	GO:0004586//ornithine decarboxylase activity;GO:0042803//protein homodimerization activity	GO:0001822//kidney development;GO:0006521//regulation of cellular amino acid metabolic process;GO:0009615//response to virus;GO:0008284//positive regulation of cell proliferation;GO:0033387//putrescine biosynthetic process from ornithine	K01581//ornithine decarboxylase [EC:4.1.1.17]	gi|152149219|pdb|2OO0|A//Chain A, A Structural Insight Into The Inhibition Of Human And Leishmania Donovani Ornithine Decarboxylases By 3-Aminooxy-1-Aminopropane
51393	1819	20.599	36.8854	0.840476	0.0166034	*	0.00415947	TRPV2	GO:0032584//growth cone membrane;GO:0009986//cell surface;GO:0044295//axonal growth cone;GO:0044297//cell body;GO:0005887//integral component of plasma membrane;GO:0042470//melanosome;GO:0030027//lamellipodium	GO:0005262//calcium channel activity	GO:0045773//positive regulation of axon extension;GO:0090280//positive regulation of calcium ion import;GO:0007600//sensory perception;GO:0009408//response to heat	K04971//transient receptor potential cation channel subfamily V member 2	gi|20127551|ref|NP_057197.2|//transient receptor potential cation channel subfamily V member 2 [Homo sapiens];gi|767992304|ref|XP_011522224.1|//PREDICTED: transient receptor potential cation channel subfamily V member 2 isoform X3 [Homo sapiens];gi|767992308|ref|XP_011522225.1|//PREDICTED: transient receptor potential cation channel subfamily V member 2 isoform X7 [Homo sapiens];gi|530410394|ref|…
1026	2180	2983.14	5340.18	0.840058	4.99e-110	*	5.04e-113	CDKN1A	GO:0000307//cyclin-dependent protein kinase holoenzyme complex;GO:0005654//nucleoplasm;GO:0005829//cytosol;GO:0048471//perinuclear region of cytoplasm;GO:0070557//PCNA-p21 complex	GO:0004861//cyclin-dependent protein serine/threonine kinase inhibitor activity;GO:0046872//metal ion binding;GO:0019912//cyclin-dependent protein kinase activating kinase activity;GO:0031625//ubiquitin protein ligase binding;GO:0030332//cyclin binding;GO:0032403//protein complex binding	GO:0031100//organ regeneration;GO:0000080//mitotic G1 phase;GO:0010629//negative regulation of gene expression;GO:0009636//response to toxic substance;GO:0030890//positive regulation of B cell proliferation;GO:0033158//regulation of protein import into nucleus, translocation;GO:0046685//response to arsenic-containing substance;GO:2000278//regulation of DNA biosynthetic process;GO:0097193//intrins…	K06625//cyclin-dependent kinase inhibitor 1A	gi|11386203|ref|NP_000380.1|//cyclin-dependent kinase inhibitor 1 isoform 1 [Homo sapiens];gi|614458211|ref|NP_001278478.1|//cyclin-dependent kinase inhibitor 1 isoform 2 [Homo sapiens]
6303	1146	909.933	1626.55	0.837985	1.12e-38	*	7.2e-41	SAT1	GO:0070062//extracellular vesicular exosome;GO:0005887//integral component of plasma membrane;GO:0005829//cytosol	GO:0005283//sodium:amino acid symporter activity;GO:0015182//L-asparagine transmembrane transporter activity;GO:0004145//diamine N-acetyltransferase activity;GO:0015106//bicarbonate transmembrane transporter activity;GO:0019531//oxalate transmembrane transporter activity;GO:0015301//anion:anion antiporter activity;GO:0015186//L-glutamine transmembrane transporter activity;GO:0005290//L-histidine …	GO:0009447//putrescine catabolic process;GO:0055085//transmembrane transport;GO:0001525//angiogenesis;GO:0008272//sulfate transport;GO:0015804//neutral amino acid transport;GO:0042127//regulation of cell proliferation;GO:0001504//neurotransmitter uptake;GO:0006596//polyamine biosynthetic process;GO:0044281//small molecule metabolic process	K00657//diamine N-acetyltransferase [EC:2.3.1.57]	gi|931611108|ref|XP_014198881.1|//PREDICTED: diamine acetyltransferase 1 isoform X1 [Pan paniscus];gi|149242333|pdb|2JEV|A//Chain A, Crystal Structure Of Human Spermine,Spermidine Acetyltransferase In Complex With A Bisubstrate Analog (N1- Acetylspermine-S-Coa).
116211	1047	140.57	250.984	0.836308	2.09e-09	*	1.33e-10	TM4SF19	GO:0016021//integral component of membrane	NA	NA	NA	gi|325974475|ref|NP_001191826.1|//transmembrane 4 L6 family member 19 isoform 2 [Homo sapiens];gi|325974477|ref|NP_001191827.1|//transmembrane 4 L6 family member 19 isoform 3 [Homo sapiens];gi|115511028|ref|NP_612470.2|//transmembrane 4 L6 family member 19 isoform 1 [Homo sapiens]
127294	5800	29.012	51.7674	0.835394	0.00684694	*	0.00153071	MYOM3	GO:0031430//M band	GO:0042803//protein homodimerization activity	NA	K12567//titin [EC:2.7.11.1]	gi|155969693|ref|NP_689585.3|//myomesin-3 [Homo sapiens]
3363	3318	14.682	26.1839	0.834634	0.043149	*	0.0127133	HTR7	GO:0005887//integral component of plasma membrane	GO:0004993//serotonin receptor activity	GO:0007623//circadian rhythm;GO:0008015//blood circulation;GO:0007268//synaptic transmission;GO:0007187//G-protein coupled receptor signaling pathway, coupled to cyclic nucleotide second messenger;GO:0007210//serotonin receptor signaling pathway	K04163//5-hydroxytryptamine receptor 7	gi|10880129|ref|NP_062873.1|//5-hydroxytryptamine receptor 7 isoform d [Homo sapiens];gi|4504547|ref|NP_000863.1|//5-hydroxytryptamine receptor 7 isoform a [Homo sapiens];gi|397510013|ref|XP_003825400.1|//PREDICTED: 5-hydroxytryptamine receptor 7 isoform X1 [Pan paniscus]
51316	1403	302.811	538.46	0.830422	1.05e-17	*	2.7e-19	PLAC8	NA	GO:0004622//lysophospholipase activity;GO:0030246//carbohydrate binding;GO:0005515//protein binding;GO:0003682//chromatin binding	GO:0016042//lipid catabolic process;GO:0009409//response to cold;GO:0042742//defense response to bacterium;GO:0043066//negative regulation of apoptotic process;GO:0045944//positive regulation of transcription from RNA polymerase II promoter;GO:0006644//phospholipid metabolic process;GO:0050873//brown fat cell differentiation;GO:0040015//negative regulation of multicellular organism growth;GO:0008…	K07188//hormone-sensitive lipase [EC:3.1.1.79]	gi|7706158|ref|NP_057703.1|//placenta-specific gene 8 protein [Homo sapiens]
144501	3878	2691.87	4773.07	0.826312	4.69e-109	*	5.29e-112	KRT80	GO:0045095//keratin filament;GO:0005737//cytoplasm;GO:0030057//desmosome	GO:0005515//protein binding;GO:0005198//structural molecule activity	NA	K07605//type II keratin, basic	gi|125628636|ref|NP_872313.2|//keratin, type II cytoskeletal 80 isoform K80 [Homo sapiens];gi|125628632|ref|NP_001074961.1|//keratin, type II cytoskeletal 80 isoform K80.1 [Homo sapiens];gi|530399828|ref|XP_005268733.1|//PREDICTED: keratin, type II cytoskeletal 80 isoform X1 [Homo sapiens]
136853	2587	29.9571	53.0813	0.825303	0.00702911	*	0.00157687	SSC4D	GO:0016020//membrane;GO:0070062//extracellular vesicular exosome	GO:0005044//scavenger receptor activity	NA	K13912//deleted in malignant brain tumors 1 protein	gi|18152779|ref|NP_542782.1|//scavenger receptor cysteine-rich domain-containing group B protein precursor [Homo sapiens]
653489	5892	5.52584	9.78537	0.824432	0.130463	*	0.046682	RGPD3	GO:0005622//intracellular	NA	GO:0000042//protein targeting to Golgi	K12172//E3 SUMO-protein ligase RanBP2	gi|767919369|ref|XP_011509981.1|//PREDICTED: ranBP2-like and GRIP domain-containing protein 3 isoform X2 [Homo sapiens];gi|221307607|ref|NP_001137485.1|//ranBP2-like and GRIP domain-containing protein 3 [Homo sapiens]
26579	2414	2.99845	5.30957	0.824378	0.130364	*	0.0466383	MYEOV	NA	NA	NA	NA	gi|648216337|ref|NP_001280223.1|//myeloma-overexpressed gene protein isoform 2 [Homo sapiens];gi|42794612|ref|NP_620123.2|//myeloma-overexpressed gene protein isoform 1 [Homo sapiens]
146206	4428	58.9274	104.29	0.823592	0.00013925	*	2.05e-05	CARMIL2	GO:0001726//ruffle;GO:0005911//cell-cell junction;GO:0031234//extrinsic component of cytoplasmic side of plasma membrane;GO:0045111//intermediate filament cytoskeleton;GO:0044354//macropinosome;GO:0001772//immunological synapse;GO:0030027//lamellipodium;GO:0008290//F-actin capping protein complex	GO:0005543//phospholipid binding;GO:0032403//protein complex binding	NA	K20493//null	gi|949474729|ref|NP_001303955.1|//leucine-rich repeat-containing protein 16C isoform 2 [Homo sapiens];gi|66392157|ref|NP_001013860.1|//leucine-rich repeat-containing protein 16C isoform 1 [Homo sapiens];gi|767989411|ref|XP_011521176.1|//PREDICTED: leucine-rich repeat-containing protein 16C isoform X1 [Homo sapiens]
196792	777	46.5683	82.3786	0.822922	0.000655022	*	0.000112094	FAM24B	GO:0005576//extracellular region	NA	NA	NA	gi|116006949|ref|NP_689857.2|//protein FAM24B precursor [Homo sapiens]
650	3192	305.044	539.081	0.821486	6.81e-18	*	1.72e-19	BMP2	GO:0005615//extracellular space;GO:0009986//cell surface;GO:0070724//BMP receptor complex	GO:0008083//growth factor activity;GO:0005125//cytokine activity;GO:0019211//phosphatase activator activity;GO:0046982//protein heterodimerization activity;GO:0005160//transforming growth factor beta receptor binding;GO:0070700//BMP receptor binding;GO:0004745//retinol dehydrogenase activity;GO:0046332//SMAD binding;GO:0039706//co-receptor binding	GO:0060129//thyroid-stimulating hormone-secreting cell differentiation;GO:0030335//positive regulation of cell migration;GO:0045666//positive regulation of neuron differentiation;GO:0045786//negative regulation of cell cycle;GO:0060317//cardiac epithelial to mesenchymal transition;GO:0035054//embryonic heart tube anterior/posterior pattern specification;GO:0001658//branching involved in ureteric …	K21283//null	gi|4557369|ref|NP_001191.1|//bone morphogenetic protein 2 preproprotein [Homo sapiens]
5673	1588	17.3128	30.5795	0.82072	0.0335382	*	0.00942958	PSG5	GO:0005576//extracellular region	GO:0005515//protein binding	GO:0007565//female pregnancy	K06500//pregnancy specific beta-1-glycoprotein	gi|194097367|ref|NP_002772.3|//pregnancy-specific beta-1-glycoprotein 5 precursor [Homo sapiens];gi|768010096|ref|XP_011525434.1|//PREDICTED: pregnancy-specific beta-1-glycoprotein 5 isoform X2 [Homo sapiens]
27128	3096	5.89193	10.3907	0.818484	0.120834	*	0.0425436	CYTH4	GO:0005829//cytosol;GO:0005886//plasma membrane;GO:0000139//Golgi membrane	GO:0008289//lipid binding;GO:0005515//protein binding;GO:0005086//ARF guanyl-nucleotide exchange factor activity	GO:0032012//regulation of ARF protein signal transduction;GO:0030155//regulation of cell adhesion;GO:0016192//vesicle-mediated transport	K18441//cytohesin	gi|7019505|ref|NP_037517.1|//cytohesin-4 isoform 1 [Homo sapiens];gi|768024665|ref|XP_011528450.1|//PREDICTED: cytohesin-4 isoform X2 [Homo sapiens]
83875	2846	16.0113	28.2179	0.817524	0.042988	*	0.0126633	BCO2	GO:0005759//mitochondrial matrix	GO:0016702//oxidoreductase activity, acting on single donors with incorporation of molecular oxygen, incorporation of two atoms of oxygen;GO:0046872//metal ion binding	GO:0042573//retinoic acid metabolic process;GO:0016116//carotenoid metabolic process;GO:0042574//retinal metabolic process;GO:2000377//regulation of reactive oxygen species metabolic process;GO:0016121//carotene catabolic process;GO:0051881//regulation of mitochondrial membrane potential;GO:0055114//oxidation-reduction process	K10252//beta,beta-carotene 9',10'-dioxygenase [EC:1.13.11.71]	gi|374081851|ref|NP_001243329.1|//beta,beta-carotene 9',10'-oxygenase isoform e [Homo sapiens];gi|189054864|dbj|BAG37705.1|//unnamed protein product [Homo sapiens];gi|374081843|ref|NP_114144.4|//beta,beta-carotene 9',10'-oxygenase isoform a [Homo sapiens];gi|374081847|ref|NP_001243326.1|//beta,beta-carotene 9',10'-oxygenase isoform c [Homo sapiens] ;gi|374081849|ref|NP_001243327.1|//beta,beta-car…
80008	2252	45.985	81.0182	0.817083	0.00104302	*	0.000187906	TMEM156	GO:0016021//integral component of membrane	NA	NA	NA	gi|13376423|ref|NP_079219.1|//transmembrane protein 156 isoform 1 [Homo sapiens];gi|767930473|ref|XP_011512054.1|//PREDICTED: transmembrane protein 156 isoform X4 [Homo sapiens];gi|735366766|ref|NP_001290157.1|//transmembrane protein 156 isoform 2 [Homo sapiens] ;gi|767930471|ref|XP_011512053.1|//PREDICTED: transmembrane protein 156 isoform X3 [Homo sapiens];gi|767930476|ref|XP_011512055.1|//PRED…
22795	5005	2774.62	4873.41	0.812642	1.06e-99	*	1.58e-102	NID2	GO:0070062//extracellular vesicular exosome;GO:0005604//basement membrane	GO:0005518//collagen binding;GO:0005509//calcium ion binding	GO:0007160//cell-matrix adhesion	K06826//nidogen (entactin)	gi|144953895|ref|NP_031387.3|//nidogen-2 precursor [Homo sapiens]
5552	1320	1989.91	3494.38	0.812337	1.7e-58	*	6.06e-61	SRGN	GO:0031093//platelet alpha granule lumen;GO:0005615//extracellular space;GO:0042588//zymogen granule;GO:0042629//mast cell granule;GO:0000139//Golgi membrane	GO:0005518//collagen binding	GO:0033373//maintenance of protease location in mast cell secretory granule;GO:0002576//platelet degranulation;GO:0016485//protein processing;GO:0030502//negative regulation of bone mineralization;GO:0033382//maintenance of granzyme B location in T cell secretory granule;GO:0030168//platelet activation;GO:0050710//negative regulation of cytokine secretion;GO:0006915//apoptotic process	K06849//proteoglycan peptide core protein	gi|190420|gb|AAA60179.1|//secretory granule proteoglycan peptide core [Homo sapiens];gi|45935371|ref|NP_002718.2|//serglycin precursor [Homo sapiens]
406	2766	241.376	423.494	0.811058	8.22e-14	*	3.14e-15	ARNTL	GO:0016605//PML body;GO:0005667//transcription factor complex;GO:0016604//nuclear body;GO:0033391//chromatoid body	GO:0001046//core promoter sequence-specific DNA binding;GO:0070888//E-box binding;GO:0046982//protein heterodimerization activity;GO:0070491//repressing transcription factor binding;GO:0017162//aryl hydrocarbon receptor binding;GO:0000982//RNA polymerase II core promoter proximal region sequence-specific DNA binding transcription factor activity;GO:0001190//RNA polymerase II transcription factor …	GO:0007165//signal transduction;GO:0042176//regulation of protein catabolic process;GO:0045944//positive regulation of transcription from RNA polymerase II promoter;GO:0000060//protein import into nucleus, translocation;GO:0032922//circadian regulation of gene expression	K02296//aryl hydrocarbon receptor nuclear translocator-like protein 1	gi|42716311|ref|NP_001169.3|//aryl hydrocarbon receptor nuclear translocator-like protein 1 isoform a [Homo sapiens];gi|578820539|ref|XP_006718296.1|//PREDICTED: aryl hydrocarbon receptor nuclear translocator-like protein 1 isoform X6 [Homo sapiens];gi|578820543|ref|XP_006718297.1|//PREDICTED: aryl hydrocarbon receptor nuclear translocator-like protein 1 isoform X7 [Homo sapiens];gi|635015046|ref…
5138	4252	17.2544	30.237	0.809351	0.0368266	*	0.0105466	PDE2A	GO:0005759//mitochondrial matrix;GO:0005634//nucleus;GO:0005783//endoplasmic reticulum;GO:0048471//perinuclear region of cytoplasm;GO:0045121//membrane raft;GO:0005829//cytosol;GO:0005794//Golgi apparatus;GO:0042734//presynaptic membrane	GO:0030552//cAMP binding;GO:0004118//cGMP-stimulated cyclic-nucleotide phosphodiesterase activity;GO:0042803//protein homodimerization activity;GO:0047555//3',5'-cyclic-GMP phosphodiesterase activity;GO:0030911//TPR domain binding;GO:0046872//metal ion binding;GO:0008144//drug binding;GO:0004115//3',5'-cyclic-AMP phosphodiesterase activity;GO:0005262//calcium channel activity;GO:0030553//cGMP bin…	GO:0070588//calcium ion transmembrane transport;GO:0007596//blood coagulation;GO:0035690//cellular response to drug;GO:0071260//cellular response to mechanical stimulus;GO:0050729//positive regulation of inflammatory response;GO:0000122//negative regulation of transcription from RNA polymerase II promoter;GO:0071560//cellular response to transforming growth factor beta stimulus;GO:0019934//cGMP-m…	K18283//cGMP-dependent 3',5'-cyclic phosphodiesterase [EC:3.1.4.17]	gi|219802706|ref|NP_001137311.1|//cGMP-dependent 3',5'-cyclic phosphodiesterase isoform PDE2A2 precursor [Homo sapiens];gi|4505657|ref|NP_002590.1|//cGMP-dependent 3',5'-cyclic phosphodiesterase isoform PDE2A3 [Homo sapiens];gi|344925852|ref|NP_001230713.1|//cGMP-dependent 3',5'-cyclic phosphodiesterase isoform PDE2A1 [Homo sapiens] ;gi|226246591|ref|NP_001139681.1|//cGMP-dependent 3',5'-cyclic p…
4846	3092	4.951	8.67311	0.808831	0.138847	*	0.0504239	NOS3	GO:0005856//cytoskeleton;GO:0010494//cytoplasmic stress granule;GO:0005634//nucleus;GO:0030666//endocytic vesicle membrane;GO:0000932//cytoplasmic mRNA processing body;GO:0000139//Golgi membrane;GO:0048471//perinuclear region of cytoplasm;GO:0005901//caveola;GO:0005829//cytosol	GO:0034618//arginine binding;GO:0003723//RNA binding;GO:0020037//heme binding;GO:0046870//cadmium ion binding;GO:0005506//iron ion binding;GO:0050660//flavin adenine dinucleotide binding;GO:0003785//actin monomer binding;GO:0004517//nitric-oxide synthase activity;GO:0097110//scaffold protein binding;GO:0050661//NADP binding;GO:0034617//tetrahydrobiopterin binding;GO:0010181//FMN binding;GO:000827…	GO:0043267//negative regulation of potassium ion transport;GO:0002028//regulation of sodium ion transport;GO:0007263//nitric oxide mediated signal transduction;GO:0014740//negative regulation of muscle hyperplasia;GO:0045776//negative regulation of blood pressure;GO:0031663//lipopolysaccharide-mediated signaling pathway;GO:0045766//positive regulation of angiogenesis;GO:0051346//negative regulati…	K13242//nitric-oxide synthase, endothelial [EC:1.14.13.39]	gi|40254422|ref|NP_000594.2|//nitric oxide synthase, endothelial isoform 1 [Homo sapiens];gi|578814287|ref|XP_006716065.1|//PREDICTED: nitric oxide synthase, endothelial isoform X1 [Homo sapiens];gi|231571314|ref|NP_001153581.1|//nitric oxide synthase, endothelial isoform 2 [Homo sapiens];gi|231571356|ref|NP_001153583.1|//nitric oxide synthase, endothelial isoform 4 [Homo sapiens];gi|221044204|db…
57149	1472	323.801	567.186	0.808717	2.8e-17	*	7.41e-19	LYRM1	GO:0045171//intercellular bridge;GO:0005654//nucleoplasm	NA	NA	K18441//cytohesin	gi|767988683|ref|XP_011544201.1|//PREDICTED: LYR motif-containing protein 1 isoform X2 [Homo sapiens];gi|10092683|ref|NP_065157.1|//LYR motif-containing protein 1 [Homo sapiens];gi|119587248|gb|EAW66844.1|//hypothetical protein A-211C6.1, isoform CRA_b [Homo sapiens];gi|767988685|ref|XP_011544202.1|//PREDICTED: LYR motif-containing protein 1 isoform X3 [Homo sapiens]
1893	2161	448.895	785.957	0.808073	5.66e-22	*	9.81e-24	ECM1	GO:0070062//extracellular vesicular exosome;GO:0005615//extracellular space;GO:0031089//platelet dense granule lumen;GO:0005578//proteinaceous extracellular matrix	GO:0002020//protease binding;GO:0008022//protein C-terminus binding;GO:0004871//signal transducer activity;GO:0005134//interleukin-2 receptor binding;GO:0043236//laminin binding	GO:0010466//negative regulation of peptidase activity;GO:0030502//negative regulation of bone mineralization;GO:2000404//regulation of T cell migration;GO:0006954//inflammatory response;GO:0043123//positive regulation of I-kappaB kinase/NF-kappaB signaling;GO:0006357//regulation of transcription from RNA polymerase II promoter;GO:0002828//regulation of type 2 immune response;GO:0001938//positive …	NA	gi|221316616|ref|NP_073155.2|//extracellular matrix protein 1 isoform 2 precursor [Homo sapiens];gi|322302700|ref|NP_001189787.1|//extracellular matrix protein 1 isoform 3 precursor [Homo sapiens];gi|221316614|ref|NP_004416.2|//extracellular matrix protein 1 isoform 1 precursor [Homo sapiens]
129049	5979	6.28863	11.0027	0.807039	0.127605	*	0.0454396	SGSM1	GO:0005794//Golgi apparatus	GO:0017137//Rab GTPase binding;GO:0005096//GTPase activator activity	NA	K20168//null	gi|148612840|ref|NP_001091967.1|//small G protein signaling modulator 1 isoform 3 [Homo sapiens];gi|148612875|ref|NP_001091968.1|//small G protein signaling modulator 1 isoform 4 [Homo sapiens];gi|90577164|ref|NP_597711.1|//small G protein signaling modulator 1 isoform 2 [Homo sapiens];gi|90577167|ref|NP_001035037.1|//small G protein signaling modulator 1 isoform 1 [Homo sapiens]
51330	1048	828.619	1449.15	0.806431	4.53e-37	*	3.17e-39	TNFRSF12A	GO:0001726//ruffle;GO:0009986//cell surface;GO:0016021//integral component of membrane;GO:0005886//plasma membrane	GO:0005515//protein binding	GO:0006931//substrate-dependent cell migration, cell attachment to substrate;GO:0045773//positive regulation of axon extension;GO:0001525//angiogenesis;GO:2001238//positive regulation of extrinsic apoptotic signaling pathway	K05149//tumor necrosis factor receptor superfamily member 12A	gi|7706186|ref|NP_057723.1|//tumor necrosis factor receptor superfamily member 12A precursor [Homo sapiens]
202374	4252	1.56945	2.74318	0.805589	0.0986656	*	0.0335701	STK32A	GO:0005622//intracellular;GO:0005886//plasma membrane	GO:0046872//metal ion binding;GO:0004674//protein serine/threonine kinase activity;GO:0005524//ATP binding	NA	K08793//serine/threonine kinase 32 [EC:2.7.11.1]	gi|567757514|ref|NP_001274669.1|//serine/threonine-protein kinase 32A isoform 3 [Homo sapiens] ;gi|767937570|ref|XP_011535879.1|//PREDICTED: serine/threonine-protein kinase 32A isoform X2 [Homo sapiens];gi|767937574|ref|XP_011535881.1|//PREDICTED: serine/threonine-protein kinase 32A isoform X4 [Homo sapiens];gi|21450709|ref|NP_659438.1|//serine/threonine-protein kinase 32A isoform 2 [Homo sapiens…
80117	1335	13.5441	23.6704	0.805424	0.0549375	*	0.0168456	ARL14	NA	GO:0005515//protein binding;GO:0005525//GTP binding	GO:0007264//small GTPase mediated signal transduction	K17200//ADP-ribosylation factor-like protein 14	gi|13376574|ref|NP_079323.1|//ADP-ribosylation factor-like protein 14 [Homo sapiens]
1583	1996	118.224	206.488	0.804541	3.93e-07	*	3.55e-08	CYP11A1	GO:0005759//mitochondrial matrix;GO:0005743//mitochondrial inner membrane	GO:0016709//oxidoreductase activity, acting on paired donors, with incorporation or reduction of molecular oxygen, NAD(P)H as one donor, and incorporation of one atom of oxygen;GO:0020037//heme binding;GO:0005506//iron ion binding;GO:0008386//cholesterol monooxygenase (side-chain-cleaving) activity	GO:0018894//dibenzo-p-dioxin metabolic process;GO:0001101//response to acid chemical;GO:0060135//maternal process involved in female pregnancy;GO:0018879//biphenyl metabolic process;GO:0021766//hippocampus development;GO:0071222//cellular response to lipopolysaccharide;GO:0071356//cellular response to tumor necrosis factor;GO:0010332//response to gamma radiation;GO:0014037//Schwann cell different…	K00498//cholesterol monooxygenase (side-chain-cleaving) [EC:1.14.15.6]	gi|153218646|ref|NP_000772.2|//cholesterol side-chain cleavage enzyme, mitochondrial isoform a precursor [Homo sapiens];gi|153218654|ref|NP_001093243.1|//cholesterol side-chain cleavage enzyme, mitochondrial isoform b [Homo sapiens]
8347	438	22.737	39.6941	0.803886	0.0280673	*	0.00765804	HIST1H2BC	GO:0070062//extracellular vesicular exosome;GO:0005615//extracellular space;GO:0005654//nucleoplasm;GO:0005737//cytoplasm;GO:0000788//nuclear nucleosome	GO:0003677//DNA binding;GO:0046982//protein heterodimerization activity	GO:0006334//nucleosome assembly;GO:0042742//defense response to bacterium	K11252//histone H2B	gi|829934945|ref|XP_012596776.1|//PREDICTED: histone H2B type 1-like [Microcebus murinus]
2354	3759	13.5574	23.6516	0.802861	0.0573535	*	0.0176716	FOSB	GO:0005634//nucleus	GO:0000978//RNA polymerase II core promoter proximal region sequence-specific DNA binding;GO:0001077//RNA polymerase II core promoter proximal region sequence-specific DNA binding transcription factor activity involved in positive regulation of transcription;GO:0008134//transcription factor binding	GO:0000122//negative regulation of transcription from RNA polymerase II promoter;GO:0007610//behavior;GO:0071277//cellular response to calcium ion;GO:0007275//multicellular organismal development	K09029//protein FosB	gi|166999613|ref|NP_006723.2|//protein fosB isoform 1 [Homo sapiens];gi|166999783|ref|NP_001107643.1|//protein fosB isoform 2 [Homo sapiens]
5794	3463	21.9405	38.2551	0.802052	0.0222848	*	0.00587522	PTPRH	GO:0005887//integral component of plasma membrane;GO:0005737//cytoplasm	GO:0005515//protein binding;GO:0005001//transmembrane receptor protein tyrosine phosphatase activity	GO:0006470//protein dephosphorylation;GO:0006915//apoptotic process	K18034//receptor-type tyrosine-protein phosphatase H [EC:3.1.3.48]	gi|768010341|ref|XP_011525485.1|//PREDICTED: receptor-type tyrosine-protein phosphatase H isoform X1 [Homo sapiens];gi|612407829|ref|NP_001154912.2|//receptor-type tyrosine-protein phosphatase H isoform 2 precursor [Homo sapiens];gi|768010354|ref|XP_011525489.1|//PREDICTED: receptor-type tyrosine-protein phosphatase H isoform X5 [Homo sapiens];gi|768010344|ref|XP_011525486.1|//PREDICTED: receptor…
80206	5203	51.0158	88.8667	0.800698	0.00114898	*	0.000209178	FHOD3	GO:0005856//cytoskeleton;GO:0030018//Z disc;GO:0005829//cytosol;GO:0005886//plasma membrane	GO:0003779//actin binding;GO:0017048//Rho GTPase binding;GO:0032794//GTPase activating protein binding	GO:0016477//cell migration;GO:0030837//negative regulation of actin filament polymerization;GO:0045214//sarcomere organization;GO:0008360//regulation of cell shape	K05745//diaphanous 3;K05741//diaphanous 2;K02184//formin 2	gi|767999286|ref|XP_011524491.1|//PREDICTED: FH1/FH2 domain-containing protein 3 isoform X1 [Homo sapiens];gi|767999300|ref|XP_011524498.1|//PREDICTED: FH1/FH2 domain-containing protein 3 isoform X9 [Homo sapiens];gi|767999294|ref|XP_011524495.1|//PREDICTED: FH1/FH2 domain-containing protein 3 isoform X5 [Homo sapiens];gi|528524522|ref|NP_001268668.1|//FH1/FH2 domain-containing protein 3 isoform …
147184	2079	240.659	418.307	0.797571	9.41e-14	*	3.62e-15	TMEM99	GO:0016021//integral component of membrane	NA	NA	NA	gi|116268113|ref|NP_660317.2|//transmembrane protein 99 precursor [Homo sapiens]
6006	1638	18.5633	32.2585	0.797225	0.0350945	*	0.00997341	RHCE	GO:0005887//integral component of plasma membrane	GO:0008519//ammonium transmembrane transporter activity	NA	K06579//Rhesus blood group glycoprotein	gi|301129227|ref|NP_065231.3|//blood group Rh(CE) polypeptide isoform 1 [Homo sapiens];gi|578799555|ref|XP_006710873.1|//PREDICTED: blood group Rh(CE) polypeptide isoform X5 [Homo sapiens];gi|28315976|tpe|CAD29850.1|//TPA: RhCE protein [Homo sapiens];gi|767905419|ref|XP_011540191.1|//PREDICTED: blood group Rh(CE) polypeptide isoform X2 [Homo sapiens];gi|301129225|ref|NP_619522.3|//blood group Rh(…
554282	2083	136.784	237.285	0.794726	0.016688	*	0.00419256	FAM72C	GO:0005739//mitochondrion	GO:0005515//protein binding	NA	NA	gi|565324168|ref|NP_001274314.1|//protein FAM72C [Homo sapiens]
26038	9663	2.55677	4.4266	0.791874	0.146335	*	0.0536889	CHD5	GO:0005665//DNA-directed RNA polymerase II, core complex;GO:0016581//NuRD complex;GO:0016021//integral component of membrane;GO:0000792//heterochromatin;GO:0005789//endoplasmic reticulum membrane	GO:0001221//transcription cofactor binding;GO:0003677//DNA binding;GO:0005524//ATP binding;GO:0008270//zinc ion binding;GO:0061628//H3K27me3 modified histone binding;GO:0008094//DNA-dependent ATPase activity;GO:0008026//ATP-dependent helicase activity	GO:0007399//nervous system development;GO:0006338//chromatin remodeling;GO:0006355//regulation of transcription, DNA-templated	K14435//chromodomain-helicase-DNA-binding protein 5 [EC:3.6.4.12]	gi|24308089|ref|NP_056372.1|//chromodomain-helicase-DNA-binding protein 5 [Homo sapiens]
65009	2757	82.2815	142.386	0.791167	3.69e-05	*	4.77e-06	NDRG4	GO:0016323//basolateral plasma membrane;GO:0031253//cell projection membrane;GO:0005829//cytosol;GO:0016021//integral component of membrane;GO:0005739//mitochondrion;GO:0005789//endoplasmic reticulum membrane;GO:0005737//cytoplasm	GO:0005515//protein binding	GO:0030154//cell differentiation;GO:0006950//response to stress;GO:0016049//cell growth	K18266//protein NDRG1	gi|338827670|ref|NP_001229762.1|//protein NDRG4 isoform 4 [Homo sapiens] ;gi|338827674|ref|NP_001229764.1|//protein NDRG4 isoform 6 [Homo sapiens];gi|694963862|ref|XP_009429168.1|//PREDICTED: protein NDRG4 isoform X5 [Pan troglodytes];gi|767990437|ref|XP_011521594.1|//PREDICTED: protein NDRG4 isoform X3 [Homo sapiens];gi|194440722|ref|NP_001123959.1|//protein NDRG4 isoform 2 [Homo sapiens] ;gi|33…
10799	1190	235.449	407.259	0.79053	1.31e-12	*	5.65e-14	RPP40	GO:0005654//nucleoplasm;GO:0005655//nucleolar ribonuclease P complex	GO:0004526//ribonuclease P activity	GO:0008033//tRNA processing	K14530//ribonucleases P/MRP protein subunit RPP40 [EC:3.1.26.5]	gi|554790364|ref|NP_001273061.1|//ribonuclease P protein subunit p40 isoform b [Homo sapiens];gi|55743132|ref|NP_006629.2|//ribonuclease P protein subunit p40 isoform a [Homo sapiens];gi|767939127|ref|XP_011512555.1|//PREDICTED: ribonuclease P protein subunit p40 isoform X1 [Homo sapiens];gi|554790388|ref|NP_001273062.1|//ribonuclease P protein subunit p40 isoform c [Homo sapiens]
107984813	1843	4.62204	7.99254	0.790124	0.154723	*	0.0575034	LOC107984813	NA	NA	NA	NA	gi|426382576|ref|XP_004057880.1|//PREDICTED: uncharacterized protein LOC101129876 [Gorilla gorilla gorilla]
128653	631	6.93548	11.9852	0.789184	0.133541	*	0.048053	C20orf141	GO:0016021//integral component of membrane	NA	NA	NA	gi|18152771|ref|NP_542777.1|//uncharacterized protein C20orf141 [Homo sapiens]
55679	1911	28.8846	49.8946	0.788585	0.0108612	*	0.00258292	LIMS2	GO:0005634//nucleus;GO:0005925//focal adhesion;GO:0005829//cytosol;GO:0005886//plasma membrane	GO:0005515//protein binding;GO:0008270//zinc ion binding	GO:0034329//cell junction assembly	K16682//LIM domain-containing protein;K05289//glycosylphosphatidylinositol transamidase;K05760//paxillin	gi|238776786|ref|NP_001154875.1|//LIM and senescent cell antigen-like-containing domain protein 2 isoform 3 [Homo sapiens];gi|238859658|ref|NP_001129509.2|//LIM and senescent cell antigen-like-containing domain protein 2 isoform 1 [Homo sapiens];gi|578804576|ref|XP_006712690.1|//PREDICTED: LIM and senescent cell antigen-like-containing domain protein 2 isoform X4 [Homo sapiens];gi|374858060|ref|N…
3855	1640	23774.9	40953.4	0.784547	4.51e-152	*	1.87e-155	KRT7	GO:0070062//extracellular vesicular exosome;GO:0005634//nucleus;GO:0045095//keratin filament;GO:0005737//cytoplasm	GO:0005515//protein binding;GO:0005198//structural molecule activity	GO:0007010//cytoskeleton organization;GO:0019048//modulation by virus of host morphology or physiology;GO:0006417//regulation of translation	K07605//type II keratin, basic	gi|767974195|ref|XP_011536627.1|//PREDICTED: keratin, type II cytoskeletal 7 isoform X1 [Homo sapiens];gi|67782365|ref|NP_005547.3|//keratin, type II cytoskeletal 7 [Homo sapiens]
10436	1070	1059.54	1823.91	0.783604	8.08e-43	*	4.42e-45	EMG1	GO:0005654//nucleoplasm;GO:0005730//nucleolus;GO:0032040//small-subunit processome;GO:0005737//cytoplasm	GO:0005515//protein binding;GO:0070037//rRNA (pseudouridine) methyltransferase activity;GO:0019843//rRNA binding	GO:0042274//ribosomal small subunit biogenesis;GO:0006364//rRNA processing	K14568//rRNA small subunit pseudouridine methyltransferase Nep1 [EC:2.1.1.260]	gi|987996606|ref|NP_001306978.1|//ribosomal RNA small subunit methyltransferase NEP1 isoform 2 [Homo sapiens];gi|194328699|ref|NP_006322.4|//ribosomal RNA small subunit methyltransferase NEP1 isoform 1 [Homo sapiens]
158401	4835	18.0643	31.0837	0.783022	0.0537613	*	0.016402	C9orf84	NA	NA	NA	NA	gi|578817104|ref|XP_006717037.1|//PREDICTED: uncharacterized protein C9orf84 isoform X2 [Homo sapiens];gi|565671740|ref|NP_001074020.2|//uncharacterized protein C9orf84 isoform 2 [Homo sapiens];gi|767956472|ref|XP_011516611.1|//PREDICTED: uncharacterized protein C9orf84 isoform X10 [Homo sapiens];gi|767956465|ref|XP_011516608.1|//PREDICTED: uncharacterized protein C9orf84 isoform X6 [Homo sapiens…
3889	1875	84.1182	144.636	0.781939	0.000514392	*	8.59e-05	KRT83	GO:0005615//extracellular space;GO:0045095//keratin filament	GO:0005515//protein binding;GO:0005198//structural molecule activity	GO:0008544//epidermis development	K07605//type II keratin, basic	gi|169790841|ref|NP_002273.3|//keratin, type II cuticular Hb3 [Homo sapiens]
133690	873	8.55778	14.6995	0.780459	0.118244	*	0.0414601	CAPSL	GO:0005737//cytoplasm	GO:0005509//calcium ion binding	NA	K16465//centrin-1;K02183//calmodulin	gi|578809845|ref|XP_006714507.1|//PREDICTED: calcyphosin-like protein isoform X1 [Homo sapiens];gi|578809847|ref|XP_006714508.1|//PREDICTED: calcyphosin-like protein isoform X2 [Homo sapiens]
112616	1319	19.3311	33.1848	0.779597	0.0443292	*	0.0131055	CMTM7	GO:0005615//extracellular space;GO:0016021//integral component of membrane	GO:0005125//cytokine activity	GO:0006935//chemotaxis	NA	gi|820984901|ref|XP_012354285.1|//PREDICTED: CKLF-like MARVEL transmembrane domain-containing protein 7 isoform X2 [Nomascus leucogenys];gi|19923929|ref|NP_612419.1|//CKLF-like MARVEL transmembrane domain-containing protein 7 isoform a [Homo sapiens];gi|31657099|ref|NP_852137.1|//CKLF-like MARVEL transmembrane domain-containing protein 7 isoform b [Homo sapiens];gi|767922216|ref|XP_011531621.1|//…
1030	3897	612.34	1049.41	0.777169	1.5e-27	*	1.59e-29	CDKN2B	GO:0005654//nucleoplasm;GO:0005829//cytosol	GO:0004861//cyclin-dependent protein serine/threonine kinase inhibitor activity;GO:0016301//kinase activity;GO:0019901//protein kinase binding	GO:0000080//mitotic G1 phase;GO:0014070//response to organic cyclic compound;GO:0030219//megakaryocyte differentiation;GO:0034097//response to cytokine;GO:0007050//cell cycle arrest;GO:0031670//cellular response to nutrient;GO:0042326//negative regulation of phosphorylation;GO:0007093//mitotic cell cycle checkpoint;GO:0045944//positive regulation of transcription from RNA polymerase II promoter;G…	K04685//cyclin-dependent kinase inhibitor 2B	gi|17981696|ref|NP_511042.1|//cyclin-dependent kinase 4 inhibitor B isoform 2 [Homo sapiens];gi|17981694|ref|NP_004927.2|//cyclin-dependent kinase 4 inhibitor B isoform 1 [Homo sapiens]
7052	3929	1057.55	1812.22	0.777037	2.45e-46	*	1.19e-48	TGM2	GO:0070062//extracellular vesicular exosome;GO:0005783//endoplasmic reticulum;GO:0031226//intrinsic component of plasma membrane;GO:0005925//focal adhesion;GO:0005829//cytosol;GO:0005739//mitochondrion	GO:0046872//metal ion binding;GO:0005515//protein binding;GO:0005524//ATP binding;GO:0005525//GTP binding;GO:0003810//protein-glutamine gamma-glutamyltransferase activity;GO:0003924//GTPase activity	GO:0060445//branching involved in salivary gland morphogenesis;GO:0051482//positive regulation of cytosolic calcium ion concentration involved in phospholipase C-activating G-protein coupled signaling pathway;GO:0045785//positive regulation of cell adhesion;GO:0050729//positive regulation of inflammatory response;GO:0051260//protein homooligomerization;GO:0043277//apoptotic cell clearance;GO:0001…	K05625//transglutaminase 2 [EC:2.3.2.13]	gi|39777599|ref|NP_945189.1|//protein-glutamine gamma-glutamyltransferase 2 isoform b [Homo sapiens];gi|194390580|dbj|BAG62049.1|//unnamed protein product [Homo sapiens];gi|756142510|pdb|4PYG|A//Chain A, Transglutaminase2 Complexed With Gtp;gi|194381290|dbj|BAG58599.1|//unnamed protein product [Homo sapiens]
2533	4539	8.21326	14.07	0.776594	0.123713	*	0.0437965	FYB	GO:0005634//nucleus;GO:0005829//cytosol;GO:0015629//actin cytoskeleton;GO:0030054//cell junction;GO:0005886//plasma membrane	GO:0005102//receptor binding;GO:0032403//protein complex binding	GO:0006607//NLS-bearing protein import into nucleus;GO:0050852//T cell receptor signaling pathway;GO:0006468//protein phosphorylation	K17698//FYN binding protein	gi|340545556|ref|NP_001230022.1|//FYN-binding protein isoform 3 [Homo sapiens] ;gi|767934356|ref|XP_011512313.1|//PREDICTED: FYN-binding protein isoform X3 [Homo sapiens];gi|767934360|ref|XP_011512315.1|//PREDICTED: FYN-binding protein isoform X5 [Homo sapiens]
7280	1623	415.937	711.444	0.774384	6.4e-21	*	1.23e-22	TUBB2A	GO:0070062//extracellular vesicular exosome;GO:0005634//nucleus;GO:0005874//microtubule;GO:0005737//cytoplasm	GO:0005515//protein binding;GO:0005200//structural constituent of cytoskeleton;GO:0005525//GTP binding;GO:0003924//GTPase activity	GO:0051258//protein polymerization;GO:0001764//neuron migration;GO:0051084//'de novo' posttranslational protein folding;GO:0007017//microtubule-based process	K07375//tubulin beta	gi|4507729|ref|NP_001060.1|//tubulin beta-2A chain isoform 1 [Homo sapiens];gi|874507470|ref|NP_001297244.1|//tubulin beta-2A chain isoform 2 [Homo sapiens]
56165	4510	2.82291	4.82287	0.772709	0.164673	*	0.0624136	TDRD1	GO:0033391//chromatoid body;GO:0071546//pi-body	GO:0046872//metal ion binding;GO:0005515//protein binding	GO:0007281//germ cell development;GO:0007275//multicellular organismal development;GO:0043046//DNA methylation involved in gamete generation;GO:0031047//gene silencing by RNA;GO:0007283//spermatogenesis;GO:0034587//piRNA metabolic process	K18405//tudor domain-containing protein 1/4/6/7	gi|767963296|ref|XP_011538266.1|//PREDICTED: tudor domain-containing protein 1 isoform X3 [Homo sapiens];gi|767963299|ref|XP_011538267.1|//PREDICTED: tudor domain-containing protein 1 isoform X5 [Homo sapiens];gi|530393998|ref|XP_005270036.1|//PREDICTED: tudor domain-containing protein 1 isoform X4 [Homo sapiens];gi|38505161|ref|NP_942090.1|//tudor domain-containing protein 1 [Homo sapiens];gi|76…
3219	2711	4.90497	8.36712	0.770488	0.165907	*	0.0630726	HOXB9	GO:0005654//nucleoplasm;GO:0005739//mitochondrion	GO:0005515//protein binding;GO:0043565//sequence-specific DNA binding	GO:0009952//anterior/posterior pattern specification;GO:0060070//canonical Wnt signaling pathway;GO:0045944//positive regulation of transcription from RNA polymerase II promoter;GO:0060326//cell chemotaxis;GO:0048706//embryonic skeletal system development;GO:0030879//mammary gland development	K09294//homeobox protein HoxA/B/C/D9	gi|15029508|ref|NP_076922.1|//homeobox protein Hox-B9 [Homo sapiens]
64129	2107	84.8088	144.506	0.768842	2.85e-05	*	3.59e-06	TINAGL1	GO:0031012//extracellular matrix;GO:0070062//extracellular vesicular exosome;GO:0005615//extracellular space;GO:0005764//lysosome	GO:0005201//extracellular matrix structural constituent;GO:0005044//scavenger receptor activity;GO:0004197//cysteine-type endopeptidase activity;GO:0030247//polysaccharide binding;GO:0043236//laminin binding	GO:0016197//endosomal transport;GO:0006508//proteolysis;GO:0006955//immune response	K01363//cathepsin B [EC:3.4.22.1]	gi|11545918|ref|NP_071447.1|//tubulointerstitial nephritis antigen-like isoform 1 precursor [Homo sapiens];gi|324711034|ref|NP_001191343.1|//tubulointerstitial nephritis antigen-like isoform 2 precursor [Homo sapiens] ;gi|324713036|ref|NP_001191344.1|//tubulointerstitial nephritis antigen-like isoform 3 [Homo sapiens];gi|530363130|ref|XP_005271163.1|//PREDICTED: tubulointerstitial nephritis antig…
27129	2908	162.933	277.591	0.768685	2.04e-08	*	1.53e-09	HSPB7	GO:0016235//aggresome;GO:0015629//actin cytoskeleton;GO:0005739//mitochondrion;GO:0015030//Cajal body	GO:0008022//protein C-terminus binding;GO:0031005//filamin binding	GO:0006986//response to unfolded protein;GO:0008016//regulation of heart contraction	K09546//heat shock protein beta-7	gi|7657202|ref|NP_055239.1|//heat shock protein beta-7 [Homo sapiens];gi|694883564|ref|XP_009447270.1|//PREDICTED: heat shock protein beta-7 isoform X1 [Pan troglodytes];gi|694883566|ref|XP_009447280.1|//PREDICTED: heat shock protein beta-7 isoform X2 [Pan troglodytes]
79816	2025	66.7851	113.775	0.768585	0.000630378	*	0.000107427	TLE6	GO:0005634//nucleus;GO:0005938//cell cortex;GO:0043234//protein complex	NA	GO:0006355//regulation of transcription, DNA-templated	K04497//groucho	gi|221136834|ref|NP_001137458.1|//transducin-like enhancer protein 6 isoform 1 [Homo sapiens];gi|768004101|ref|XP_011526607.1|//PREDICTED: transducin-like enhancer protein 6 isoform X3 [Homo sapiens]
107985428	3441	7.87212	13.4008	0.767499	0.134548	*	0.0485478	LOC107985428	NA	NA	NA	NA	NA
9002	2731	112.1	190.623	0.765931	2.12e-06	*	2.16e-07	F2RL3	GO:0005887//integral component of plasma membrane;GO:0005576//extracellular region	GO:0015057//thrombin receptor activity	GO:0007200//phospholipase C-activating G-protein coupled receptor signaling pathway;GO:0030168//platelet activation;GO:0051281//positive regulation of release of sequestered calcium ion into cytosol;GO:0060155//platelet dense granule organization	K04236//coagulation factor II (thrombin) receptor-like 3	gi|89353783|ref|NP_003941.2|//proteinase-activated receptor 4 precursor [Homo sapiens]
144453	1924	6.28075	10.679	0.765772	0.159114	*	0.0594469	BEST3	GO:0005887//integral component of plasma membrane;GO:0034707//chloride channel complex	GO:0005254//chloride channel activity	GO:0043271//negative regulation of ion transport	K13880//bestrophin-3	gi|115527104|ref|NP_116124.2|//bestrophin-3 isoform 1 [Homo sapiens];gi|543583705|ref|NP_001269542.1|//bestrophin-3 isoform 3 [Homo sapiens] ;gi|578823355|ref|XP_006719319.1|//PREDICTED: bestrophin-3 isoform X4 [Homo sapiens];gi|543583703|ref|NP_001269545.1|//bestrophin-3 isoform 5 [Homo sapiens];gi|694951172|ref|XP_009424101.1|//PREDICTED: bestrophin-3 isoform X8 [Pan troglodytes];gi|543583721|r…
83882	1760	47.9011	81.4298	0.765499	0.00205898	*	0.000399178	TSPAN10	GO:0005887//integral component of plasma membrane	GO:0019899//enzyme binding	NA	K17351//tetraspanin-10	gi|589269125|ref|NP_001277141.1|//tetraspanin-10 isoform a [Homo sapiens]
8639	3115	20.8167	35.3424	0.763658	0.0336868	*	0.00948736	AOC3	GO:0005783//endoplasmic reticulum;GO:0009986//cell surface;GO:0005794//Golgi apparatus;GO:0016021//integral component of membrane;GO:0005769//early endosome;GO:0005886//plasma membrane;GO:0005902//microvillus	GO:0046982//protein heterodimerization activity;GO:0052595//aliphatic-amine oxidase activity;GO:0042803//protein homodimerization activity;GO:0052593//tryptamine:oxygen oxidoreductase (deaminating) activity;GO:0052594//aminoacetone:oxygen oxidoreductase(deaminating) activity;GO:0008131//primary amine oxidase activity;GO:0005509//calcium ion binding;GO:0005507//copper ion binding;GO:0052596//phene…	GO:0046677//response to antibiotic;GO:0007155//cell adhesion;GO:0009308//amine metabolic process;GO:0006954//inflammatory response	K00276//primary-amine oxidase [EC:1.4.3.21]	gi|480306392|ref|NP_001264661.1|//membrane primary amine oxidase isoform 3 [Homo sapiens];gi|767996324|ref|XP_011523721.1|//PREDICTED: membrane primary amine oxidase isoform X1 [Homo sapiens];gi|4502119|ref|NP_003725.1|//membrane primary amine oxidase isoform 1 [Homo sapiens];gi|480306390|ref|NP_001264660.1|//membrane primary amine oxidase isoform 2 [Homo sapiens];gi|767996326|ref|XP_011523722.1|…
92691	3575	4.31143	7.2989	0.759512	0.178241	*	0.0689426	TMEM169	GO:0016021//integral component of membrane	NA	NA	NA	gi|19923913|ref|NP_612399.1|//transmembrane protein 169 [Homo sapiens]
55287	2116	4.94121	8.36064	0.75875	0.175883	*	0.0677066	TMEM40	GO:0016021//integral component of membrane	NA	NA	NA	gi|548923860|ref|NP_001271337.1|//transmembrane protein 40 isoform d [Homo sapiens];gi|548923729|ref|NP_001271336.1|//transmembrane protein 40 isoform c [Homo sapiens];gi|548923663|ref|NP_001271335.1|//transmembrane protein 40 isoform a [Homo sapiens]
375607	2896	5.92977	10.0227	0.75723	0.168247	*	0.0642353	NAT16	GO:0031417//NatC complex	GO:0004596//peptide alpha-N-acetyltransferase activity	NA	K14456//2-acylglycerol O-acyltransferase 3 [EC:2.3.1.20 2.3.1.22]	gi|284005402|ref|NP_940973.2|//probable N-acetyltransferase 16 [Homo sapiens]
80115	1582	96.0745	162.104	0.754693	1.31e-05	*	1.55e-06	BAIAP2L2	GO:0005829//cytosol;GO:0015629//actin cytoskeleton;GO:0044291//cell-cell contact zone;GO:0005886//plasma membrane;GO:0071439//clathrin complex;GO:0030659//cytoplasmic vesicle membrane	GO:0008093//cytoskeletal adaptor activity;GO:0005543//phospholipid binding	GO:0007165//signal transduction;GO:0046847//filopodium assembly	K20127//null	gi|768025808|ref|XP_011528688.1|//PREDICTED: brain-specific angiogenesis inhibitor 1-associated protein 2-like protein 2 isoform X7 [Homo sapiens];gi|113205091|ref|NP_079321.3|//brain-specific angiogenesis inhibitor 1-associated protein 2-like protein 2 [Homo sapiens];gi|768025790|ref|XP_011528682.1|//PREDICTED: brain-specific angiogenesis inhibitor 1-associated protein 2-like protein 2 isoform X…
8340	453	1.48482	2.50025	0.751785	0.12546	*	0.0445044	HIST1H2BL	GO:0070062//extracellular vesicular exosome;GO:0005654//nucleoplasm;GO:0005737//cytoplasm;GO:0000788//nuclear nucleosome	GO:0003677//DNA binding;GO:0046982//protein heterodimerization activity	GO:0006334//nucleosome assembly	K11252//histone H2B	gi|4504259|ref|NP_003510.1|//histone H2B type 1-L [Homo sapiens]
478	3504	24.555	41.2714	0.749126	0.0309239	*	0.00857517	ATP1A3	GO:0030424//axon;GO:0005634//nucleus;GO:0005783//endoplasmic reticulum;GO:0043209//myelin sheath;GO:1903561//extracellular vesicle;GO:0044327//dendritic spine head;GO:0005890//sodium:potassium-exchanging ATPase complex;GO:0005794//Golgi apparatus;GO:0044326//dendritic spine neck;GO:0042383//sarcolemma	GO:0043395//heparan sulfate proteoglycan binding;GO:0046872//metal ion binding;GO:0005524//ATP binding;GO:0086037//sodium:potassium-exchanging ATPase activity involved in regulation of cardiac muscle cell membrane potential;GO:0031748//D1 dopamine receptor binding;GO:0051087//chaperone binding;GO:1990239//steroid hormone binding	GO:0008542//visual learning;GO:0042493//response to drug;GO:0034220//ion transmembrane transport;GO:0008344//adult locomotory behavior;GO:0006754//ATP biosynthetic process;GO:0035235//ionotropic glutamate receptor signaling pathway;GO:0007613//memory;GO:0015672//monovalent inorganic cation transport	K01539//sodium/potassium-transporting ATPase subunit alpha [EC:3.6.3.9]	gi|22748667|ref|NP_689509.1|//sodium/potassium-transporting ATPase subunit alpha-3 isoform 1 [Homo sapiens];gi|371940938|ref|NP_001243142.1|//sodium/potassium-transporting ATPase subunit alpha-3 isoform 2 [Homo sapiens];gi|371940940|ref|NP_001243143.1|//sodium/potassium-transporting ATPase subunit alpha-3 isoform 3 [Homo sapiens]
4128	5330	222.548	374.049	0.749109	1.55e-09	*	9.7e-11	MAOA	GO:0016021//integral component of membrane;GO:0005741//mitochondrial outer membrane	GO:0051378//serotonin binding;GO:0008131//primary amine oxidase activity;GO:0050660//flavin adenine dinucleotide binding	GO:0007610//behavior;GO:0007269//neurotransmitter secretion;GO:0042136//neurotransmitter biosynthetic process;GO:0042135//neurotransmitter catabolic process;GO:0006805//xenobiotic metabolic process;GO:0006576//cellular biogenic amine metabolic process;GO:0042420//dopamine catabolic process	K00274//monoamine oxidase [EC:1.4.3.4]	gi|4557735|ref|NP_000231.1|//amine oxidase [flavin-containing] A isoform 1 [Homo sapiens]
3594	2026	24.9439	41.8703	0.747243	0.0328636	*	0.00920754	IL12RB1	GO:0009897//external side of plasma membrane;GO:0042022//interleukin-12 receptor complex;GO:0072536//interleukin-23 receptor complex	GO:0042020//interleukin-23 receptor activity;GO:0016517//interleukin-12 receptor activity;GO:0042019//interleukin-23 binding;GO:0005143//interleukin-12 receptor binding	GO:0038155//interleukin-23-mediated signaling pathway;GO:2000318//positive regulation of T-helper 17 type immune response;GO:2000330//positive regulation of T-helper 17 cell lineage commitment;GO:0071346//cellular response to interferon-gamma;GO:0043382//positive regulation of memory T cell differentiation;GO:0001916//positive regulation of T cell mediated cytotoxicity;GO:0002827//positive regula…	K05063//interleukin 12 receptor beta-1	gi|768002224|ref|XP_011526273.1|//PREDICTED: interleukin-12 receptor subunit beta-1 isoform X7 [Homo sapiens];gi|586946418|ref|NP_001276953.1|//interleukin-12 receptor subunit beta-1 isoform 4 [Homo sapiens];gi|768002212|ref|XP_011526271.1|//PREDICTED: interleukin-12 receptor subunit beta-1 isoform X4 [Homo sapiens];gi|768002228|ref|XP_011526274.1|//PREDICTED: interleukin-12 receptor subunit beta…
8988	787	4.84346	8.12583	0.746475	0.183354	*	0.0713776	HSPB3	GO:0005634//nucleus;GO:0005737//cytoplasm	NA	GO:0006986//response to unfolded protein;GO:0008219//cell death	K09544//heat shock protein beta-3	gi|5453688|ref|NP_006299.1|//heat shock protein beta-3 [Homo sapiens]
63924	1101	79.4389	133.175	0.74541	0.000131441	*	1.92e-05	CIDEC	GO:0005634//nucleus;GO:0005783//endoplasmic reticulum;GO:0005811//lipid particle;GO:0005829//cytosol	NA	GO:0006355//regulation of transcription, DNA-templated	K02310//DNA fragmentation factor, 45 kD, alpha subunit	gi|313850983|ref|NP_001186552.1|//cell death activator CIDE-3 isoform 1 [Homo sapiens] ;gi|313851088|ref|NP_001186480.1|//cell death activator CIDE-3 isoform 2 [Homo sapiens]
84628	3150	8.95491	14.9915	0.743398	0.148426	*	0.0545282	NTNG2	GO:0030424//axon;GO:0046658//anchored component of plasma membrane	GO:0005515//protein binding	GO:0007409//axonogenesis	K16359//netrin-G2	gi|767958506|ref|XP_011517412.1|//PREDICTED: netrin-G2 isoform X7 [Homo sapiens];gi|767958510|ref|XP_011517414.1|//PREDICTED: netrin-G2 isoform X9 [Homo sapiens];gi|578817944|ref|XP_006717367.1|//PREDICTED: netrin-G2 isoform X4 [Homo sapiens];gi|817286163|ref|XP_012313353.1|//PREDICTED: netrin-G2 isoform X1 [Aotus nancymaae];gi|767958512|ref|XP_011517415.1|//PREDICTED: netrin-G2 isoform X10 [Homo…
1608	5701	9.47369	15.7958	0.737544	0.134455	*	0.0484896	DGKG	GO:0005737//cytoplasm;GO:0005886//plasma membrane	GO:0004143//diacylglycerol kinase activity;GO:0005524//ATP binding;GO:0005509//calcium ion binding	GO:0007205//protein kinase C-activating G-protein coupled receptor signaling pathway;GO:0030168//platelet activation;GO:0035556//intracellular signal transduction;GO:0048666//neuron development	K00901//diacylglycerol kinase (ATP) [EC:2.7.1.107]	gi|124256474|ref|NP_001074213.1|//diacylglycerol kinase gamma isoform 2 [Homo sapiens];gi|124256476|ref|NP_001337.2|//diacylglycerol kinase gamma isoform 1 [Homo sapiens];gi|124256482|ref|NP_001074214.1|//diacylglycerol kinase gamma isoform 3 [Homo sapiens]
200407	2252	7.4828	12.4665	0.736402	0.161313	*	0.0606706	CREG2	GO:0005783//endoplasmic reticulum;GO:0005794//Golgi apparatus;GO:0005576//extracellular region	GO:0010181//FMN binding;GO:0016491//oxidoreductase activity	NA	K15704//E3 ubiquitin-protein ligase RNF149 [EC:2.3.2.27]	gi|24475869|ref|NP_722578.1|//protein CREG2 precursor [Homo sapiens];gi|767917146|ref|XP_011509079.1|//PREDICTED: protein CREG2 isoform X1 [Homo sapiens]
83442	1131	1779.06	2960.78	0.734864	7.12e-49	*	3.08e-51	SH3BGRL3	GO:0070062//extracellular vesicular exosome;GO:0005634//nucleus;GO:0005737//cytoplasm;GO:0030027//lamellipodium	GO:0009055//electron carrier activity;GO:0015035//protein disulfide oxidoreductase activity;GO:0030215//semaphorin receptor binding;GO:0005096//GTPase activator activity	GO:0045454//cell redox homeostasis	K16342//cytosolic phospholipase A2 [EC:3.1.1.4];K13912//deleted in malignant brain tumors 1 protein	gi|62737953|pdb|1SJ6|A//Chain A, Nmr Structure And Regulated Expression In Apl Cell Of Human Sh3bgrl3
93349	2405	110.874	184.385	0.733803	1.14e-05	*	1.33e-06	SP140L	GO:0005634//nucleus	GO:0003677//DNA binding;GO:0008270//zinc ion binding	NA	K15413//nuclear autoantigen Sp-100	gi|578805201|ref|XP_006712918.1|//PREDICTED: nuclear body protein SP140-like protein isoform X7 [Homo sapiens];gi|578805203|ref|XP_006712919.1|//PREDICTED: nuclear body protein SP140-like protein isoform X8 [Homo sapiens];gi|767920636|ref|XP_011510488.1|//PREDICTED: nuclear body protein SP140-like protein isoform X2 [Homo sapiens];gi|767920651|ref|XP_011510493.1|//PREDICTED: nuclear body protein …
379	1602	466.28	775.235	0.733436	3.48e-19	*	7.59e-21	ARL4D	GO:0005730//nucleolus;GO:0005737//cytoplasm;GO:0005886//plasma membrane	GO:0005515//protein binding;GO:0005525//GTP binding;GO:0003924//GTPase activity	GO:0009306//protein secretion;GO:0007264//small GTPase mediated signal transduction	K07945//ADP-ribosylation factor-like protein 4	gi|41327767|ref|NP_001652.2|//ADP-ribosylation factor-like protein 4D [Homo sapiens]
2521	1850	4781.35	7942.4	0.732155	9.54e-66	*	2.89e-68	FUS	GO:0005654//nucleoplasm;GO:0005844//polysome;GO:0043204//perikaryon;GO:0044327//dendritic spine head;GO:0048471//perinuclear region of cytoplasm	GO:0003677//DNA binding;GO:0030331//estrogen receptor binding;GO:0046966//thyroid hormone receptor binding;GO:0042802//identical protein binding;GO:0046965//retinoid X receptor binding;GO:0003713//transcription coactivator activity;GO:0000166//nucleotide binding;GO:0035255//ionotropic glutamate receptor binding;GO:0008270//zinc ion binding;GO:0031489//myosin V binding	GO:0000398//mRNA splicing, via spliceosome;GO:0008219//cell death	K13098//RNA-binding protein FUS	gi|283135173|ref|NP_001164408.1|//RNA-binding protein FUS isoform 3 [Homo sapiens];gi|4826734|ref|NP_004951.1|//RNA-binding protein FUS isoform 1 [Homo sapiens];gi|283135201|ref|NP_001164105.1|//RNA-binding protein FUS isoform 2 [Homo sapiens];gi|119572537|gb|EAW52152.1|//fusion (involved in t(12;16) in malignant liposarcoma), isoform CRA_c [Homo sapiens];gi|767988385|ref|XP_011544083.1|//PREDICT…
57099	1303	209.011	347.047	0.731557	5.43e-10	*	3.18e-11	AVEN	GO:0012505//endomembrane system;GO:0016020//membrane;GO:0005622//intracellular	GO:0005515//protein binding	GO:0043066//negative regulation of apoptotic process	NA	gi|767984794|ref|XP_011520121.1|//PREDICTED: cell death regulator Aven isoform X2 [Homo sapiens];gi|767984797|ref|XP_011520122.1|//PREDICTED: cell death regulator Aven isoform X4 [Homo sapiens];gi|767984792|ref|XP_011520120.1|//PREDICTED: cell death regulator Aven isoform X1 [Homo sapiens];gi|9966841|ref|NP_065104.1|//cell death regulator Aven [Homo sapiens]
65094	2574	141.065	234.16	0.73113	7.15e-07	*	6.8e-08	JMJD4	NA	GO:0005515//protein binding	NA	K17500//integrin-linked kinase-associated serine/threonine phosphatase 2C [EC:3.1.3.16];K11323//histone arginine demethylase JMJD6 [EC:1.14.11.-]	gi|239788847|ref|NP_075383.2|//jmjC domain-containing protein 4 isoform 1 [Homo sapiens];gi|767912617|ref|XP_011542564.1|//PREDICTED: jmjC domain-containing protein 4 isoform X1 [Homo sapiens];gi|239788849|ref|NP_001154937.1|//jmjC domain-containing protein 4 isoform 2 [Homo sapiens]
5168	3080	12.1191	20.1067	0.730402	0.108838	*	0.0376839	ENPP2	GO:0005615//extracellular space;GO:0005887//integral component of plasma membrane;GO:0016021//integral component of membrane	GO:0004551//nucleotide diphosphatase activity;GO:0030247//polysaccharide binding;GO:0003676//nucleic acid binding;GO:0004622//lysophospholipase activity;GO:0005044//scavenger receptor activity;GO:0004528//phosphodiesterase I activity;GO:0047391//alkylglycerophosphoethanolamine phosphodiesterase activity;GO:0005509//calcium ion binding;GO:0008270//zinc ion binding;GO:0008134//transcription factor …	GO:0007186//G-protein coupled receptor signaling pathway;GO:0030334//regulation of cell migration;GO:0034638//phosphatidylcholine catabolic process;GO:0006955//immune response;GO:0006935//chemotaxis	K01122//ectonucleotide pyrophosphatase/phosphodiesterase family member 2 [EC:3.1.4.39]	gi|195947389|ref|NP_001124335.1|//ectonucleotide pyrophosphatase/phosphodiesterase family member 2 isoform 3 preproprotein [Homo sapiens];gi|91823274|ref|NP_006200.3|//ectonucleotide pyrophosphatase/phosphodiesterase family member 2 isoform 1 preproprotein [Homo sapiens];gi|578816043|ref|XP_006716650.1|//PREDICTED: ectonucleotide pyrophosphatase/phosphodiesterase family member 2 isoform X4 [Homo …
5915	2680	1.50029	2.4868	0.729042	0.136514	*	0.0493981	RARB	GO:0005654//nucleoplasm;GO:0005737//cytoplasm	GO:0003707//steroid hormone receptor activity;GO:0046965//retinoid X receptor binding;GO:0003708//retinoic acid receptor activity;GO:0000977//RNA polymerase II regulatory region sequence-specific DNA binding;GO:0008144//drug binding;GO:0008270//zinc ion binding;GO:0032403//protein complex binding	GO:0055012//ventricular cardiac muscle cell differentiation;GO:0000122//negative regulation of transcription from RNA polymerase II promoter;GO:0022008//neurogenesis;GO:0043065//positive regulation of apoptotic process;GO:0008285//negative regulation of cell proliferation;GO:0007165//signal transduction;GO:0035116//embryonic hindlimb morphogenesis;GO:0035264//multicellular organism growth;GO:0032…	K08528//retinoic acid receptor beta	gi|590122042|ref|NP_001277206.1|//retinoic acid receptor beta isoform 5 [Homo sapiens] ;gi|590122023|ref|NP_001277195.1|//retinoic acid receptor beta isoform 4 [Homo sapiens];gi|14916494|ref|NP_000956.2|//retinoic acid receptor beta isoform 1 [Homo sapiens];gi|544410961|ref|XP_005545687.1|//PREDICTED: retinoic acid receptor beta isoform X3 [Macaca fascicularis];gi|590122016|ref|NP_001277145.1|//r…
619189	2494	6.5148	10.7766	0.726116	0.184117	*	0.071785	SERINC4	GO:0016021//integral component of membrane	GO:0015194//L-serine transmembrane transporter activity	GO:0008654//phospholipid biosynthetic process	NA	gi|384475532|ref|NP_001244961.1|//serine incorporator 4 isoform 3 [Homo sapiens];gi|384475530|ref|NP_001244960.1|//serine incorporator 4 isoform 1 [Homo sapiens]
1844	1711	959.453	1584.81	0.72403	7.76e-34	*	6.08e-36	DUSP2	GO:0005634//nucleus	GO:0008330//protein tyrosine/threonine phosphatase activity;GO:0017017//MAP kinase tyrosine/serine/threonine phosphatase activity;GO:0051019//mitogen-activated protein kinase binding;GO:0004725//protein tyrosine phosphatase activity	GO:0035335//peptidyl-tyrosine dephosphorylation;GO:0001706//endoderm formation;GO:0000188//inactivation of MAPK activity;GO:0042981//regulation of apoptotic process	K04459//dual specificity MAP kinase phosphatase [EC:3.1.3.16 3.1.3.48]	gi|4758206|ref|NP_004409.1|//dual specificity protein phosphatase 2 [Homo sapiens]
11199	1447	33.0975	54.6547	0.723625	0.0144639	*	0.00357148	ANXA10	GO:0005739//mitochondrion	GO:0005544//calcium-dependent phospholipid binding;GO:0005515//protein binding;GO:0005509//calcium ion binding	NA	K17097//annexin A10	gi|767930975|ref|XP_011529873.1|//PREDICTED: annexin A10 isoform X1 [Homo sapiens];gi|48762937|ref|NP_009124.2|//annexin A10 [Homo sapiens]
241	898	2.75711	4.54967	0.722602	0.201854	*	0.0805228	ALOX5AP	GO:0031965//nuclear membrane;GO:0005829//cytosol;GO:0016021//integral component of membrane;GO:0005789//endoplasmic reticulum membrane	GO:0004364//glutathione transferase activity;GO:0004464//leukotriene-C4 synthase activity;GO:0047485//protein N-terminus binding;GO:0004602//glutathione peroxidase activity;GO:0046982//protein heterodimerization activity;GO:0042803//protein homodimerization activity;GO:0050544//arachidonic acid binding;GO:0004051//arachidonate 5-lipoxygenase activity;GO:0019899//enzyme binding;GO:0008047//enzyme …	GO:0002540//leukotriene production involved in inflammatory response;GO:0002675//positive regulation of acute inflammatory response;GO:0071277//cellular response to calcium ion;GO:0019370//leukotriene biosynthetic process;GO:0006750//glutathione biosynthetic process;GO:0070207//protein homotrimerization	K20735//null	gi|15718675|ref|NP_001620.2|//arachidonate 5-lipoxygenase-activating protein isoform 1 [Homo sapiens];gi|767977533|ref|XP_011533327.1|//PREDICTED: arachidonate 5-lipoxygenase-activating protein isoform X2 [Homo sapiens];gi|324711029|ref|NP_001191335.1|//arachidonate 5-lipoxygenase-activating protein isoform 2 [Homo sapiens]
90993	2734	2188.78	3611.76	0.722578	5.1e-48	*	2.3e-50	CREB3L1	GO:0005634//nucleus;GO:0016021//integral component of membrane;GO:0005789//endoplasmic reticulum membrane	GO:0005515//protein binding;GO:0003682//chromatin binding;GO:0035497//cAMP response element binding;GO:0043565//sequence-specific DNA binding;GO:0001077//RNA polymerase II core promoter proximal region sequence-specific DNA binding transcription factor activity involved in positive regulation of transcription	GO:0006986//response to unfolded protein;GO:0030500//regulation of bone mineralization	K09048//cyclic AMP-responsive element-binding protein 3	gi|16418355|ref|NP_443086.1|//cyclic AMP-responsive element-binding protein 3-like protein 1 [Homo sapiens];gi|578820944|ref|XP_006718443.1|//PREDICTED: cyclic AMP-responsive element-binding protein 3-like protein 1 isoform X1 [Homo sapiens]
7538	1752	118.268	194.613	0.718547	1.89e-05	*	2.3e-06	ZFP36	GO:0010494//cytoplasmic stress granule;GO:0005634//nucleus;GO:0005829//cytosol	GO:0003677//DNA binding;GO:0046872//metal ion binding;GO:0071889//14-3-3 protein binding;GO:0035925//mRNA 3'-UTR AU-rich region binding;GO:0019957//C-C chemokine binding;GO:0003727//single-stranded RNA binding;GO:0019901//protein kinase binding	GO:0050779//RNA destabilization;GO:0070935//3'-UTR-mediated mRNA stabilization;GO:0032680//regulation of tumor necrosis factor production;GO:0045638//negative regulation of myeloid cell differentiation;GO:0050728//negative regulation of inflammatory response;GO:1900153//positive regulation of nuclear-transcribed mRNA catabolic process, deadenylation-dependent decay;GO:0000122//negative regulation…	K15308//tristetraprolin	gi|393539038|ref|NP_003398.2|//tristetraprolin [Homo sapiens]
1506	1197	17.4774	28.728	0.716967	0.0754482	*	0.0244789	CTRL	GO:0005615//extracellular space	GO:0004252//serine-type endopeptidase activity	GO:0006508//proteolysis;GO:0007586//digestion	K09632//chymotrypsin-like protease [EC:3.4.21.-]	gi|24981032|gb|AAH39716.1|//CTRL protein, partial [Homo sapiens]
196	6247	720.861	1184.74	0.716776	1.63e-27	*	1.75e-29	AHR	GO:0005654//nucleoplasm;GO:0005667//transcription factor complex;GO:0034753//nuclear aryl hydrocarbon receptor complex;GO:0034752//cytosolic aryl hydrocarbon receptor complex	GO:0051879//Hsp90 protein binding;GO:0070888//E-box binding;GO:0004874//aryl hydrocarbon receptor activity;GO:0035326//enhancer binding;GO:0046982//protein heterodimerization activity;GO:0004879//ligand-activated sequence-specific DNA binding RNA polymerase II transcription factor activity;GO:0008134//transcription factor binding	GO:0030888//regulation of B cell proliferation;GO:0045899//positive regulation of RNA polymerase II transcriptional preinitiation complex assembly;GO:0006805//xenobiotic metabolic process;GO:0006950//response to stress;GO:0001568//blood vessel development;GO:0006915//apoptotic process;GO:0030850//prostate gland development;GO:0000122//negative regulation of transcription from RNA polymerase II pr…	K09093//aryl hydrocarbon receptor	gi|4502003|ref|NP_001612.1|//aryl hydrocarbon receptor [Homo sapiens]
8995	748	1.12896	1.85402	0.715663	0.107545	*	0.0371405	TNFSF18	GO:0005615//extracellular space;GO:0009986//cell surface;GO:0016021//integral component of membrane;GO:0005886//plasma membrane	GO:0005125//cytokine activity;GO:0032813//tumor necrosis factor receptor superfamily binding	GO:0042129//regulation of T cell proliferation;GO:0051092//positive regulation of NF-kappaB transcription factor activity;GO:0007267//cell-cell signaling;GO:0002309//T cell proliferation involved in immune response;GO:0043066//negative regulation of apoptotic process;GO:0033209//tumor necrosis factor-mediated signaling pathway	K05479//tumor necrosis factor ligand superfamily member 18	gi|157419142|ref|NP_005083.2|//tumor necrosis factor ligand superfamily member 18 [Homo sapiens]
3604	6001	67.3885	110.439	0.712675	0.000646857	*	0.000110581	TNFRSF9	GO:0005615//extracellular space;GO:0005887//integral component of plasma membrane;GO:0009897//external side of plasma membrane	GO:0019955//cytokine binding;GO:0005031//tumor necrosis factor-activated receptor activity	GO:0008285//negative regulation of cell proliferation	K05146//tumor necrosis factor receptor superfamily member 9	gi|578799052|ref|XP_006710681.1|//PREDICTED: tumor necrosis factor receptor superfamily member 9 isoform X2 [Homo sapiens];gi|5730095|ref|NP_001552.2|//tumor necrosis factor receptor superfamily member 9 precursor [Homo sapiens]
340348	1989	51.7685	84.8005	0.711997	0.00378225	*	0.000787398	TSPAN33	GO:0009986//cell surface;GO:0005887//integral component of plasma membrane;GO:0097197//tetraspanin-enriched microdomain	GO:0019899//enzyme binding	NA	K17346//tetraspanin-33	gi|578814190|ref|XP_006716023.1|//PREDICTED: tetraspanin-33 isoform X1 [Homo sapiens];gi|30425534|ref|NP_848657.1|//tetraspanin-33 [Homo sapiens]
84803	2679	138.378	226.582	0.711419	1.53e-06	*	1.54e-07	GPAT3	GO:0016021//integral component of membrane;GO:0005789//endoplasmic reticulum membrane	GO:0004366//glycerol-3-phosphate O-acyltransferase activity;GO:0003841//1-acylglycerol-3-phosphate O-acyltransferase activity	GO:0032006//regulation of TOR signaling;GO:0016024//CDP-diacylglycerol biosynthetic process;GO:0019432//triglyceride biosynthetic process;GO:0006654//phosphatidic acid biosynthetic process;GO:0044281//small molecule metabolic process	K13506//glycerol-3-phosphate O-acyltransferase 3/4 [EC:2.3.1.15]	gi|21362092|ref|NP_116106.2|//glycerol-3-phosphate acyltransferase 3 [Homo sapiens];gi|635043457|ref|XP_007997305.1|//PREDICTED: glycerol-3-phosphate acyltransferase 3 isoform X1 [Chlorocebus sabaeus]
79999	1789	3.39294	5.55531	0.711331	0.208029	*	0.0836226	LOC79999	NA	NA	NA	NA	gi|767993009|ref|XP_011522428.1|//PREDICTED: uncharacterized protein ENSP00000382042-like [Homo sapiens];gi|632794810|ref|NP_001278834.1|//uncharacterized protein ENSP00000382042 [Homo sapiens]
107986873	488	8.69758	14.237	0.710964	0.185602	*	0.0726383	LOC107986873	NA	NA	NA	NA	gi|694927900|ref|XP_009454030.1|//PREDICTED: forkhead box protein L2-like isoform X2 [Pan troglodytes]
1358	1342	1.76227	2.8845	0.710889	0.174113	*	0.0668806	CPA2	GO:0005615//extracellular space;GO:0005773//vacuole	GO:0004181//metallocarboxypeptidase activity;GO:0008270//zinc ion binding	GO:0006508//proteolysis;GO:0007039//protein catabolic process in the vacuole	K01298//carboxypeptidase A2 [EC:3.4.17.15]	gi|217416390|ref|NP_001860.2|//carboxypeptidase A2 precursor [Homo sapiens]
113675	1358	139.3	227.933	0.710415	8.78e-07	*	8.51e-08	SDSL	GO:0070062//extracellular vesicular exosome;GO:0005739//mitochondrion	GO:0003941//L-serine ammonia-lyase activity;GO:0004794//L-threonine ammonia-lyase activity;GO:0030170//pyridoxal phosphate binding	GO:0006520//cellular amino acid metabolic process	K17989//L-serine/L-threonine ammonia-lyase [EC:4.3.1.17 4.3.1.19]	gi|19923959|ref|NP_612441.1|//serine dehydratase-like [Homo sapiens]
128497	752	6.18682	10.1168	0.709479	0.203664	*	0.0814364	SPATA25	GO:0016021//integral component of membrane	NA	GO:0030154//cell differentiation;GO:0007283//spermatogenesis	NA	gi|18129630|ref|NP_542175.1|//spermatogenesis-associated protein 25 [Homo sapiens]
646962	971	91.4137	149.202	0.706784	0.000124091	*	1.8e-05	HRCT1	GO:0016021//integral component of membrane	NA	NA	NA	gi|89886261|ref|NP_001034881.1|//histidine-rich carboxyl terminus protein 1 [Homo sapiens]
1815	1378	4.55473	7.42318	0.704673	0.222336	*	0.0912131	DRD4	GO:0012506//vesicle membrane;GO:0005887//integral component of plasma membrane;GO:0005938//cell cortex;GO:0043197//dendritic spine;GO:0043195//terminal bouton;GO:0043025//neuronal cell body	GO:0001588//dopamine neurotransmitter receptor activity, coupled via Gs;GO:0015459//potassium channel regulator activity;GO:0008144//drug binding;GO:0042802//identical protein binding;GO:0035240//dopamine binding;GO:0017124//SH3 domain binding;GO:0001591//dopamine neurotransmitter receptor activity, coupled via Gi/Go	GO:0050709//negative regulation of protein secretion;GO:0008344//adult locomotory behavior;GO:0007195//adenylate cyclase-inhibiting dopamine receptor signaling pathway;GO:0042053//regulation of dopamine metabolic process;GO:0050482//arachidonic acid secretion;GO:0007194//negative regulation of adenylate cyclase activity;GO:0046928//regulation of neurotransmitter secretion;GO:0006874//cellular cal…	K04147//dopamine receptor D4	gi|32483397|ref|NP_000788.2|//D(4) dopamine receptor [Homo sapiens]
23762	3539	552.477	899.134	0.702623	5.45e-21	*	1.04e-22	OSBP2	GO:0016020//membrane;GO:0097440//apical dendrite	GO:0005515//protein binding;GO:0015485//cholesterol binding	GO:0006869//lipid transport	K20462//null	gi|119580321|gb|EAW59917.1|//oxysterol binding protein 2, isoform CRA_b [Homo sapiens];gi|768024274|ref|XP_006724266.2|//PREDICTED: oxysterol-binding protein 2 isoform X4 [Homo sapiens];gi|768024263|ref|XP_011528359.1|//PREDICTED: oxysterol-binding protein 2 isoform X1 [Homo sapiens];gi|544346313|ref|NP_001269668.1|//oxysterol-binding protein 2 isoform d [Homo sapiens];gi|768024276|ref|XP_0115283…
102723872	1761	49.8152	80.8284	0.698277	0.00613874	*	0.00135182	LOC102723872	NA	NA	NA	NA	gi|767887085|ref|XP_011547398.1|//PREDICTED: putative protein FAM157B isoform X1, partial [Homo sapiens]
347688	1504	1.77018	2.87213	0.698224	0.181301	*	0.0703765	TUBB8	GO:0070062//extracellular vesicular exosome;GO:0005874//microtubule;GO:0005737//cytoplasm	GO:0005200//structural constituent of cytoskeleton;GO:0005525//GTP binding;GO:0003924//GTPase activity	GO:0051258//protein polymerization;GO:0007017//microtubule-based process	K07375//tubulin beta	gi|767960021|ref|XP_011517762.1|//PREDICTED: tubulin beta-8 chain isoform X2 [Homo sapiens];gi|42558279|ref|NP_817124.1|//tubulin beta-8 chain [Homo sapiens];gi|73487292|gb|AAI01271.1|//TUBB8 protein [Homo sapiens]
63934	4321	8.74135	14.1767	0.69759	0.175958	*	0.0677462	ZNF667	GO:0005634//nucleus	GO:0003677//DNA binding;GO:0046872//metal ion binding;GO:0003712//transcription cofactor activity	GO:0006355//regulation of transcription, DNA-templated	K09228//KRAB domain-containing zinc finger protein	gi|768010488|ref|XP_011525513.1|//PREDICTED: zinc finger protein 667 isoform X2 [Homo sapiens];gi|268607677|ref|NP_071386.3|//zinc finger protein 667 [Homo sapiens]
51237	845	2.78988	4.51838	0.695605	0.221843	*	0.0909448	MZB1	GO:0005788//endoplasmic reticulum lumen;GO:0034663//endoplasmic reticulum chaperone complex;GO:0005576//extracellular region	GO:0005515//protein binding	GO:0030888//regulation of B cell proliferation;GO:0002642//positive regulation of immunoglobulin biosynthetic process;GO:2001274//negative regulation of glucose import in response to insulin stimulus;GO:0033622//integrin activation;GO:0006915//apoptotic process;GO:0008284//positive regulation of cell proliferation	K14611//solute carrier family 23 (nucleobase transporter), member 1/2;K15410//elongation factor 1-delta	gi|117938314|ref|NP_057543.2|//marginal zone B- and B1-cell-specific protein precursor [Homo sapiens]
948	3069	7913.63	12815.6	0.695491	5.92e-77	*	1.23e-79	CD36	GO:0005615//extracellular space;GO:0009897//external side of plasma membrane;GO:0016324//apical plasma membrane;GO:0030666//endocytic vesicle membrane;GO:0031526//brush border membrane;GO:0045335//phagocytic vesicle;GO:0045121//membrane raft;GO:0005887//integral component of plasma membrane;GO:0005794//Golgi apparatus;GO:0005829//cytosol;GO:0005581//collagen trimer;GO:0031092//platelet alpha gran…	GO:0008289//lipid binding;GO:0005041//low-density lipoprotein receptor activity;GO:0030169//low-density lipoprotein particle binding;GO:0070053//thrombospondin receptor activity;GO:0070892//lipoteichoic acid receptor activity;GO:0008035//high-density lipoprotein particle binding;GO:0050431//transforming growth factor beta binding	GO:0010744//positive regulation of macrophage derived foam cell differentiation;GO:0050731//positive regulation of peptidyl-tyrosine phosphorylation;GO:0060100//positive regulation of phagocytosis, engulfment;GO:0071222//cellular response to lipopolysaccharide;GO:0007166//cell surface receptor signaling pathway;GO:0007263//nitric oxide mediated signal transduction;GO:2000334//positive regulation …	K06259//CD36 antigen	gi|583966140|ref|NP_001276837.1|//platelet glycoprotein 4 isoform 2 [Homo sapiens];gi|48375176|ref|NP_001001547.1|//platelet glycoprotein 4 isoform 1 [Homo sapiens];gi|583966150|ref|NP_001276840.1|//platelet glycoprotein 4 isoform 4 [Homo sapiens];gi|583966144|ref|NP_001276838.1|//platelet glycoprotein 4 isoform 3 [Homo sapiens]
8339	445	9.12758	14.7764	0.694993	0.178498	*	0.0690739	HIST1H2BG	GO:0070062//extracellular vesicular exosome;GO:0005615//extracellular space;GO:0005654//nucleoplasm;GO:0005737//cytoplasm;GO:0000788//nuclear nucleosome	GO:0003677//DNA binding;GO:0046982//protein heterodimerization activity	GO:0006334//nucleosome assembly;GO:0042742//defense response to bacterium	K11252//histone H2B	gi|829934945|ref|XP_012596776.1|//PREDICTED: histone H2B type 1-like [Microcebus murinus]
5031	1786	14.0958	22.8173	0.694864	0.116291	*	0.0406647	P2RY6	GO:0016323//basolateral plasma membrane;GO:0005887//integral component of plasma membrane;GO:0016324//apical plasma membrane	GO:0045028//G-protein coupled purinergic nucleotide receptor activity;GO:0005515//protein binding;GO:0045029//UDP-activated nucleotide receptor activity	GO:0007200//phospholipase C-activating G-protein coupled receptor signaling pathway;GO:0030321//transepithelial chloride transport;GO:0035589//G-protein coupled purinergic nucleotide receptor signaling pathway;GO:0014911//positive regulation of smooth muscle cell migration	K04272//pyrimidinergic receptor P2Y, G protein-coupled, 6	gi|469832291|ref|NP_001264137.1|//P2Y purinoceptor 6 isoform 2 [Homo sapiens];gi|767968292|ref|XP_011543378.1|//PREDICTED: P2Y purinoceptor 6 isoform X3 [Homo sapiens]
8614	5361	1440.85	2331.91	0.694596	1.34e-44	*	6.85e-47	STC2	GO:0005615//extracellular space;GO:0005783//endoplasmic reticulum;GO:0005794//Golgi apparatus;GO:0048471//perinuclear region of cytoplasm	GO:0020037//heme binding;GO:0019899//enzyme binding;GO:0042803//protein homodimerization activity;GO:0005179//hormone activity	GO:0071456//cellular response to hypoxia;GO:0046697//decidualization;GO:0007267//cell-cell signaling;GO:0043434//response to peptide hormone;GO:0007166//cell surface receptor signaling pathway;GO:0033280//response to vitamin D;GO:0007566//embryo implantation;GO:0006979//response to oxidative stress;GO:2001256//regulation of store-operated calcium entry;GO:0040015//negative regulation of multicell…	NA	gi|4507267|ref|NP_003705.1|//stanniocalcin-2 precursor [Homo sapiens]
3656	3469	376.014	608.286	0.693962	4.18e-14	*	1.52e-15	IRAK2	GO:0010008//endosome membrane;GO:0005634//nucleus;GO:0005829//cytosol;GO:0005886//plasma membrane	GO:0004674//protein serine/threonine kinase activity;GO:0005524//ATP binding;GO:0046982//protein heterodimerization activity;GO:0042803//protein homodimerization activity	GO:0035666//TRIF-dependent toll-like receptor signaling pathway;GO:0070498//interleukin-1-mediated signaling pathway;GO:0034134//toll-like receptor 2 signaling pathway;GO:0001959//regulation of cytokine-mediated signaling pathway;GO:0008063//Toll signaling pathway;GO:0031663//lipopolysaccharide-mediated signaling pathway;GO:0032088//negative regulation of NF-kappaB transcription factor activity;G…	K04731//interleukin-1 receptor-associated kinase 2 [EC:2.7.11.1]	gi|58530886|ref|NP_001561.3|//interleukin-1 receptor-associated kinase-like 2 [Homo sapiens]
316	4867	32.3793	52.3432	0.692932	0.0233763	*	0.00619628	AOX1	GO:0070062//extracellular vesicular exosome;GO:0005829//cytosol	GO:0009055//electron carrier activity;GO:0016614//oxidoreductase activity, acting on CH-OH group of donors;GO:0051537//2 iron, 2 sulfur cluster binding;GO:0005506//iron ion binding;GO:0050660//flavin adenine dinucleotide binding;GO:0004854//xanthine dehydrogenase activity;GO:0051287//NAD binding;GO:0004031//aldehyde oxidase activity;GO:0043546//molybdopterin cofactor binding	GO:0072593//reactive oxygen species metabolic process;GO:0006954//inflammatory response	K00157//aldehyde oxidase [EC:1.2.3.1]	gi|71773480|ref|NP_001150.3|//aldehyde oxidase [Homo sapiens];gi|767917828|ref|XP_011509364.1|//PREDICTED: aldehyde oxidase isoform X1 [Homo sapiens]
25823	1486	1.39397	2.2534	0.692897	0.159737	*	0.0598055	TPSG1	GO:0005887//integral component of plasma membrane	GO:0004252//serine-type endopeptidase activity	GO:0006508//proteolysis	K09615//tryptase gamma 1 [EC:3.4.21.-]	gi|156938340|ref|NP_036599.3|//tryptase gamma preproprotein [Homo sapiens];gi|767987106|ref|XP_011520748.1|//PREDICTED: tryptase gamma isoform X1 [Homo sapiens]
9369	8659	5.71605	9.23616	0.692274	0.218129	*	0.088969	NRXN3	GO:0005887//integral component of plasma membrane;GO:0043234//protein complex;GO:0016021//integral component of membrane;GO:0098793//null	GO:0046872//metal ion binding;GO:0050839//cell adhesion molecule binding;GO:0097109//neuroligin family protein binding;GO:0004888//transmembrane signaling receptor activity;GO:0005246//calcium channel regulator activity	GO:0007155//cell adhesion;GO:0007269//neurotransmitter secretion;GO:0001525//angiogenesis;GO:0007411//axon guidance;GO:0051965//positive regulation of synapse assembly;GO:0090129//positive regulation of synapse maturation	K07377//neurexin	gi|675699511|ref|XP_008959243.1|//PREDICTED: neurexin 3 isoform X5 [Pan paniscus];gi|397474986|ref|XP_003808936.1|//PREDICTED: neurexin 3 isoform X6 [Pan paniscus];gi|433804821|ref|NP_001258949.1|//neurexin 3 isoform 4 precursor [Homo sapiens];gi|41350305|ref|NP_620426.2|//neurexin 3 isoform 2 precursor [Homo sapiens];gi|694957190|ref|XP_009426491.1|//PREDICTED: neurexin 3 isoform X8 [Pan troglod…
2118	2138	146.316	236.256	0.691264	1.04e-06	*	1.02e-07	ETV4	GO:0005654//nucleoplasm;GO:0005730//nucleolus	GO:0000978//RNA polymerase II core promoter proximal region sequence-specific DNA binding;GO:0005515//protein binding;GO:0001077//RNA polymerase II core promoter proximal region sequence-specific DNA binding transcription factor activity involved in positive regulation of transcription	GO:0048863//stem cell differentiation;GO:0060762//regulation of branching involved in mammary gland duct morphogenesis;GO:0008045//motor neuron axon guidance;GO:0033600//negative regulation of mammary gland epithelial cell proliferation;GO:0045893//positive regulation of transcription, DNA-templated	K15592//ets translocation variant 4	gi|767994023|ref|XP_011522814.1|//PREDICTED: ETS translocation variant 4 isoform X2 [Homo sapiens];gi|767994027|ref|XP_011522816.1|//PREDICTED: ETS translocation variant 4 isoform X3 [Homo sapiens];gi|5733847|gb|AAB03569.2|//EWS protein/E1A enhancer binding protein chimera [Homo sapiens];gi|602288|gb|AAA95991.1|//adenovirus E1A enhancer binding protein, partial [Homo sapiens]
57586	5184	4.06487	6.56232	0.690998	0.234535	*	0.0977217	SYT13	GO:0005887//integral component of plasma membrane;GO:0030133//transport vesicle;GO:0098793//null	GO:0005544//calcium-dependent phospholipid binding;GO:0030276//clathrin binding;GO:0005509//calcium ion binding;GO:0019905//syntaxin binding	GO:0016192//vesicle-mediated transport	K19913//null	gi|24308233|ref|NP_065877.1|//synaptotagmin-13 isoform 1 [Homo sapiens]
54751	2582	167.607	270.452	0.69029	1.86e-07	*	1.59e-08	FBLIM1	GO:0001725//stress fiber;GO:0005925//focal adhesion;GO:0005938//cell cortex;GO:0005829//cytosol	GO:0008270//zinc ion binding;GO:0031005//filamin binding	GO:0033623//regulation of integrin activation;GO:0034329//cell junction assembly;GO:0008360//regulation of cell shape	K10447//kelch-like protein 9/13;K06273//zyxin	gi|694883557|ref|XP_009447237.1|//PREDICTED: filamin-binding LIM protein 1 isoform X4 [Pan troglodytes];gi|66932988|ref|NP_001019387.1|//filamin-binding LIM protein 1 isoform c [Homo sapiens];gi|66932982|ref|NP_060026.2|//filamin-binding LIM protein 1 isoform a [Homo sapiens];gi|767904734|ref|XP_011539920.1|//PREDICTED: filamin-binding LIM protein 1 isoform X4 [Homo sapiens];gi|66932986|ref|NP_00…
80022	5548	168.235	271.305	0.689435	1.53e-06	*	1.53e-07	MYO15B	NA	NA	NA	K10361//myosin XV	gi|931601998|ref|XP_014197691.1|//PREDICTED: LOW QUALITY PROTEIN: unconventional myosin-XV-like [Pan paniscus];gi|822885214|ref|NP_001296171.1|//myosin XVB [Homo sapiens];gi|426346870|ref|XP_004041092.1|//PREDICTED: unconventional myosin-XV-like [Gorilla gorilla gorilla]
64174	1337	1.39634	2.25176	0.689411	0.161332	*	0.0606874	DPEP2	GO:0031225//anchored component of membrane	GO:0046872//metal ion binding;GO:0008235//metalloexopeptidase activity;GO:0008239//dipeptidyl-peptidase activity;GO:0016805//dipeptidase activity	GO:0006508//proteolysis	K01273//membrane dipeptidase [EC:3.4.13.19]	gi|767990372|ref|XP_011521570.1|//PREDICTED: dipeptidase 2 isoform X2 [Homo sapiens];gi|767990360|ref|XP_011521564.1|//PREDICTED: dipeptidase 2 isoform X1 [Homo sapiens];gi|767990388|ref|XP_011521576.1|//PREDICTED: dipeptidase 2 isoform X8 [Homo sapiens];gi|767990376|ref|XP_011521572.1|//PREDICTED: dipeptidase 2 isoform X4 [Homo sapiens];gi|119603609|gb|EAW83203.1|//dipeptidase 2, isoform CRA_c […
79861	1695	2.0347	3.28053	0.689113	0.20964	*	0.0845918	TUBAL3	GO:0005874//microtubule;GO:0005737//cytoplasm	GO:0005200//structural constituent of cytoskeleton;GO:0005525//GTP binding;GO:0003924//GTPase activity	GO:0051258//protein polymerization;GO:0007017//microtubule-based process	K07374//tubulin alpha	gi|285395246|ref|NP_001165335.1|//tubulin alpha chain-like 3 isoform 2 [Homo sapiens];gi|13376181|ref|NP_079079.1|//tubulin alpha chain-like 3 isoform 1 [Homo sapiens]
3006	732	1087.95	1753.86	0.688925	2.95e-36	*	2.14e-38	HIST1H1C	GO:0005719//nuclear euchromatin;GO:0035327//transcriptionally active chromatin;GO:0000786//nucleosome	GO:0005515//protein binding;GO:0031490//chromatin DNA binding	GO:0006334//nucleosome assembly	K11275//histone H1/5	gi|4885375|ref|NP_005310.1|//histone H1.2 [Homo sapiens]
10053	1756	634.947	1023.48	0.688774	9.36e-22	*	1.67e-23	AP1M2	GO:0005765//lysosomal membrane;GO:0032588//trans-Golgi network membrane;GO:0005829//cytosol;GO:0030131//clathrin adaptor complex;GO:0030669//clathrin-coated endocytic vesicle membrane	GO:0005515//protein binding	GO:0006605//protein targeting;GO:0006903//vesicle targeting;GO:0019886//antigen processing and presentation of exogenous peptide antigen via MHC class II;GO:0006892//post-Golgi vesicle-mediated transport;GO:0050690//regulation of defense response to virus by virus;GO:0016032//viral process	K12393//AP-1 complex subunit mu	gi|666875873|ref|NP_001287816.1|//AP-1 complex subunit mu-2 isoform 1 [Homo sapiens];gi|9506797|ref|NP_005489.2|//AP-1 complex subunit mu-2 isoform 2 [Homo sapiens]
6795	1120	5.84692	9.42345	0.688578	0.227928	*	0.0941164	AURKC	GO:0051233//spindle midzone;GO:0000780//condensed nuclear chromosome, centromeric region;GO:0005737//cytoplasm;GO:0031616//spindle pole centrosome;GO:0032133//chromosome passenger complex;GO:0005876//spindle microtubule;GO:0030496//midbody	GO:0004712//protein serine/threonine/tyrosine kinase activity;GO:0005524//ATP binding;GO:0035174//histone serine kinase activity	GO:0006468//protein phosphorylation;GO:0008608//attachment of spindle microtubules to kinetochore;GO:0016570//histone modification;GO:0051256//mitotic spindle midzone assembly	K11480//aurora kinase C [EC:2.7.11.1]	gi|62865639|ref|NP_001015878.1|//aurora kinase C isoform 1 [Homo sapiens];gi|62865641|ref|NP_001015879.1|//aurora kinase C isoform 2 [Homo sapiens]
2081	8834	221.321	355.397	0.683288	1.23e-08	*	8.98e-10	ERN1	GO:0030176//integral component of endoplasmic reticulum membrane;GO:1990332//Ire1 complex;GO:1990630//null;GO:0005637//nuclear inner membrane;GO:0005739//mitochondrion;GO:1990604//null;GO:1990597//null	GO:0000287//magnesium ion binding;GO:0005524//ATP binding;GO:0042803//protein homodimerization activity;GO:0043531//ADP binding;GO:0004521//endoribonuclease activity;GO:0051879//Hsp90 protein binding;GO:0004674//protein serine/threonine kinase activity;GO:0030544//Hsp70 protein binding;GO:0019899//enzyme binding	GO:0006397//mRNA processing;GO:0006355//regulation of transcription, DNA-templated;GO:0006987//activation of signaling protein activity involved in unfolded protein response;GO:0007050//cell cycle arrest;GO:1900103//positive regulation of endoplasmic reticulum unfolded protein response;GO:0046777//protein autophosphorylation	K08852//serine/threonine-protein kinase/endoribonuclease IRE1 [EC:2.7.11.1 3.1.26.-]	gi|153946421|ref|NP_001424.3|//serine/threonine-protein kinase/endoribonuclease IRE1 precursor [Homo sapiens];gi|967185546|ref|XP_014975584.1|//PREDICTED: serine/threonine-protein kinase/endoribonuclease IRE1 isoform X2 [Macaca mulatta]
8370	396	135.961	218.32	0.683255	5.05e-06	*	5.54e-07	HIST2H4A	NA	NA	NA	K11254//histone H4	gi|671000647|ref|XP_008691182.1|//PREDICTED: histone H4-like [Ursus maritimus]
554313	396	135.961	218.32	0.683255	5.05e-06	*	5.54e-07	HIST2H4B	NA	NA	NA	K11254//histone H4	gi|671000647|ref|XP_008691182.1|//PREDICTED: histone H4-like [Ursus maritimus]
130271	6941	11.7296	18.8273	0.682679	0.151831	*	0.0561609	PLEKHH2	GO:0030864//cortical actin cytoskeleton;GO:0005886//plasma membrane;GO:0030027//lamellipodium	GO:0003779//actin binding;GO:0042802//identical protein binding	GO:0030835//negative regulation of actin filament depolymerization	K12559//myosin X;K10359//myosin VII;K20642//null;K20463//null;K10417//dynein light intermediate chain 2, cytosolic	gi|119620698|gb|EAX00293.1|//hCG2039966, isoform CRA_a, partial [Homo sapiens];gi|217416392|ref|NP_742066.2|//pleckstrin homology domain-containing family H member 2 [Homo sapiens]
2523	4153	56.3954	90.5114	0.682522	0.0040763	*	0.000857328	FUT1	GO:0005887//integral component of plasma membrane;GO:0032580//Golgi cisterna membrane	GO:0008107//galactoside 2-alpha-L-fucosyltransferase activity	GO:0042355//L-fucose catabolic process;GO:0006486//protein glycosylation	K00718//galactoside 2-L-fucosyltransferase 1/2 [EC:2.4.1.69]	gi|578834235|ref|XP_006723190.1|//PREDICTED: galactoside 2-alpha-L-fucosyltransferase 1 isoform X1 [Homo sapiens]
115727	2668	4.72004	7.57512	0.682469	0.238182	*	0.0997788	RASGRP4	GO:0005829//cytosol;GO:0005886//plasma membrane	GO:0005088//Ras guanyl-nucleotide exchange factor activity;GO:0005509//calcium ion binding;GO:0030742//GTP-dependent protein binding;GO:0019992//diacylglycerol binding	GO:0009991//response to extracellular stimulus;GO:0030099//myeloid cell differentiation;GO:0016049//cell growth;GO:0008277//regulation of G-protein coupled receptor protein signaling pathway;GO:0007169//transmembrane receptor protein tyrosine kinase signaling pathway;GO:0046579//positive regulation of Ras protein signal transduction;GO:0008283//cell proliferation;GO:0007202//activation of phospho…	K12363//RAS guanyl-releasing protein 4	gi|226246584|ref|NP_001139678.1|//RAS guanyl-releasing protein 4 isoform f [Homo sapiens];gi|226246586|ref|NP_001139679.1|//RAS guanyl-releasing protein 4 isoform g [Homo sapiens];gi|26051258|ref|NP_733749.1|//RAS guanyl-releasing protein 4 isoform a [Homo sapiens];gi|226246575|ref|NP_001139674.1|//RAS guanyl-releasing protein 4 isoform b [Homo sapiens];gi|226246579|ref|NP_001139676.1|//RAS guany…
286133	4170	1088.99	1747.25	0.682099	1.86e-32	*	1.56e-34	SCARA5	GO:0009986//cell surface;GO:0005887//integral component of plasma membrane	GO:0070287//ferritin receptor activity;GO:0005044//scavenger receptor activity	GO:0006879//cellular iron ion homeostasis;GO:0034755//iron ion transmembrane transport;GO:0006897//endocytosis;GO:0034605//cellular response to heat;GO:0070207//protein homotrimerization	K06558//macrophage scavenger receptor 1	gi|47271477|ref|NP_776194.2|//scavenger receptor class A member 5 [Homo sapiens]
330	5202	502.575	806.074	0.681575	5.69e-18	*	1.42e-19	BIRC3	GO:0005654//nucleoplasm;GO:0045121//membrane raft;GO:0005829//cytosol;GO:0043234//protein complex;GO:0005876//spindle microtubule	GO:0005515//protein binding;GO:0043027//cysteine-type endopeptidase inhibitor activity involved in apoptotic process;GO:0008270//zinc ion binding;GO:0004842//ubiquitin-protein transferase activity;GO:0016874//ligase activity	GO:0034121//regulation of toll-like receptor signaling pathway;GO:0038061//NIK/NF-kappaB signaling;GO:0007166//cell surface receptor signaling pathway;GO:0043066//negative regulation of apoptotic process;GO:0060546//negative regulation of necroptotic process;GO:2000116//regulation of cysteine-type endopeptidase activity;GO:0042326//negative regulation of phosphorylation;GO:0070424//regulation of …	K16060//baculoviral IAP repeat-containing protein 2/3	gi|4502139|ref|NP_001156.1|//baculoviral IAP repeat-containing protein 3 [Homo sapiens]
147670	2542	9.46091	15.1647	0.680669	0.185969	*	0.0728595	SMIM17	GO:0016021//integral component of membrane	NA	NA	NA	gi|302318930|ref|NP_001180557.1|//small integral membrane protein 17 [Homo sapiens];gi|795350819|ref|XP_011931527.1|//PREDICTED: small integral membrane protein 17 [Cercocebus atys]
56911	2031	3.70187	5.92874	0.679471	0.245802	*	0.103769	MAP3K7CL	GO:0005634//nucleus;GO:0005829//cytosol	GO:0004709//MAP kinase kinase kinase activity;GO:0005515//protein binding	NA	K04427//mitogen-activated protein kinase kinase kinase 7 [EC:2.7.11.25]	gi|557786206|ref|NP_001273551.1|//MAP3K7 C-terminal-like protein isoform 3 [Homo sapiens] ;gi|9910146|ref|NP_064537.1|//MAP3K7 C-terminal-like protein isoform 1 [Homo sapiens];gi|557786198|ref|NP_001273546.1|//MAP3K7 C-terminal-like protein isoform 2 [Homo sapiens];gi|557786208|ref|NP_001273552.1|//MAP3K7 C-terminal-like protein isoform 4 [Homo sapiens]
43847	1022	1.02229	1.63678	0.679053	0.125796	*	0.0446459	KLK14	GO:0070062//extracellular vesicular exosome;GO:0005615//extracellular space	GO:0004252//serine-type endopeptidase activity	GO:0045745//positive regulation of G-protein coupled receptor protein signaling pathway;GO:0048730//epidermis morphogenesis;GO:0006508//proteolysis;GO:0009566//fertilization;GO:0045744//negative regulation of G-protein coupled receptor protein signaling pathway;GO:0070684//seminal clot liquefaction	K09622//kallikrein 14 [EC:3.4.21.-]	gi|91823048|ref|NP_071329.2|//kallikrein-14 preproprotein [Homo sapiens]
255022	3056	2.42502	3.88178	0.678725	0.227485	*	0.0938388	CALHM1	GO:0005887//integral component of plasma membrane;GO:0005789//endoplasmic reticulum membrane	GO:0005245//voltage-gated calcium channel activity;GO:0042802//identical protein binding;GO:0005227//calcium activated cation channel activity	GO:0050916//sensory perception of sweet taste;GO:0050917//sensory perception of umami taste;GO:0015867//ATP transport;GO:0050913//sensory perception of bitter taste;GO:0034765//regulation of ion transmembrane transport;GO:0006812//cation transport;GO:0051260//protein homooligomerization	K19738//null	gi|194440685|ref|NP_001001412.3|//calcium homeostasis modulator protein 1 [Homo sapiens]
23779	1725	15.856	25.3746	0.678361	0.162295	*	0.0612327	ARHGAP8	GO:0005829//cytosol	GO:0005515//protein binding;GO:0005096//GTPase activator activity	GO:0007165//signal transduction;GO:0070374//positive regulation of ERK1 and ERK2 cascade	K20633//null	gi|311213852|ref|NP_001185655.1|//rho GTPase-activating protein 8 isoform 3 [Homo sapiens];gi|689972110|ref|NP_851851.3|//PRR5-ARHGAP8 fusion protein [Homo sapiens];gi|66346662|ref|NP_001017526.1|//rho GTPase-activating protein 8 isoform 1 [Homo sapiens]
121504	412	1.40371	2.24529	0.677658	0.167306	*	0.0637692	HIST4H4	NA	NA	NA	K11254//histone H4	gi|671000647|ref|XP_008691182.1|//PREDICTED: histone H4-like [Ursus maritimus]
4862	3407	188.04	300.639	0.676988	2.75e-07	*	2.4e-08	NPAS2	GO:0005654//nucleoplasm;GO:0005667//transcription factor complex;GO:0005829//cytosol	GO:0046872//metal ion binding;GO:0051879//Hsp90 protein binding;GO:0003700//sequence-specific DNA binding transcription factor activity;GO:0001047//core promoter binding;GO:0046983//protein dimerization activity	GO:0044255//cellular lipid metabolic process;GO:0045944//positive regulation of transcription from RNA polymerase II promoter;GO:0045475//locomotor rhythm;GO:0007417//central nervous system development;GO:0042745//circadian sleep/wake cycle;GO:0044281//small molecule metabolic process	K09026//neuronal PAS domain-containing protein 2	gi|22027471|ref|NP_002509.2|//neuronal PAS domain-containing protein 2 [Homo sapiens];gi|530368665|ref|XP_005264010.1|//PREDICTED: neuronal PAS domain-containing protein 2 isoform X1 [Homo sapiens];gi|530368679|ref|XP_005264017.1|//PREDICTED: neuronal PAS domain-containing protein 2 isoform X6 [Homo sapiens];gi|530368677|ref|XP_005264016.1|//PREDICTED: neuronal PAS domain-containing protein 2 iso…
126069	3812	3.06348	4.89684	0.676681	0.244243	*	0.102941	ZNF491	GO:0005634//nucleus	GO:0003677//DNA binding;GO:0046872//metal ion binding	GO:0006355//regulation of transcription, DNA-templated	K09228//KRAB domain-containing zinc finger protein	gi|31542772|ref|NP_689569.2|//zinc finger protein 491 [Homo sapiens]
9145	2465	4.73221	7.55496	0.674908	0.246322	*	0.10411	SYNGR1	GO:0030672//synaptic vesicle membrane;GO:0016021//integral component of membrane;GO:0030054//cell junction;GO:0031594//neuromuscular junction;GO:0042470//melanosome;GO:0043195//terminal bouton	GO:0005515//protein binding	GO:0006605//protein targeting;GO:0048172//regulation of short-term neuronal synaptic plasticity;GO:0048169//regulation of long-term neuronal synaptic plasticity	K04403//TAK1-binding protein 1;K17783//mitochondrial FAD-linked sulfhydryl oxidase [EC:1.8.3.2]	gi|22035696|ref|NP_004702.2|//synaptogyrin-1 isoform 1a [Homo sapiens];gi|22035700|ref|NP_663791.1|//synaptogyrin-1 isoform 1c [Homo sapiens];gi|22035698|ref|NP_663783.1|//synaptogyrin-1 isoform 1b [Homo sapiens]
70	3693	120.318	192.075	0.67482	2.43e-05	*	3.02e-06	ACTC1	GO:0016020//membrane;GO:0070062//extracellular vesicular exosome;GO:0072562//blood microparticle;GO:0005925//focal adhesion;GO:0030027//lamellipodium;GO:0030175//filopodium;GO:0044297//cell body;GO:0042643//actomyosin, actin portion;GO:0005829//cytosol;GO:0031674//I band	GO:0005524//ATP binding;GO:0017022//myosin binding;GO:0016887//ATPase activity	GO:0042493//response to drug;GO:0030049//muscle filament sliding;GO:0006915//apoptotic process;GO:0045471//response to ethanol;GO:0055008//cardiac muscle tissue morphogenesis;GO:0060048//cardiac muscle contraction;GO:0055003//cardiac myofibril assembly;GO:0030240//skeletal muscle thin filament assembly	K12314//actin, alpha cardiac muscle	gi|726987387|ref|XP_010390022.1|//PREDICTED: actin, alpha cardiac muscle 1 [Corvus cornix cornix]
54101	3890	2.17627	3.47165	0.673767	0.213657	*	0.0867264	RIPK4	GO:0016020//membrane;GO:0005737//cytoplasm	GO:0004674//protein serine/threonine kinase activity;GO:0005515//protein binding;GO:0005524//ATP binding	GO:0002009//morphogenesis of an epithelium	K08848//receptor-interacting serine/threonine-protein kinase 4 [EC:2.7.11.1]	gi|41327754|ref|NP_065690.2|//receptor-interacting serine/threonine-protein kinase 4 [Homo sapiens]
148252	3412	3.07197	4.89912	0.673358	0.247014	*	0.104505	DIRAS1	GO:0005622//intracellular;GO:0005886//plasma membrane	GO:0051019//mitogen-activated protein kinase binding;GO:0005525//GTP binding;GO:0003924//GTPase activity	GO:0007264//small GTPase mediated signal transduction	K07840//DIRAS family, GTP-binding Ras-like 1	gi|768000952|ref|XP_011526015.1|//PREDICTED: GTP-binding protein Di-Ras1 isoform X1 [Homo sapiens];gi|21553323|ref|NP_660156.1|//GTP-binding protein Di-Ras1 [Homo sapiens]
6261	15254	1.15356	1.83892	0.672763	0.127222	*	0.0452578	RYR1	GO:0005790//smooth endoplasmic reticulum;GO:0030315//T-tubule;GO:0070062//extracellular vesicular exosome;GO:0005938//cell cortex;GO:0014802//terminal cisterna;GO:0014701//junctional sarcoplasmic reticulum membrane;GO:0030314//junctional membrane complex;GO:0005887//integral component of plasma membrane;GO:0031674//I band	GO:0002020//protease binding;GO:0005219//ryanodine-sensitive calcium-release channel activity;GO:0005245//voltage-gated calcium channel activity;GO:0005509//calcium ion binding;GO:0005516//calmodulin binding	GO:0014808//release of sequestered calcium ion into cytosol by sarcoplasmic reticulum;GO:0043588//skin development;GO:0006936//muscle contraction;GO:0071313//cellular response to caffeine;GO:0043931//ossification involved in bone maturation;GO:0003151//outflow tract morphogenesis;GO:0048741//skeletal muscle fiber development;GO:0001666//response to hypoxia	K04961//ryanodine receptor 1	gi|113204617|ref|NP_001036188.1|//ryanodine receptor 1 isoform 2 [Homo sapiens];gi|768010467|ref|XP_011525507.1|//PREDICTED: ryanodine receptor 1 isoform X4 [Homo sapiens];gi|1216475|gb|AAC51191.1|//skeletal muscle ryanodine receptor [Homo sapiens]
102724229	2519	40.0094	63.7201	0.671408	0.0307583	*	0.00852195	LOC102724229	NA	NA	NA	NA	gi|578814919|ref|XP_006716285.1|//PREDICTED: uncharacterized protein LOC102724229 [Homo sapiens]
145873	1614	13.7176	21.8398	0.670935	0.138309	*	0.050204	MESP2	GO:0070062//extracellular vesicular exosome;GO:0005634//nucleus	GO:0003677//DNA binding;GO:0046983//protein dimerization activity	GO:0045944//positive regulation of transcription from RNA polymerase II promoter;GO:0001756//somitogenesis;GO:0007219//Notch signaling pathway;GO:0008078//mesodermal cell migration;GO:0023019//signal transduction involved in regulation of gene expression	K09076//mesoderm posterior	gi|90403598|ref|NP_001035047.1|//mesoderm posterior protein 2 [Homo sapiens]
118663	1958	8.07055	12.8489	0.670903	0.212674	*	0.0861692	BTBD16	NA	NA	NA	K10487//BTB/POZ domain-containing protein 16	gi|50345833|ref|NP_653188.2|//BTB/POZ domain-containing protein 16 isoform b [Homo sapiens];gi|970598234|ref|NP_001305118.1|//BTB/POZ domain-containing protein 16 isoform a [Homo sapiens];gi|767961489|ref|XP_011537542.1|//PREDICTED: BTB/POZ domain-containing protein 16 isoform X3 [Homo sapiens];gi|767961491|ref|XP_011537543.1|//PREDICTED: BTB/POZ domain-containing protein 16 isoform X4 [Homo sapi…
100130827	1459	20.3917	32.4617	0.670757	0.0816322	*	0.026844	SBK3	NA	GO:0004674//protein serine/threonine kinase activity;GO:0005524//ATP binding	NA	K08858//serine/threonine-protein kinase SBK [EC:2.7.11.1]	gi|768005753|ref|XP_011524600.1|//PREDICTED: uncharacterized serine/threonine-protein kinase SBK3 isoform X1 [Homo sapiens];gi|315259113|ref|NP_001186753.1|//uncharacterized serine/threonine-protein kinase SBK3 [Homo sapiens]
431705	3080	13.0713	20.8049	0.670523	0.151058	*	0.0557644	ASTL	GO:0030133//transport vesicle;GO:0060473//cortical granule;GO:0005886//plasma membrane	GO:0004222//metalloendopeptidase activity;GO:0070001//aspartic-type peptidase activity;GO:0008270//zinc ion binding;GO:0070002//glutamic-type peptidase activity	GO:0060468//prevention of polyspermy;GO:0007155//cell adhesion;GO:0006508//proteolysis;GO:0010954//positive regulation of protein processing;GO:2000360//negative regulation of binding of sperm to zona pellucida	K08778//astacin-like metalloendopeptidase [EC:3.4.-.-]	gi|157502169|ref|NP_001002036.3|//astacin-like metalloendopeptidase precursor [Homo sapiens]
377007	3685	31.0375	49.3921	0.67027	0.0344823	*	0.00977283	KLHL30	GO:0031463//Cul3-RING ubiquitin ligase complex	GO:0004842//ubiquitin-protein transferase activity	NA	K10466//kelch-like protein 30	gi|284413702|ref|NP_940984.3|//kelch-like protein 30 [Homo sapiens]
1545	5160	2670.03	4245.23	0.668988	1.59e-69	*	4.45e-72	CYP1B1	GO:0031090//organelle membrane;GO:0016021//integral component of membrane;GO:0005739//mitochondrion;GO:0005789//endoplasmic reticulum membrane	GO:0020037//heme binding;GO:0005506//iron ion binding;GO:0070330//aromatase activity;GO:0019825//oxygen binding	GO:0001525//angiogenesis;GO:0043542//endothelial cell migration;GO:0009404//toxin metabolic process;GO:0006725//cellular aromatic compound metabolic process;GO:0006805//xenobiotic metabolic process;GO:0007601//visual perception;GO:0055114//oxidation-reduction process;GO:0009636//response to toxic substance;GO:0044281//small molecule metabolic process;GO:0071603//endothelial cell-cell adhesion;GO:…	K07410//cytochrome P450, family 1, subfamily B, polypeptide 1 [EC:1.14.14.1]	gi|189491763|ref|NP_000095.2|//cytochrome P450 1B1 [Homo sapiens]
149345	1657	121.911	193.793	0.668692	2.01e-05	*	2.47e-06	SHISA4	GO:0016021//integral component of membrane	NA	NA	K10135//scotin	gi|269973884|ref|NP_937792.2|//protein shisa-4 precursor [Homo sapiens]
388581	897	5.76642	9.16353	0.668226	0.246228	*	0.103983	FAM132A	GO:0005615//extracellular space	GO:0005179//hormone activity	GO:0046326//positive regulation of glucose import;GO:0051897//positive regulation of protein kinase B signaling;GO:0035774//positive regulation of insulin secretion involved in cellular response to glucose stimulus;GO:0046628//positive regulation of insulin receptor signaling pathway;GO:0045721//negative regulation of gluconeogenesis;GO:0050728//negative regulation of inflammatory response	NA	gi|767904265|ref|XP_011539737.1|//PREDICTED: adipolin isoform X1 [Homo sapiens];gi|767904269|ref|XP_011539739.1|//PREDICTED: adipolin isoform X3 [Homo sapiens];gi|121949746|ref|NP_001014980.1|//adipolin precursor [Homo sapiens];gi|767904267|ref|XP_011539738.1|//PREDICTED: adipolin isoform X2 [Homo sapiens]
2078	4703	1.02667	1.63127	0.668021	0.130935	*	0.0469285	ERG	GO:0005634//nucleus;GO:0009986//cell surface;GO:0030529//ribonucleoprotein complex;GO:0008076//voltage-gated potassium channel complex;GO:0048471//perinuclear region of cytoplasm	GO:0000981//sequence-specific DNA binding RNA polymerase II transcription factor activity;GO:0055131//C3HC4-type RING finger domain binding;GO:0005242//inward rectifier potassium channel activity;GO:0031625//ubiquitin protein ligase binding;GO:0005251//delayed rectifier potassium channel activity;GO:0042803//protein homodimerization activity;GO:0000155//phosphorelay sensor kinase activity;GO:0097…	GO:0007165//signal transduction;GO:0006355//regulation of transcription, DNA-templated;GO:0006936//muscle contraction;GO:0006468//protein phosphorylation;GO:0086091//regulation of heart rate by cardiac conduction;GO:0008283//cell proliferation;GO:0007275//multicellular organismal development;GO:0007268//synaptic transmission;GO:0071805//potassium ion transmembrane transport;GO:0060307//regulation…	K09435//transcriptional regulator ERG	gi|33667107|ref|NP_891548.1|//transcriptional regulator ERG isoform 1 [Homo sapiens];gi|609878488|ref|NP_001278320.1|//transcriptional regulator ERG isoform 7 [Homo sapiens];gi|209954797|ref|NP_001129626.1|//transcriptional regulator ERG isoform 3 [Homo sapiens];gi|343478184|ref|NP_001230361.1|//transcriptional regulator ERG isoform 6 [Homo sapiens];gi|767875800|gb|AJT59682.1|//erythroblast trans…
107986531	1401	3.46475	5.50503	0.668001	0.253906	*	0.108266	LOC107986531	NA	NA	NA	NA	gi|635097758|ref|XP_007972097.1|//PREDICTED: CCAAT/enhancer-binding protein alpha-like [Chlorocebus sabaeus]
1436	3923	27.0999	43.055	0.66789	0.0523281	*	0.0158995	CSF1R	GO:0009986//cell surface;GO:0005887//integral component of plasma membrane;GO:0005622//intracellular;GO:1990682//null	GO:0005019//platelet-derived growth factor beta-receptor activity;GO:0019955//cytokine binding;GO:0005011//macrophage colony-stimulating factor receptor activity;GO:0005524//ATP binding;GO:0019903//protein phosphatase binding;GO:0042803//protein homodimerization activity	GO:0030335//positive regulation of cell migration;GO:0030316//osteoclast differentiation;GO:0090197//positive regulation of chemokine secretion;GO:0045217//cell-cell junction maintenance;GO:0007169//transmembrane receptor protein tyrosine kinase signaling pathway;GO:0045124//regulation of bone resorption;GO:0071902//positive regulation of protein serine/threonine kinase activity;GO:0030225//macro…	K05090//macrophage colony-stimulating factor 1 receptor [EC:2.7.10.1]	gi|27262659|ref|NP_005202.2|//macrophage colony-stimulating factor 1 receptor precursor [Homo sapiens]
441425	3930	5.14924	8.18037	0.667807	0.256371	*	0.109773	ANKRD20A3	GO:0005886//plasma membrane	NA	NA	K17299//POTE ankyrin domain family protein	gi|767954891|ref|XP_011516179.1|//PREDICTED: ankyrin repeat domain-containing protein 20A2 isoform X1 [Homo sapiens];gi|60460920|ref|NP_001012419.1|//ankyrin repeat domain-containing protein 20A3 [Homo sapiens];gi|530427585|ref|XP_005272582.1|//PREDICTED: ankyrin repeat domain-containing protein 20A3 isoform X2 [Homo sapiens];gi|767955917|ref|XP_011542162.1|//PREDICTED: ankyrin repeat domain-cont…
56655	710	378.746	601.686	0.667781	6.39e-14	*	2.41e-15	POLE4	GO:0005671//Ada2/Gcn5/Ada3 transcription activator complex;GO:0008622//epsilon DNA polymerase complex	GO:0003677//DNA binding;GO:0003887//DNA-directed DNA polymerase activity;GO:0046982//protein heterodimerization activity	GO:0043966//histone H3 acetylation	K03506//DNA polymerase epsilon subunit 4 [EC:2.7.7.7]	gi|38455394|ref|NP_063949.2|//DNA polymerase epsilon subunit 4 [Homo sapiens]
5468	1829	1287.42	2043.74	0.666732	7.13e-40	*	4.32e-42	PPARG	GO:0090575//RNA polymerase II transcription factor complex;GO:0005654//nucleoplasm;GO:0005794//Golgi apparatus;GO:0005829//cytosol;GO:0048471//perinuclear region of cytoplasm	GO:0003707//steroid hormone receptor activity;GO:0030331//estrogen receptor binding;GO:0001046//core promoter sequence-specific DNA binding;GO:0042802//identical protein binding;GO:0019903//protein phosphatase binding;GO:0030374//ligand-dependent nuclear receptor transcription coactivator activity;GO:0004879//ligand-activated sequence-specific DNA binding RNA polymerase II transcription factor ac…	GO:0008217//regulation of blood pressure;GO:0010891//negative regulation of sequestering of triglyceride;GO:0031100//organ regeneration;GO:0048714//positive regulation of oligodendrocyte differentiation;GO:0001890//placenta development;GO:0046321//positive regulation of fatty acid oxidation;GO:0043627//response to estrogen;GO:0042593//glucose homeostasis;GO:0031000//response to caffeine;GO:003535…	K08530//peroxisome proliferator-activated receptor gamma	gi|767923591|ref|XP_011532145.1|//PREDICTED: peroxisome proliferator-activated receptor gamma isoform X3 [Homo sapiens];gi|20336229|ref|NP_056953.2|//peroxisome proliferator-activated receptor gamma isoform 2 [Homo sapiens];gi|767923589|ref|XP_011532144.1|//PREDICTED: peroxisome proliferator-activated receptor gamma isoform X2 [Homo sapiens]
89795	9687	163.552	259.54	0.666206	8.09e-07	*	7.76e-08	NAV3	GO:0005640//nuclear outer membrane	GO:0005524//ATP binding	NA	K19483//neuron navigator 2 [EC:3.6.4.12]	gi|767975818|ref|XP_011537242.1|//PREDICTED: neuron navigator 3 isoform X2 [Homo sapiens];gi|675801220|ref|XP_008956591.1|//PREDICTED: neuron navigator 3 isoform X6 [Pan paniscus];gi|530400968|ref|XP_005269272.1|//PREDICTED: neuron navigator 3 isoform X1 [Homo sapiens];gi|675801218|ref|XP_008956590.1|//PREDICTED: neuron navigator 3 isoform X5 [Pan paniscus];gi|767975827|ref|XP_011537246.1|//PREDI…
860	4715	200.361	317.14	0.662518	3.33e-07	*	2.96e-08	RUNX2	GO:0005654//nucleoplasm;GO:0005667//transcription factor complex;GO:0000790//nuclear chromatin;GO:0005737//cytoplasm	GO:0000978//RNA polymerase II core promoter proximal region sequence-specific DNA binding;GO:0005524//ATP binding;GO:0042826//histone deacetylase binding;GO:0070491//repressing transcription factor binding;GO:0001077//RNA polymerase II core promoter proximal region sequence-specific DNA binding transcription factor activity involved in positive regulation of transcription;GO:0043425//bHLH transcr…	GO:0002063//chondrocyte development;GO:0032332//positive regulation of chondrocyte differentiation;GO:0045879//negative regulation of smoothened signaling pathway;GO:0001958//endochondral ossification;GO:0045892//negative regulation of transcription, DNA-templated;GO:0030509//BMP signaling pathway;GO:0045669//positive regulation of osteoblast differentiation;GO:0048469//cell maturation;GO:0048863…	K09278//runt-related transcription factor 2	gi|119624686|gb|EAX04281.1|//runt-related transcription factor 2, isoform CRA_e [Homo sapiens];gi|767940894|ref|XP_011513267.1|//PREDICTED: runt-related transcription factor 2 isoform X7 [Homo sapiens];gi|686722312|ref|XP_009240205.1|//PREDICTED: runt-related transcription factor 2 isoform X4 [Pongo abelii];gi|767940888|ref|XP_011513264.1|//PREDICTED: runt-related transcription factor 2 isoform X…
200916	1977	237.818	375.87	0.660377	1.74e-08	*	1.29e-09	RPL22L1	GO:0022625//cytosolic large ribosomal subunit	GO:0003735//structural constituent of ribosome	GO:0006412//translation	K02891//large subunit ribosomal protein L22e	gi|426342858|ref|XP_004038048.1|//PREDICTED: 60S ribosomal protein L22-like 1 [Gorilla gorilla gorilla];gi|1000814501|ref|NP_001307380.1|//60S ribosomal protein L22-like 1 isoform 2 [Homo sapiens]
84879	2167	60.6444	95.8273	0.660062	0.00403259	*	0.00084622	MFSD2A	GO:0005887//integral component of plasma membrane;GO:0005789//endoplasmic reticulum membrane	GO:0015293//symporter activity;GO:0005548//phospholipid transporter activity	GO:0006810//transport	K08824//cyclin-dependent kinase-like [EC:2.7.11.22]	gi|211063479|ref|NP_001129965.1|//sodium-dependent lysophosphatidylcholine symporter 1 isoform 1 [Homo sapiens];gi|42713696|ref|NP_116182.2|//sodium-dependent lysophosphatidylcholine symporter 1 isoform 2 [Homo sapiens];gi|767906461|ref|XP_011540614.1|//PREDICTED: sodium-dependent lysophosphatidylcholine symporter 1 isoform X2 [Homo sapiens];gi|568214318|ref|NP_001274737.1|//sodium-dependent lyso…
246176	3031	6.69508	10.578	0.65989	0.238175	*	0.0997618	GAS2L2	GO:0001725//stress fiber;GO:0005874//microtubule;GO:0005737//cytoplasm	GO:0051015//actin filament binding;GO:0008017//microtubule binding;GO:0008093//cytoskeletal adaptor activity	GO:0007026//negative regulation of microtubule depolymerization;GO:0001578//microtubule bundle formation;GO:0007050//cell cycle arrest	K10382//dystonin	gi|21281675|ref|NP_644814.1|//GAS2-like protein 2 [Homo sapiens]
7730	2459	8.50795	13.4377	0.659408	0.227376	*	0.0937399	ZNF177	GO:0005634//nucleus;GO:0072562//blood microparticle	GO:0003677//DNA binding;GO:0046872//metal ion binding;GO:0005515//protein binding	GO:0000122//negative regulation of transcription from RNA polymerase II promoter	K09228//KRAB domain-containing zinc finger protein	gi|289547611|ref|NP_001166122.1|//zinc finger protein 177 isoform a [Homo sapiens];gi|289547607|ref|NP_003442.2|//zinc finger protein 177 isoform b [Homo sapiens]
143241	816	9.78449	15.4525	0.659273	0.208851	*	0.0841679	DYDC1	GO:0000781//chromosome, telomeric region;GO:0048188//Set1C/COMPASS complex	GO:0005515//protein binding;GO:0042800//histone methyltransferase activity (H3-K4 specific)	NA	K03681//exosome complex component RRP40	gi|530393110|ref|XP_005269606.1|//PREDICTED: DPY30 domain-containing protein 1 isoform X2 [Homo sapiens];gi|20270377|ref|NP_620167.1|//DPY30 domain-containing protein 1 [Homo sapiens]
100506115	2028	23.703	37.4328	0.659231	0.0697612	*	0.0222361	LINC01272	NA	NA	NA	NA	gi|521258688|ref|NP_001265584.1|//uncharacterized protein LOC100506115 [Homo sapiens]
9241	1892	16.3655	25.8415	0.659036	0.122262	*	0.0431668	NOG	GO:0005615//extracellular space	GO:0019955//cytokine binding;GO:0042803//protein homodimerization activity;GO:0032403//protein complex binding	GO:0060044//negative regulation of cardiac muscle cell proliferation;GO:0060272//embryonic skeletal joint morphogenesis;GO:0048712//negative regulation of astrocyte differentiation;GO:0060425//lung morphogenesis;GO:0061053//somite development;GO:0035019//somatic stem cell maintenance;GO:0090090//negative regulation of canonical Wnt signaling pathway;GO:0021533//cell differentiation in hindbrain;G…	K04658//noggin	gi|4885523|ref|NP_005441.1|//noggin precursor [Homo sapiens]
163351	4526	5.4123	8.52332	0.655174	0.261846	*	0.112755	GBP6	GO:0070062//extracellular vesicular exosome	GO:0005525//GTP binding;GO:0003924//GTPase activity	NA	K20908//null	gi|157671915|ref|NP_940862.2|//guanylate-binding protein 6 isoform 1 [Homo sapiens];gi|998074867|ref|NP_001307186.1|//guanylate-binding protein 6 isoform 2 [Homo sapiens]
400499	7547	19.7481	31.0782	0.654187	0.10817	*	0.0373949	LOC400499	NA	NA	NA	K14462//apolipoprotein B;K07521//netrin receptor unc-5	gi|767988043|ref|XP_006721060.2|//PREDICTED: putative uncharacterized protein LOC400499 isoform X2 [Homo sapiens];gi|795309947|ref|XP_011816828.1|//PREDICTED: uncharacterized protein LOC105525710 [Colobus angolensis palliatus]
647024	6742	25.0486	39.4188	0.654151	0.0703619	*	0.0224819	C6orf132	NA	NA	NA	NA	gi|256574805|ref|NP_001157918.1|//uncharacterized protein C6orf132 [Homo sapiens]
131601	1925	878.049	1380.91	0.653249	2.72e-23	*	4.27e-25	TPRA1	GO:0016021//integral component of membrane	GO:0004930//G-protein coupled receptor activity	GO:0007186//G-protein coupled receptor signaling pathway;GO:0006629//lipid metabolic process;GO:0007568//aging	NA	gi|119599747|gb|EAW79341.1|//G protein-coupled receptor 175, isoform CRA_b, partial [Homo sapiens];gi|767925711|ref|XP_011510722.1|//PREDICTED: transmembrane protein adipocyte-associated 1 isoform X2 [Homo sapiens];gi|119599746|gb|EAW79340.1|//G protein-coupled receptor 175, isoform CRA_a [Homo sapiens]
2826	1244	7.11238	11.1766	0.652081	0.247397	*	0.104697	CCR10	GO:0005884//actin filament;GO:0009986//cell surface;GO:0005887//integral component of plasma membrane;GO:0005829//cytosol;GO:0005769//early endosome;GO:0055037//recycling endosome	GO:0005044//scavenger receptor activity;GO:0016493//C-C chemokine receptor activity;GO:0019957//C-C chemokine binding	GO:0007186//G-protein coupled receptor signaling pathway;GO:0042119//neutrophil activation;GO:0007275//multicellular organismal development;GO:0006955//immune response;GO:0007204//positive regulation of cytosolic calcium ion concentration;GO:0070098//chemokine-mediated signaling pathway;GO:0006935//chemotaxis	K04185//C-C chemokine receptor type 10	gi|156104886|ref|NP_057686.2|//C-C chemokine receptor type 10 [Homo sapiens]
64386	2661	10.9881	17.2578	0.651313	0.183669	*	0.0715221	MMP25	GO:0016021//integral component of membrane;GO:0005737//cytoplasm;GO:0005886//plasma membrane;GO:0031225//anchored component of membrane;GO:0005578//proteinaceous extracellular matrix	GO:0004222//metalloendopeptidase activity;GO:0005509//calcium ion binding;GO:0008270//zinc ion binding	GO:0006508//proteolysis;GO:0060022//hard palate development;GO:0006954//inflammatory response	K08003//matrix metalloproteinase-25 (membrane-inserted) [EC:3.4.24.-]	gi|12060394|dbj|BAB20584.1|//membrane-type 6 matrix metalloproteinase [Homo sapiens];gi|767987500|ref|XP_011520904.1|//PREDICTED: matrix metalloproteinase-25 isoform X2 [Homo sapiens];gi|767987506|ref|XP_011520907.1|//PREDICTED: matrix metalloproteinase-25 isoform X5 [Homo sapiens];gi|119605820|gb|EAW85414.1|//hCG15613, isoform CRA_b [Homo sapiens];gi|11968059|ref|NP_071913.1|//matrix metalloprot…
27019	2626	4.01127	6.29052	0.649122	0.274454	*	0.119968	DNAI1	GO:0005874//microtubule;GO:0036157//outer dynein arm;GO:0005737//cytoplasm	GO:0005515//protein binding;GO:0003774//motor activity	GO:0030030//cell projection organization;GO:0003351//epithelial cilium movement	K10409//dynein intermediate chain 1, axonemal	gi|767954811|ref|XP_011516151.1|//PREDICTED: dynein intermediate chain 1, axonemal isoform X4 [Homo sapiens];gi|767954805|ref|XP_011516149.1|//PREDICTED: dynein intermediate chain 1, axonemal isoform X2 [Homo sapiens];gi|6912338|ref|NP_036276.1|//dynein intermediate chain 1, axonemal isoform 1 [Homo sapiens];gi|767954803|ref|XP_011516148.1|//PREDICTED: dynein intermediate chain 1, axonemal isofor…
4914	2581	1.68107	2.63541	0.648647	0.220167	*	0.0899963	NTRK1	GO:0030424//axon;GO:0030425//dendrite;GO:0031410//cytoplasmic vesicle;GO:0031902//late endosome membrane;GO:0043025//neuronal cell body;GO:0043235//receptor complex;GO:0031901//early endosome membrane;GO:0009986//cell surface;GO:0005887//integral component of plasma membrane	GO:0005004//GPI-linked ephrin receptor activity;GO:0005524//ATP binding;GO:0005166//neurotrophin p75 receptor binding;GO:0019900//kinase binding;GO:0010465//nerve growth factor receptor activity;GO:0048406//nerve growth factor binding;GO:0042803//protein homodimerization activity	GO:0071316//cellular response to nicotine;GO:0048011//neurotrophin TRK receptor signaling pathway;GO:0045471//response to ethanol;GO:0051968//positive regulation of synaptic transmission, glutamatergic;GO:0045766//positive regulation of angiogenesis;GO:0007411//axon guidance;GO:0000186//activation of MAPKK activity;GO:0008285//negative regulation of cell proliferation;GO:0042493//response to drug…	K03176//neurotrophic tyrosine kinase receptor type 1 [EC:2.7.10.1]	gi|59889558|ref|NP_001012331.1|//high affinity nerve growth factor receptor isoform 1 precursor [Homo sapiens];gi|119573287|gb|EAW52902.1|//neurotrophic tyrosine kinase, receptor, type 1, isoform CRA_c [Homo sapiens];gi|56118210|ref|NP_001007793.1|//high affinity nerve growth factor receptor isoform 3 [Homo sapiens]
231	1415	11403.6	17866.4	0.647764	4.37e-109	*	4.67e-112	AKR1B1	GO:0070062//extracellular vesicular exosome;GO:0005615//extracellular space;GO:0005654//nucleoplasm;GO:0097454//Schwann cell microvillus;GO:0043220//Schmidt-Lanterman incisure;GO:0042629//mast cell granule;GO:0032838//cell projection cytoplasm;GO:0048471//perinuclear region of cytoplasm;GO:0005829//cytosol;GO:0033010//paranodal junction	GO:0009055//electron carrier activity;GO:0004032//alditol:NADP+ 1-oxidoreductase activity;GO:0043795//glyceraldehyde oxidoreductase activity	GO:0044598//doxorubicin metabolic process;GO:0006700//C21-steroid hormone biosynthetic process;GO:0005975//carbohydrate metabolic process;GO:0006950//response to stress;GO:0044281//small molecule metabolic process;GO:0044597//daunorubicin metabolic process	K00011//aldehyde reductase [EC:1.1.1.21]	gi|530385669|ref|XP_005250291.1|//PREDICTED: aldose reductase isoform X1 [Homo sapiens];gi|358439789|pdb|3RX2|A//Chain A, Crystal Structure Of Human Aldose Reductase Complexed With Sulindac Sulfone
971	1767	2.71343	4.25051	0.64752	0.264512	*	0.114186	CD72	GO:0005887//integral component of plasma membrane	GO:0030246//carbohydrate binding;GO:0004888//transmembrane signaling receptor activity;GO:0005102//receptor binding	GO:0007155//cell adhesion;GO:0007411//axon guidance	K06504//CD72 antigen	gi|4502683|ref|NP_001773.1|//B-cell differentiation antigen CD72 [Homo sapiens];gi|578816792|ref|XP_006716957.1|//PREDICTED: B-cell differentiation antigen CD72 isoform X2 [Homo sapiens];gi|578816790|ref|XP_006716956.1|//PREDICTED: B-cell differentiation antigen CD72 isoform X1 [Homo sapiens];gi|76789920|gb|ABA55068.1|//CD72b [Homo sapiens]
9020	4499	200.982	314.6	0.646451	3.82e-07	*	3.44e-08	MAP3K14	GO:0005829//cytosol	GO:0004709//MAP kinase kinase kinase activity;GO:0004704//NF-kappaB-inducing kinase activity;GO:0005515//protein binding;GO:0005524//ATP binding	GO:0038061//NIK/NF-kappaB signaling;GO:0043123//positive regulation of I-kappaB kinase/NF-kappaB signaling;GO:0071260//cellular response to mechanical stimulus;GO:0006955//immune response;GO:0031295//T cell costimulation	K04466//mitogen-activated protein kinase kinase kinase 14 [EC:2.7.11.25]	gi|115298645|ref|NP_003945.2|//mitogen-activated protein kinase kinase kinase 14 [Homo sapiens]
140686	1000	15.6833	24.5475	0.64635	0.137862	*	0.0500005	WFDC3	GO:0005576//extracellular region	GO:0004867//serine-type endopeptidase inhibitor activity	NA	K12864//beta-catenin-like protein 1;K18740//exonuclease 3'-5' domain-containing protein 1;K06238//collagen, type VI, alpha	gi|768015962|ref|XP_011526863.1|//PREDICTED: WAP four-disulfide core domain protein 3 isoform X11 [Homo sapiens];gi|768015934|ref|XP_011526855.1|//PREDICTED: WAP four-disulfide core domain protein 3 isoform X4 [Homo sapiens]
9348	4714	3.1165	4.87439	0.645294	0.271476	*	0.118143	NDST3	GO:0016021//integral component of membrane;GO:0000139//Golgi membrane	GO:0016787//hydrolase activity;GO:0015016//[heparan sulfate]-glucosamine N-sulfotransferase activity	GO:0030210//heparin biosynthetic process;GO:0015012//heparan sulfate proteoglycan biosynthetic process	K02578//heparan sulfate N-deacetylase/N-sulfotransferase NDST3 [EC:3.1.1.- 2.8.2.-]	gi|5668903|gb|AAD46061.1|AF076605_1//heparan N-deacetylase/N-sulfotransferase 3 [Homo sapiens];gi|4758766|ref|NP_004775.1|//bifunctional heparan sulfate N-deacetylase/N-sulfotransferase 3 [Homo sapiens];gi|694908628|ref|XP_009446466.1|//PREDICTED: bifunctional heparan sulfate N-deacetylase/N-sulfotransferase 3 isoform X2 [Pan troglodytes];gi|767933067|ref|XP_011530718.1|//PREDICTED: bifunctional …
66002	1964	6.0971	9.52756	0.643983	0.267947	*	0.116084	CYP4F12	GO:0016324//apical plasma membrane;GO:0031090//organelle membrane;GO:0016021//integral component of membrane;GO:0005789//endoplasmic reticulum membrane	GO:0020037//heme binding;GO:0005506//iron ion binding;GO:0070330//aromatase activity;GO:0050051//leukotriene-B4 20-monooxygenase activity;GO:0019825//oxygen binding;GO:0008392//arachidonic acid epoxygenase activity;GO:0018685//alkane 1-monooxygenase activity	GO:0000038//very long-chain fatty acid metabolic process;GO:0003095//pressure natriuresis;GO:0030195//negative regulation of blood coagulation;GO:0036101//leukotriene B4 catabolic process;GO:0042371//vitamin K biosynthetic process;GO:0006805//xenobiotic metabolic process;GO:0017144//drug metabolic process;GO:0055114//oxidation-reduction process;GO:0042360//vitamin E metabolic process;GO:0003091//…	K17730//cytochrome P450, family 4, subfamily F, polypeptide 12 [EC:1.14.14.1]	gi|768003585|ref|XP_011526505.1|//PREDICTED: cytochrome P450 4F12 isoform X5 [Homo sapiens];gi|768003571|ref|XP_011526502.1|//PREDICTED: cytochrome P450 4F12 isoform X2 [Homo sapiens];gi|578833506|ref|XP_006722913.1|//PREDICTED: cytochrome P450 4F12 isoform X4 [Homo sapiens];gi|768003567|ref|XP_011526501.1|//PREDICTED: cytochrome P450 4F12 isoform X1 [Homo sapiens]
1593	2845	5.06495	7.90595	0.642391	0.277012	*	0.121391	CYP27A1	GO:0005759//mitochondrial matrix;GO:0005743//mitochondrial inner membrane	GO:0008395//steroid hydroxylase activity;GO:0016705//oxidoreductase activity, acting on paired donors, with incorporation or reduction of molecular oxygen;GO:0020037//heme binding;GO:0005506//iron ion binding	GO:0008203//cholesterol metabolic process;GO:0006805//xenobiotic metabolic process;GO:0006699//bile acid biosynthetic process	K00488//cholestanetriol 26-monooxygenase [EC:1.14.13.15]	gi|4503211|ref|NP_000775.1|//sterol 26-hydroxylase, mitochondrial precursor [Homo sapiens];gi|119591059|gb|EAW70653.1|//cytochrome P450, family 27, subfamily A, polypeptide 1, isoform CRA_a [Homo sapiens]
8682	2495	1644.16	2565.29	0.641771	5.58e-41	*	3.15e-43	PEA15	GO:0005875//microtubule associated complex;GO:0005829//cytosol;GO:0005737//cytoplasm	GO:0005515//protein binding	GO:0046325//negative regulation of glucose import;GO:0043278//response to morphine;GO:0043066//negative regulation of apoptotic process	K02373//FAS-associated death domain protein;K08770//ubiquitin C;K15604//protein lyl-1	gi|662033922|ref|NP_001284505.1|//astrocytic phosphoprotein PEA-15 isoform a [Homo sapiens];gi|744603535|ref|XP_010991404.1|//PREDICTED: astrocytic phosphoprotein PEA-15 [Camelus dromedarius];gi|537155462|gb|ERE72874.1|//astrocytic phosphoprotein PEA-15 [Cricetulus griseus]
4248	5406	41.0308	64.0051	0.641479	0.0252377	*	0.00675712	MGAT3	GO:0016021//integral component of membrane;GO:0000139//Golgi membrane	GO:0003830//beta-1,4-mannosylglycoprotein 4-beta-N-acetylglucosaminyltransferase activity	GO:0043687//post-translational protein modification;GO:0018279//protein N-linked glycosylation via asparagine	K00737//beta-1,4-mannosyl-glycoprotein beta-1,4-N-acetylglucosaminyltransferase [EC:2.4.1.144]	gi|530420097|ref|XP_005261665.1|//PREDICTED: beta-1,4-mannosyl-glycoprotein 4-beta-N-acetylglucosaminyltransferase isoform X2 [Homo sapiens]
84709	1339	2.98471	4.65266	0.640464	0.279221	*	0.122509	MGARP	GO:1904115//null;GO:0031307//integral component of mitochondrial outer membrane	GO:0005515//protein binding	GO:0071456//cellular response to hypoxia;GO:0097211//cellular response to gonadotropin-releasing hormone;GO:0006626//protein targeting to mitochondrion;GO:0008090//retrograde axon cargo transport;GO:0008089//anterograde axon cargo transport;GO:0071383//cellular response to steroid hormone stimulus;GO:0019896//axon transport of mitochondrion;GO:0010822//positive regulation of mitochondrion organiz…	K04727//programmed cell death 8 (apoptosis-inducing factor) [EC:1.-.-.-]	gi|117168279|ref|NP_116012.2|//protein MGARP [Homo sapiens]
6369	1425	11.0316	17.1901	0.639938	0.205731	*	0.0825113	CCL24	GO:0005615//extracellular space	GO:0008009//chemokine activity;GO:0048020//CCR chemokine receptor binding	GO:0048245//eosinophil chemotaxis;GO:0030335//positive regulation of cell migration;GO:0007267//cell-cell signaling;GO:0050729//positive regulation of inflammatory response;GO:0008360//regulation of cell shape;GO:0006955//immune response;GO:0001938//positive regulation of endothelial cell proliferation;GO:0045766//positive regulation of angiogenesis;GO:0030838//positive regulation of actin filame…	K21097//null	gi|22165427|ref|NP_002982.2|//C-C motif chemokine 24 precursor [Homo sapiens]
1479	1601	806.865	1256.51	0.639027	1.53e-23	*	2.35e-25	CSTF3	GO:0005654//nucleoplasm	GO:0003729//mRNA binding;GO:0005515//protein binding	GO:0000398//mRNA splicing, via spliceosome;GO:0006369//termination of RNA polymerase II transcription;GO:0006379//mRNA cleavage;GO:0006378//mRNA polyadenylation	K14408//cleavage stimulation factor subunit 3	gi|75709189|ref|NP_001028678.1|//cleavage stimulation factor subunit 3 isoform 3 [Homo sapiens] ;gi|75709187|ref|NP_001028677.1|//cleavage stimulation factor subunit 3 isoform 2 [Homo sapiens];gi|4557495|ref|NP_001317.1|//cleavage stimulation factor subunit 3 isoform 1 [Homo sapiens]
137994	2537	70.6894	110.042	0.63849	0.00430038	*	0.000910073	LETM2	GO:0005743//mitochondrial inner membrane;GO:0016021//integral component of membrane	GO:0043022//ribosome binding	NA	K17800//LETM1 and EF-hand domain-containing protein 1, mitochondrial	gi|558472790|ref|NP_001273750.1|//LETM1 domain-containing protein LETM2, mitochondrial isoform 5 [Homo sapiens] ;gi|767950579|ref|XP_011542710.1|//PREDICTED: LETM1 domain-containing protein LETM2, mitochondrial isoform X3 [Homo sapiens];gi|71052104|gb|AAH29541.2|//LETM2 protein [Homo sapiens];gi|767950581|ref|XP_011542711.1|//PREDICTED: LETM1 domain-containing protein LETM2, mitochondrial isoform…
27151	8189	15.3379	23.8706	0.63813	0.15168	*	0.0560749	CPAMD8	GO:0005615//extracellular space;GO:0005886//plasma membrane	GO:0004867//serine-type endopeptidase inhibitor activity	NA	K06530//CD109 antigen;K03910//alpha-2-macroglobulin	gi|259016204|sp|Q8IZJ3.2|CPMD8_HUMAN//RecName: Full=C3 and PZP-like alpha-2-macroglobulin domain-containing protein 8; Flags: Precursor;gi|118600977|ref|NP_056507.2|//C3 and PZP-like alpha-2-macroglobulin domain-containing protein 8 [Homo sapiens];gi|768001962|ref|XP_011526221.1|//PREDICTED: C3 and PZP-like alpha-2-macroglobulin domain-containing protein 8 isoform X3 [Homo sapiens];gi|768001956|r…
84002	4176	208.158	323.938	0.638039	1.54e-07	*	1.3e-08	B3GNT5	GO:0016021//integral component of membrane;GO:0000139//Golgi membrane	GO:0008499//UDP-galactose:beta-N-acetylglucosamine beta-1,3-galactosyltransferase activity;GO:0047256//lactosylceramide 1,3-N-acetyl-beta-D-glucosaminyltransferase activity;GO:0008457//beta-galactosyl-N-acetylglucosaminylgalactosylglucosyl-ceramide beta-1,3-acetylglucosaminyltransferase activity	GO:0043687//post-translational protein modification;GO:0009247//glycolipid biosynthetic process;GO:0007417//central nervous system development;GO:0016266//O-glycan processing	K03766//beta-1,3-N-acetylglucosaminyltransferase 5 [EC:2.4.1.206]	gi|14042986|ref|NP_114436.1|//lactosylceramide 1,3-N-acetyl-beta-D-glucosaminyltransferase [Homo sapiens]
54957	2231	405.775	630.687	0.636244	1.11e-12	*	4.75e-14	TXNL4B	GO:0005681//spliceosomal complex;GO:0005682//U5 snRNP;GO:0046540//U4/U6 x U5 tri-snRNP complex	GO:0005515//protein binding	GO:0006397//mRNA processing;GO:0008380//RNA splicing	K12859//U5 snRNP protein, DIM1 family	gi|694964607|ref|XP_009429496.1|//PREDICTED: thioredoxin-like protein 4B isoform X2 [Pan troglodytes];gi|460417618|pdb|4IN0|A//Chain A, Crystal Structure Of Human Splicing Factor Dim2/txnl4b;gi|8923475|ref|NP_060323.1|//thioredoxin-like protein 4B [Homo sapiens];gi|675792546|ref|XP_008953116.1|//PREDICTED: thioredoxin-like protein 4B isoform X2 [Pan paniscus]
401137	4814	1.69367	2.63185	0.635926	0.228962	*	0.0948149	PRR27	GO:0070062//extracellular vesicular exosome	NA	NA	NA	gi|156071476|ref|NP_999876.2|//proline-rich protein 27 precursor [Homo sapiens]
3384	1229	66.2614	102.904	0.635065	0.00344058	*	0.000708097	ICAM2	GO:0070062//extracellular vesicular exosome;GO:0005887//integral component of plasma membrane;GO:0001931//uropod	GO:0005178//integrin binding	GO:0050776//regulation of immune response	K06523//intercellular adhesion molecule 2	gi|153082686|ref|NP_001093256.1|//intercellular adhesion molecule 2 precursor [Homo sapiens]
26061	2277	913.568	1417.41	0.633674	1.41e-24	*	1.95e-26	HACL1	GO:0005782//peroxisomal matrix	GO:0000287//magnesium ion binding;GO:0042802//identical protein binding;GO:0005102//receptor binding;GO:0016830//carbon-carbon lyase activity;GO:0030976//thiamine pyrophosphate binding	GO:0001561//fatty acid alpha-oxidation;GO:0051259//protein oligomerization	K12261//2-hydroxyacyl-CoA lyase 1 [EC:4.1.-.-]	gi|548923675|ref|NP_001271345.1|//2-hydroxyacyl-CoA lyase 1 isoform d [Homo sapiens] ;gi|548923731|ref|NP_001271342.1|//2-hydroxyacyl-CoA lyase 1 isoform b [Homo sapiens] ;gi|93004078|ref|NP_036392.2|//2-hydroxyacyl-CoA lyase 1 isoform a [Homo sapiens];gi|548923681|ref|NP_001271344.1|//2-hydroxyacyl-CoA lyase 1 isoform c [Homo sapiens]
9404	2190	48.9677	75.9552	0.63332	0.0153218	*	0.00380642	LPXN	GO:0005634//nucleus;GO:0042995//cell projection;GO:0005925//focal adhesion;GO:0002102//podosome;GO:0005737//cytoplasm;GO:0005886//plasma membrane;GO:0048471//perinuclear region of cytoplasm	GO:0005515//protein binding;GO:0003712//transcription cofactor activity;GO:0008270//zinc ion binding	GO:0033628//regulation of cell adhesion mediated by integrin;GO:0006355//regulation of transcription, DNA-templated;GO:0007162//negative regulation of cell adhesion;GO:0050859//negative regulation of B cell receptor signaling pathway;GO:0006461//protein complex assembly	K05760//paxillin	gi|4758670|ref|NP_004802.1|//leupaxin isoform 2 [Homo sapiens];gi|808154257|ref|NP_001294880.1|//leupaxin isoform 3 [Homo sapiens] ;gi|221316659|ref|NP_001137467.1|//leupaxin isoform 1 [Homo sapiens] ;gi|767969110|ref|XP_011543695.1|//PREDICTED: leupaxin isoform X3 [Homo sapiens];gi|767969112|ref|XP_011543696.1|//PREDICTED: leupaxin isoform X4 [Homo sapiens]
222487	2676	33.3808	51.7681	0.633046	0.0459892	*	0.0136785	ADGRG3	GO:0016021//integral component of membrane;GO:0005886//plasma membrane	GO:0004930//G-protein coupled receptor activity	GO:0007218//neuropeptide signaling pathway	K08452//G protein-coupled receptor 97	gi|229093087|ref|NP_740746.4|//adhesion G protein-coupled receptor G3 isoform 1 precursor [Homo sapiens];gi|767989607|ref|XP_011521256.1|//PREDICTED: probable G-protein coupled receptor 97 isoform X5 [Homo sapiens];gi|767989605|ref|XP_011521255.1|//PREDICTED: probable G-protein coupled receptor 97 isoform X4 [Homo sapiens];gi|530423679|ref|XP_005255899.1|//PREDICTED: probable G-protein coupled re…
257169	1948	11.3312	17.5617	0.63214	0.205588	*	0.0824096	C9orf43	NA	GO:0005515//protein binding	NA	K07524//regulator of G-protein signalling 3	gi|22749539|ref|NP_689999.1|//uncharacterized protein C9orf43 isoform 1 [Homo sapiens];gi|520262506|ref|NP_001265559.1|//uncharacterized protein C9orf43 isoform 2 [Homo sapiens];gi|530390903|ref|XP_005251942.1|//PREDICTED: uncharacterized protein C9orf43 isoform X3 [Homo sapiens];gi|767956888|ref|XP_011516779.1|//PREDICTED: uncharacterized protein C9orf43 isoform X1 [Homo sapiens]
26648	1020	22.2929	34.5494	0.632074	0.0898696	*	0.0300383	OR7E24	GO:0016021//integral component of membrane;GO:0005886//plasma membrane	GO:0004984//olfactory receptor activity;GO:0004930//G-protein coupled receptor activity	NA	K04257//olfactory receptor	gi|121247395|ref|NP_001073404.1|//olfactory receptor 7E24 [Homo sapiens]
80004	3301	1.69932	2.63117	0.630747	0.232622	*	0.0967203	ESRP2	GO:0005654//nucleoplasm	GO:0003729//mRNA binding;GO:0000166//nucleotide binding	GO:0006397//mRNA processing;GO:0043484//regulation of RNA splicing	K14947//epithelial splicing regulatory protein 1/2	gi|45935393|ref|NP_079215.2|//epithelial splicing regulatory protein 2 [Homo sapiens];gi|578829205|ref|XP_006721336.1|//PREDICTED: epithelial splicing regulatory protein 2 isoform X2 [Homo sapiens]
163747	1719	1.30285	2.01659	0.630243	0.202259	*	0.0807188	LEXM	GO:0005761//mitochondrial ribosome	NA	NA	NA	gi|160358340|ref|NP_001104003.1|//uncharacterized protein C1orf177 isoform 2 [Homo sapiens];gi|767902741|ref|XP_011539144.1|//PREDICTED: uncharacterized protein C1orf177 isoform X1 [Homo sapiens];gi|160358338|ref|NP_689820.2|//uncharacterized protein C1orf177 isoform 1 [Homo sapiens]
8840	5139	9.64654	14.9241	0.629564	0.228719	*	0.0946819	WISP1	GO:0005615//extracellular space;GO:0005737//cytoplasm;GO:0005578//proteinaceous extracellular matrix	GO:0005520//insulin-like growth factor binding;GO:0005178//integrin binding;GO:0008201//heparin binding	GO:0001558//regulation of cell growth;GO:0007155//cell adhesion;GO:0007267//cell-cell signaling;GO:0016055//Wnt signaling pathway	K06829//cysteine rich protein 61;K06827//connective tissue growth factor	gi|325910845|ref|NP_001191799.1|//WNT1-inducible-signaling pathway protein 1 isoform 4 precursor [Homo sapiens];gi|18491000|ref|NP_543028.1|//WNT1-inducible-signaling pathway protein 1 isoform 2 precursor [Homo sapiens];gi|4507921|ref|NP_003873.1|//WNT1-inducible-signaling pathway protein 1 isoform 1 precursor [Homo sapiens];gi|325910843|ref|NP_001191798.1|//WNT1-inducible-signaling pathway prote…
284402	3258	1.43301	2.21501	0.628263	0.197492	*	0.0785231	SCGB2B2	GO:0005576//extracellular region	NA	NA	NA	gi|70980552|ref|NP_001020762.1|//secretoglobin family 2B member 2 precursor [Homo sapiens]
100885848	1995	61.7238	95.3995	0.628155	0.012267	*	0.00297187	PTGES3L	GO:0005634//nucleus;GO:0005737//cytoplasm	GO:0046872//metal ion binding;GO:0005515//protein binding;GO:0005524//ATP binding;GO:0000049//tRNA binding;GO:0002196//Ser-tRNA(Ala) hydrolase activity;GO:0004813//alanine-tRNA ligase activity	GO:0006419//alanyl-tRNA aminoacylation	K07050//misacylated tRNA(Ala) deacylase [EC:3.1.1.-]	gi|119581309|gb|EAW60905.1|//alanyl-tRNA synthetase domain containing 1, isoform CRA_c [Homo sapiens];gi|217416405|ref|NP_001136125.1|//putative protein PTGES3L isoform 3 [Homo sapiens];gi|217416407|ref|NP_001136126.1|//putative protein PTGES3L isoform 4 [Homo sapiens]
3475	2419	1019.87	1576.19	0.628056	1.17e-26	*	1.33e-28	IFRD1	GO:0005634//nucleus;GO:0005737//cytoplasm	NA	GO:0007275//multicellular organismal development;GO:0007527//adult somatic muscle development;GO:0007518//myoblast fate determination	K13855//solute carrier family 4 (anion exchanger), member 2	gi|55953129|ref|NP_001541.2|//interferon-related developmental regulator 1 isoform 1 [Homo sapiens];gi|767947646|ref|XP_011514444.1|//PREDICTED: interferon-related developmental regulator 1 isoform X1 [Homo sapiens]
5270	2095	2348.11	3628.12	0.627723	4.27e-57	*	1.6e-59	SERPINE2	GO:0031012//extracellular matrix;GO:0005615//extracellular space;GO:0031091//platelet alpha granule;GO:0005829//cytosol;GO:0031232//extrinsic component of external side of plasma membrane;GO:0031594//neuromuscular junction;GO:1903561//extracellular vesicle;GO:0043025//neuronal cell body	GO:0004867//serine-type endopeptidase inhibitor activity;GO:0008201//heparin binding;GO:0005102//receptor binding	GO:0010951//negative regulation of endopeptidase activity;GO:0045861//negative regulation of proteolysis;GO:0021683//cerebellar granular layer morphogenesis;GO:0042177//negative regulation of protein catabolic process;GO:0045879//negative regulation of smoothened signaling pathway;GO:0010544//negative regulation of platelet activation;GO:0030334//regulation of cell migration;GO:0010766//negative …	K16643//glia-derived nexin	gi|332815503|ref|XP_001167141.2|//PREDICTED: glia-derived nexin isoform X1 [Pan troglodytes];gi|530370527|ref|XP_005246698.1|//PREDICTED: glia-derived nexin isoform X2 [Homo sapiens];gi|211904156|ref|NP_001130002.1|//glia-derived nexin isoform c precursor [Homo sapiens]
1969	3851	1127.99	1741.91	0.626919	4.6e-26	*	5.6e-28	EPHA2	GO:0031258//lamellipodium membrane;GO:0009986//cell surface;GO:0005887//integral component of plasma membrane;GO:0005925//focal adhesion;GO:0005622//intracellular;GO:0032587//ruffle membrane	GO:0005515//protein binding;GO:0005524//ATP binding;GO:0005003//ephrin receptor activity	GO:0001649//osteoblast differentiation;GO:0030216//keratinocyte differentiation;GO:0030316//osteoclast differentiation;GO:0060444//branching involved in mammary gland duct morphogenesis;GO:0014028//notochord formation;GO:0036342//post-anal tail morphogenesis;GO:0010591//regulation of lamellipodium assembly;GO:0033628//regulation of cell adhesion mediated by integrin;GO:0060326//cell chemotaxis;GO…	K05103//Eph receptor A2 [EC:2.7.10.1]	gi|32967311|ref|NP_004422.2|//ephrin type-A receptor 2 precursor [Homo sapiens]
57124	2576	1182	1824.11	0.625963	1.54e-25	*	1.96e-27	CD248	GO:0070062//extracellular vesicular exosome;GO:0016021//integral component of membrane;GO:0005737//cytoplasm;GO:0005578//proteinaceous extracellular matrix	GO:0030246//carbohydrate binding;GO:0005509//calcium ion binding;GO:0050840//extracellular matrix binding	NA	K06706//CD248 antigen, endosialin	gi|9966885|ref|NP_065137.1|//endosialin precursor [Homo sapiens]
9914	4198	4.30774	6.64637	0.625636	0.298441	*	0.133457	ATP2C2	GO:0005887//integral component of plasma membrane;GO:0031410//cytoplasmic vesicle;GO:0009898//cytoplasmic side of plasma membrane;GO:0000139//Golgi membrane;GO:0048471//perinuclear region of cytoplasm	GO:0046872//metal ion binding;GO:0005515//protein binding;GO:0005524//ATP binding;GO:0005388//calcium-transporting ATPase activity;GO:0015410//manganese-transporting ATPase activity	GO:0034220//ion transmembrane transport	K01537//Ca2+-transporting ATPase [EC:3.6.3.8]	gi|612339339|ref|NP_001278383.1|//calcium-transporting ATPase type 2C member 2 isoform 3 [Homo sapiens];gi|767990945|ref|XP_011521788.1|//PREDICTED: calcium-transporting ATPase type 2C member 2 isoform X1 [Homo sapiens];gi|612339313|ref|NP_001273456.2|//calcium-transporting ATPase type 2C member 2 isoform 1 [Homo sapiens];gi|612339337|ref|NP_055676.3|//calcium-transporting ATPase type 2C member 2…
55277	1845	130.877	201.856	0.625112	4.92e-05	*	6.54e-06	FGGY	GO:0005623//cell;GO:0005737//cytoplasm	GO:0016301//kinase activity;GO:0016773//phosphotransferase activity, alcohol group as acceptor	GO:0070050//neuron cellular homeostasis;GO:0005975//carbohydrate metabolic process;GO:0008219//cell death	K00864//glycerol kinase [EC:2.7.1.30];K19583//putative glycerol kinase 5 [EC:2.7.1.30]	gi|347659034|ref|NP_001231643.1|//FGGY carbohydrate kinase domain-containing protein isoform c [Homo sapiens] ;gi|675778318|ref|XP_008976227.1|//PREDICTED: FGGY carbohydrate kinase domain-containing protein isoform X7 [Pan paniscus];gi|767905029|ref|XP_011540040.1|//PREDICTED: FGGY carbohydrate kinase domain-containing protein isoform X8 [Homo sapiens];gi|767905023|ref|XP_011540038.1|//PREDICTED:…
6279	474	8.3596	12.8878	0.6245	0.257733	*	0.110494	S100A8	GO:0005856//cytoskeleton;GO:0070062//extracellular vesicular exosome;GO:0005615//extracellular space;GO:0005634//nucleus;GO:0005829//cytosol;GO:0005886//plasma membrane	GO:0005509//calcium ion binding;GO:0050786//RAGE receptor binding;GO:0008270//zinc ion binding;GO:0035662//Toll-like receptor 4 binding;GO:0008017//microtubule binding;GO:0050544//arachidonic acid binding	GO:0030307//positive regulation of cell growth;GO:0032496//response to lipopolysaccharide;GO:0042742//defense response to bacterium;GO:0050729//positive regulation of inflammatory response;GO:0032119//sequestering of zinc ion;GO:0045471//response to ethanol;GO:0002523//leukocyte migration involved in inflammatory response;GO:0006914//autophagy;GO:0045087//innate immune response;GO:0050832//defens…	K21127//null	gi|984290538|ref|NP_001306125.1|//protein S100-A8 isoform a [Homo sapiens];gi|984290542|ref|NP_001306127.1|//protein S100-A8 isoform c [Homo sapiens];gi|21614544|ref|NP_002955.2|//protein S100-A8 isoform d [Homo sapiens];gi|984290540|ref|NP_001306126.1|//protein S100-A8 isoform b [Homo sapiens]
534	1449	7.57065	11.6601	0.623092	0.286392	*	0.12693	ATP6V1G2	GO:0005654//nucleoplasm;GO:0005681//spliceosomal complex;GO:0005688//U6 snRNP;GO:0005829//cytosol;GO:0030285//integral component of synaptic vesicle membrane;GO:0042470//melanosome;GO:0005687//U4 snRNP;GO:0005886//plasma membrane;GO:0016471//vacuolar proton-transporting V-type ATPase complex;GO:0000346//transcription export complex	GO:0004004//ATP-dependent RNA helicase activity;GO:0005524//ATP binding;GO:0008553//hydrogen-exporting ATPase activity, phosphorylative mechanism;GO:0043008//ATP-dependent protein binding;GO:0017070//U6 snRNA binding;GO:0030621//U4 snRNA binding	GO:0006879//cellular iron ion homeostasis;GO:0055085//transmembrane transport;GO:0090382//phagosome maturation;GO:0008286//insulin receptor signaling pathway;GO:0033572//transferrin transport;GO:0051701//interaction with host;GO:0015992//proton transport	K02152//V-type H+-transporting ATPase subunit G	gi|323276655|ref|NP_001191007.1|//V-type proton ATPase subunit G 2 isoform c [Homo sapiens] ;gi|18497300|ref|NP_569730.1|//V-type proton ATPase subunit G 2 isoform a [Homo sapiens]
56265	2187	1.30688	2.01053	0.621449	0.208029	*	0.0836265	CPXM1	GO:0005615//extracellular space	GO:0004185//serine-type carboxypeptidase activity;GO:0004181//metallocarboxypeptidase activity;GO:0008270//zinc ion binding	GO:0007155//cell adhesion;GO:0006508//proteolysis	K08638//carboxypeptidase X1 [EC:3.4.17.-]	gi|296040431|ref|NP_001171628.1|//probable carboxypeptidase X1 isoform 2 precursor [Homo sapiens];gi|9994201|ref|NP_062555.1|//probable carboxypeptidase X1 isoform 1 precursor [Homo sapiens]
105379045	6657	19.6515	30.2223	0.620971	0.124182	*	0.0439921	LOC105379045	NA	NA	NA	NA	gi|767884676|ref|XP_011547304.1|//PREDICTED: uncharacterized protein LOC105379045 [Homo sapiens]
301	1517	4227.94	6500.41	0.620576	6.86e-71	*	1.79e-73	ANXA1	GO:0016323//basolateral plasma membrane;GO:0005615//extracellular space;GO:0016324//apical plasma membrane;GO:0031232//extrinsic component of external side of plasma membrane;GO:0031514//motile cilium;GO:0016328//lateral plasma membrane;GO:0030659//cytoplasmic vesicle membrane;GO:0070062//extracellular vesicular exosome;GO:0005654//nucleoplasm;GO:0005925//focal adhesion;GO:0001533//cornified enve…	GO:0019834//phospholipase A2 inhibitor activity;GO:0005544//calcium-dependent phospholipid binding;GO:0030674//protein binding, bridging;GO:0004386//helicase activity;GO:0005102//receptor binding;GO:0033676//double-stranded DNA-dependent ATPase activity;GO:0042803//protein homodimerization activity;GO:0036310//annealing helicase activity;GO:0003697//single-stranded DNA binding;GO:0005509//calcium…	GO:0050709//negative regulation of protein secretion;GO:0030216//keratinocyte differentiation;GO:0031340//positive regulation of vesicle fusion;GO:0042127//regulation of cell proliferation;GO:0071385//cellular response to glucocorticoid stimulus;GO:0007166//cell surface receptor signaling pathway;GO:0030073//insulin secretion;GO:0033031//positive regulation of neutrophil apoptotic process;GO:0018…	K17091//annexin A1	gi|119582952|gb|EAW62548.1|//annexin A1, isoform CRA_c [Homo sapiens];gi|4502101|ref|NP_000691.1|//annexin A1 [Homo sapiens]
285613	2336	54.9538	84.3433	0.618055	0.0109215	*	0.00259985	RELL2	GO:0016021//integral component of membrane;GO:0005886//plasma membrane;GO:0005604//basement membrane	GO:0005518//collagen binding	GO:0010811//positive regulation of cell-substrate adhesion	K05156//tumor necrosis factor receptor superfamily member 19-like	gi|530380484|ref|XP_005268471.1|//PREDICTED: RELT-like protein 2 isoform X1 [Homo sapiens];gi|767937701|ref|XP_011535927.1|//PREDICTED: RELT-like protein 2 isoform X2 [Homo sapiens];gi|194097446|ref|NP_776189.3|//RELT-like protein 2 [Homo sapiens]
107983998	1488	6.94631	10.6574	0.617534	0.276614	*	0.121168	LOC107983998	NA	NA	NA	NA	gi|767899808|ref|XP_011507169.1|//PREDICTED: zinc finger protein 580 isoform X2 [Homo sapiens];gi|768009487|ref|XP_011525320.1|//PREDICTED: zinc finger protein 580 isoform X3 [Homo sapiens]
566	936	1.97002	3.02214	0.617359	0.270075	*	0.117261	AZU1	GO:0070062//extracellular vesicular exosome;GO:0005615//extracellular space;GO:0019898//extrinsic component of membrane;GO:0035577//azurophil granule membrane	GO:0004252//serine-type endopeptidase activity;GO:0043395//heparan sulfate proteoglycan binding;GO:0005515//protein binding;GO:0015643//toxic substance binding;GO:0008201//heparin binding	GO:0007205//protein kinase C-activating G-protein coupled receptor signaling pathway;GO:0050829//defense response to Gram-negative bacterium;GO:0050930//induction of positive chemotaxis;GO:0045785//positive regulation of cell adhesion;GO:0043114//regulation of vascular permeability;GO:0050766//positive regulation of phagocytosis;GO:0050725//positive regulation of interleukin-1 beta biosynthetic p…	K01327//leukocyte elastase [EC:3.4.21.37];K01350//myeloblastin [EC:3.4.21.76]	gi|11342670|ref|NP_001691.1|//azurocidin preproprotein [Homo sapiens]
80315	7745	306.666	470.282	0.61686	1.01e-09	*	6.14e-11	CPEB4	GO:0030425//dendrite;GO:0005634//nucleus;GO:0005783//endoplasmic reticulum;GO:0014069//postsynaptic density;GO:1990124//messenger ribonucleoprotein complex	GO:0043022//ribosome binding;GO:0000900//translation repressor activity, nucleic acid binding;GO:0008135//translation factor activity, nucleic acid binding;GO:0005515//protein binding;GO:0000166//nucleotide binding;GO:0003730//mRNA 3'-UTR binding	NA	K02602//cytoplasmic polyadenylation element-binding protein	gi|767938656|ref|XP_011532963.1|//PREDICTED: cytoplasmic polyadenylation element-binding protein 4 isoform X5 [Homo sapiens];gi|189027090|ref|NP_085130.2|//cytoplasmic polyadenylation element-binding protein 4 isoform a [Homo sapiens];gi|815891022|ref|NP_001295118.1|//cytoplasmic polyadenylation element-binding protein 4 isoform b [Homo sapiens];gi|114603431|ref|XP_001155372.1|//PREDICTED: cytopl…
728262	1795	11.2847	17.3051	0.616829	0.215032	*	0.087489	FAM157A	NA	NA	NA	NA	gi|223646109|ref|NP_001138720.1|//putative protein FAM157A [Homo sapiens]
7439	3448	17.3136	26.5411	0.616317	0.15266	*	0.0565497	BEST1	GO:0016323//basolateral plasma membrane;GO:0005887//integral component of plasma membrane;GO:0005829//cytosol;GO:0034707//chloride channel complex	GO:0005229//intracellular calcium activated chloride channel activity;GO:0015106//bicarbonate transmembrane transporter activity	GO:0030321//transepithelial chloride transport;GO:0051924//regulation of calcium ion transport;GO:0050908//detection of light stimulus involved in visual perception	K13878//bestrophin-1	gi|119594393|gb|EAW73987.1|//vitelliform macular dystrophy 2 (Best disease, bestrophin), isoform CRA_f [Homo sapiens];gi|530397237|ref|XP_005274276.1|//PREDICTED: bestrophin-1 isoform X9 [Homo sapiens];gi|530397241|ref|XP_005274278.1|//PREDICTED: bestrophin-1 isoform X10 [Homo sapiens];gi|663856447|ref|NP_001287715.1|//bestrophin-1 isoform 3 [Homo sapiens];gi|767968688|ref|XP_011543532.1|//PREDIC…
402573	1020	14.3011	21.9188	0.616042	0.18139	*	0.0704513	C7orf61	GO:0005634//nucleus	NA	NA	NA	gi|51972226|ref|NP_001004323.1|//uncharacterized protein C7orf61 [Homo sapiens]
57761	2265	1081.7	1657.32	0.615553	2.67e-24	*	3.88e-26	TRIB3	GO:0005654//nucleoplasm;GO:0031965//nuclear membrane;GO:0005730//nucleolus;GO:0005829//cytosol;GO:0005886//plasma membrane	GO:0031434//mitogen-activated protein kinase kinase binding;GO:0003714//transcription corepressor activity;GO:0004860//protein kinase inhibitor activity;GO:0005524//ATP binding;GO:0004672//protein kinase activity;GO:0031625//ubiquitin protein ligase binding;GO:0055106//ubiquitin-protein transferase regulator activity	GO:0045892//negative regulation of transcription, DNA-templated;GO:0008286//insulin receptor signaling pathway;GO:0048011//neurotrophin TRK receptor signaling pathway;GO:0045599//negative regulation of fat cell differentiation;GO:0043405//regulation of MAP kinase activity;GO:0032092//positive regulation of protein binding;GO:0051443//positive regulation of ubiquitin-protein transferase activity;G…	K19518//tribbles homolog 3	gi|668259520|ref|NP_001288130.1|//tribbles homolog 3 isoform 2 [Homo sapiens]
4066	2341	2.36404	3.62096	0.615117	0.283583	*	0.125163	LYL1	GO:0005634//nucleus	GO:0000981//sequence-specific DNA binding RNA polymerase II transcription factor activity;GO:0000977//RNA polymerase II regulatory region sequence-specific DNA binding;GO:0046983//protein dimerization activity	GO:0060216//definitive hemopoiesis;GO:0030183//B cell differentiation;GO:0001955//blood vessel maturation;GO:0045893//positive regulation of transcription, DNA-templated	K15604//protein lyl-1	gi|578833262|ref|XP_006722816.1|//PREDICTED: protein lyl-1 isoform X3 [Homo sapiens];gi|578833260|ref|XP_006722815.1|//PREDICTED: protein lyl-1 isoform X2 [Homo sapiens]
651746	9052	199.427	305.329	0.614506	1.17e-06	*	1.15e-07	ANKRD33B	NA	NA	NA	K10661//E3 ubiquitin-protein ligase MARCH6 [EC:2.3.2.27];K12460//ankyrin repeat-rich membrane spanning protein	gi|256574784|ref|NP_001157912.1|//ankyrin repeat domain-containing protein 33B [Homo sapiens]
107985199	890	1.04697	1.60216	0.613789	0.159704	*	0.0597715	LOC107985199	NA	NA	NA	NA	gi|821033831|ref|XP_012353693.1|//PREDICTED: LOW QUALITY PROTEIN: uncharacterized protein LOC101177595 [Nomascus leucogenys]
5003	2050	13.6658	20.9096	0.613601	0.196825	*	0.0781996	SLC22A18AS	NA	NA	NA	NA	gi|198041703|ref|NP_009036.2|//beckwith-Wiedemann syndrome chromosomal region 1 candidate gene B protein isoform a [Homo sapiens];gi|724470699|ref|NP_001289791.1|//beckwith-Wiedemann syndrome chromosomal region 1 candidate gene B protein isoform b [Homo sapiens]
64409	2532	1.96568	3.00672	0.613165	0.272463	*	0.118848	WBSCR17	GO:0016021//integral component of membrane;GO:0000139//Golgi membrane	GO:0004653//polypeptide N-acetylgalactosaminyltransferase activity;GO:0030246//carbohydrate binding;GO:0046872//metal ion binding	GO:0006486//protein glycosylation	K00710//polypeptide N-acetylgalactosaminyltransferase [EC:2.4.1.41]	gi|767948454|ref|XP_011514771.1|//PREDICTED: putative polypeptide N-acetylgalactosaminyltransferase-like protein 3 isoform X3 [Homo sapiens];gi|767948450|ref|XP_011514769.1|//PREDICTED: putative polypeptide N-acetylgalactosaminyltransferase-like protein 3 isoform X1 [Homo sapiens];gi|45767744|gb|AAH67524.1|//Williams Beuren syndrome chromosome region 17 [Homo sapiens];gi|47682742|gb|AAH69997.1|//…
4783	2030	487.493	745.53	0.612883	9.51e-12	*	4.48e-13	NFIL3	GO:0005634//nucleus	GO:0000979//RNA polymerase II core promoter sequence-specific DNA binding;GO:0003714//transcription corepressor activity;GO:0005515//protein binding;GO:0001078//RNA polymerase II core promoter proximal region sequence-specific DNA binding transcription factor activity involved in negative regulation of transcription	GO:0000122//negative regulation of transcription from RNA polymerase II promoter;GO:0007623//circadian rhythm;GO:0006955//immune response;GO:0010628//positive regulation of gene expression	K09059//nuclear factor, interleukin 3 regulated	gi|52630429|ref|NP_005375.2|//nuclear factor interleukin-3-regulated protein [Homo sapiens]
26231	1482	14.3081	21.8801	0.612791	0.189381	*	0.0745784	LRRC29	NA	GO:0005515//protein binding	NA	K10275//F-box and leucine-rich repeat protein 9	gi|16306591|ref|NP_036295.1|//leucine-rich repeat-containing protein 29 [Homo sapiens];gi|767989712|ref|XP_011521295.1|//PREDICTED: leucine-rich repeat-containing protein 29 isoform X2 [Homo sapiens]
146429	1860	0.918828	1.40459	0.612281	0.162063	*	0.0610492	SLC22A31	GO:0005887//integral component of plasma membrane	GO:0008514//organic anion transmembrane transporter activity	NA	K08213//MFS transporter, OCT family, solute carrier family 22 (organic cation transporter), member 17	gi|337756639|ref|NP_001229686.1|//putative solute carrier family 22 member 31 [Homo sapiens];gi|675682527|ref|XP_008972998.1|//PREDICTED: putative solute carrier family 22 member 31 isoform X1 [Pan paniscus];gi|767989464|ref|XP_011521200.1|//PREDICTED: putative solute carrier family 22 member 31 isoform X3 [Homo sapiens]
11151	1825	13.0248	19.9107	0.612276	0.209241	*	0.0843623	CORO1A	GO:0030424//axon;GO:0070062//extracellular vesicular exosome;GO:0005634//nucleus;GO:0030670//phagocytic vesicle membrane;GO:0001772//immunological synapse;GO:0001891//phagocytic cup;GO:0030027//lamellipodium;GO:0005884//actin filament;GO:0030864//cortical actin cytoskeleton;GO:0005829//cytosol;GO:0043234//protein complex;GO:0005911//cell-cell junction;GO:0005769//early endosome	GO:0043548//phosphatidylinositol 3-kinase binding;GO:0051015//actin filament binding;GO:0008022//protein C-terminus binding;GO:0003785//actin monomer binding;GO:0032036//myosin heavy chain binding;GO:0042803//protein homodimerization activity	GO:0032796//uropod organization;GO:0030335//positive regulation of cell migration;GO:0030595//leukocyte chemotaxis;GO:0034097//response to cytokine;GO:0042102//positive regulation of T cell proliferation;GO:0006816//calcium ion transport;GO:0031589//cell-substrate adhesion;GO:0048873//homeostasis of number of cells within a tissue;GO:0008360//regulation of cell shape;GO:0051126//negative regulati…	K13882//coronin-1A	gi|5902134|ref|NP_009005.1|//coronin-1A [Homo sapiens];gi|820975952|ref|XP_012360810.1|//PREDICTED: coronin-1A isoform X1 [Nomascus leucogenys]
283403	1292	1.05203	1.60817	0.612242	0.16042	*	0.0601633	C12orf80	NA	NA	NA	NA	gi|336594548|ref|NP_001229625.1|//uncharacterized protein LOC283403 [Homo sapiens]
54538	3138	13.9454	21.2942	0.610673	0.187494	*	0.0736014	ROBO4	GO:0070062//extracellular vesicular exosome;GO:0016021//integral component of membrane	GO:0004872//receptor activity	GO:0001525//angiogenesis;GO:0030154//cell differentiation;GO:0030336//negative regulation of cell migration	K06784//roundabout, axon guidance receptor 4	gi|17511435|ref|NP_061928.4|//roundabout homolog 4 isoform 1 precursor [Homo sapiens];gi|578822257|ref|XP_006718924.1|//PREDICTED: roundabout homolog 4 isoform X1 [Homo sapiens];gi|767970284|ref|XP_011541177.1|//PREDICTED: roundabout homolog 4 isoform X2 [Homo sapiens];gi|666637980|ref|NP_001288017.1|//roundabout homolog 4 isoform 2 [Homo sapiens]
22809	2146	215.181	328.308	0.6095	4.71e-07	*	4.31e-08	ATF5	GO:0005654//nucleoplasm;GO:0005667//transcription factor complex;GO:0005813//centrosome;GO:0005737//cytoplasm	GO:0015631//tubulin binding;GO:0001228//RNA polymerase II transcription regulatory region sequence-specific DNA binding transcription factor activity involved in positive regulation of transcription;GO:0003714//transcription corepressor activity;GO:0000977//RNA polymerase II regulatory region sequence-specific DNA binding;GO:0003682//chromatin binding;GO:0031072//heat shock protein binding;GO:001…	GO:0006357//regulation of transcription from RNA polymerase II promoter;GO:0048712//negative regulation of astrocyte differentiation;GO:0043066//negative regulation of apoptotic process	K09044//activating transcription factor 5	gi|12597625|ref|NP_036200.2|//cyclic AMP-dependent transcription factor ATF-5 [Homo sapiens]
348801	2233	76.6118	116.854	0.609067	0.00346735	*	0.000714223	LNP1	NA	NA	NA	NA	gi|146260273|ref|NP_001078920.1|//leukemia NUP98 fusion partner 1 [Homo sapiens]
113452	1069	263.35	401.654	0.60897	1.51e-08	*	1.11e-09	TMEM54	GO:0016021//integral component of membrane	NA	NA	NA	gi|15723380|ref|NP_277039.1|//transmembrane protein 54 [Homo sapiens];gi|530361674|ref|XP_005270465.1|//PREDICTED: transmembrane protein 54 isoform X1 [Homo sapiens]
6274	738	360.731	550.017	0.608553	6.97e-11	*	3.61e-12	S100A3	NA	NA	NA	K21128//null;K17274//calpactin-1 light chain	gi|821008363|ref|XP_012366969.1|//PREDICTED: protein S100-A3 isoform X1 [Nomascus leucogenys]
56833	2664	1.84035	2.80525	0.608152	0.241049	*	0.101323	SLAMF8	GO:0016021//integral component of membrane	NA	NA	K16853//SLAM family member 8	gi|767909912|ref|XP_011508079.1|//PREDICTED: SLAM family member 8 isoform X4 [Homo sapiens];gi|9910342|ref|NP_064510.1|//SLAM family member 8 precursor [Homo sapiens];gi|530365088|ref|XP_005245402.1|//PREDICTED: SLAM family member 8 isoform X3 [Homo sapiens]
56892	1841	276.064	420.265	0.606295	1.04e-08	*	7.47e-10	C8orf4	GO:0005730//nucleolus;GO:0016607//nuclear speck;GO:0005737//cytoplasm	GO:0005112//Notch binding	GO:0006915//apoptotic process	NA	gi|9910148|ref|NP_064515.1|//protein C8orf4 [Homo sapiens]
101929355	5446	1.97804	3.01079	0.606066	0.278573	*	0.122191	LOC101929355	NA	NA	NA	K17095//annexin A7/11;K03353//anaphase-promoting complex subunit 6;K01294//carboxypeptidase E [EC:3.4.17.10];K10590//E3 ubiquitin-protein ligase TRIP12 [EC:2.3.2.26];K17094//annexin A6	gi|578825399|ref|XP_006720062.1|//PREDICTED: uncharacterized protein C17orf105-like [Homo sapiens]
51076	1378	560.433	852.78	0.605631	1.22e-15	*	3.81e-17	CUTC	GO:0005730//nucleolus;GO:0005737//cytoplasm	GO:0005515//protein binding;GO:0005507//copper ion binding	GO:0055070//copper ion homeostasis;GO:0051262//protein tetramerization;GO:0006825//copper ion transport	K06201//copper homeostasis protein	gi|148596990|ref|NP_057044.2|//copper homeostasis protein cutC homolog [Homo sapiens]
84649	2378	202.858	308.423	0.604437	1.47e-06	*	1.47e-07	DGAT2	GO:0005811//lipid particle;GO:0030176//integral component of endoplasmic reticulum membrane;GO:0005739//mitochondrion;GO:0048471//perinuclear region of cytoplasm	GO:0003846//2-acylglycerol O-acyltransferase activity;GO:0004144//diacylglycerol O-acyltransferase activity;GO:0050252//retinol O-fatty-acyltransferase activity;GO:0042803//protein homodimerization activity	GO:0034383//low-density lipoprotein particle clearance;GO:0035356//cellular triglyceride homeostasis;GO:0036155//acylglycerol acyl-chain remodeling;GO:0071400//cellular response to oleic acid;GO:0046474//glycerophospholipid biosynthetic process;GO:0006071//glycerol metabolic process;GO:0019915//lipid storage;GO:0055089//fatty acid homeostasis;GO:0035336//long-chain fatty-acyl-CoA metabolic proces…	K11160//diacylglycerol O-acyltransferase 2 [EC:2.3.1.20 2.3.1.75]	gi|767968893|ref|XP_011543606.1|//PREDICTED: diacylglycerol O-acyltransferase 2 isoform X1 [Homo sapiens];gi|359806523|ref|NP_001240820.1|//diacylglycerol O-acyltransferase 2 isoform 2 [Homo sapiens] ;gi|26024197|ref|NP_115953.2|//diacylglycerol O-acyltransferase 2 isoform 1 [Homo sapiens]
102157402	967	343.71	521.806	0.602322	6.48e-10	*	3.84e-11	AK6	GO:0005759//mitochondrial matrix;GO:0016020//membrane;GO:0000125//PCAF complex;GO:0005669//transcription factor TFIID complex;GO:0033276//transcription factor TFTC complex;GO:0071339//MLL1 complex;GO:0005730//nucleolus;GO:0030914//STAGA complex;GO:0015030//Cajal body;GO:0070761//pre-snoRNP complex	GO:0005524//ATP binding;GO:0050145//nucleoside phosphate kinase activity;GO:0002039//p53 binding;GO:0004402//histone acetyltransferase activity;GO:0046982//protein heterodimerization activity;GO:0051117//ATPase binding;GO:0004017//adenylate kinase activity;GO:0044212//transcription regulatory region DNA binding;GO:0046899//nucleoside triphosphate adenylate kinase activity;GO:0003713//transcriptio…	GO:0030307//positive regulation of cell growth;GO:0043066//negative regulation of apoptotic process;GO:0016032//viral process;GO:0060760//positive regulation of response to cytokine stimulus;GO:0006368//transcription elongation from RNA polymerase II promoter;GO:0043966//histone H3 acetylation;GO:0070555//response to interleukin-1;GO:0045944//positive regulation of transcription from RNA polymera…	K18532//adenylate kinase [EC:2.7.4.3]	gi|60593443|pdb|1RKB|A//Chain A, The Structure Of Adrenal Gland Protein Ad-004;gi|297675400|ref|XP_002815668.1|//PREDICTED: adenylate kinase isoenzyme 6 isoform X2 [Pongo abelii]
140766	3901	11.6173	17.6276	0.601565	0.232047	*	0.0964234	ADAMTS14	GO:0005578//proteinaceous extracellular matrix	GO:0004222//metalloendopeptidase activity;GO:0008270//zinc ion binding	GO:0006508//proteolysis;GO:0030199//collagen fibril organization;GO:0030574//collagen catabolic process	K08628//a disintegrin and metalloproteinase with thrombospondin motifs 14 [EC:3.4.24.-]	gi|767961666|ref|XP_011537608.1|//PREDICTED: A disintegrin and metalloproteinase with thrombospondin motifs 14 isoform X6 [Homo sapiens];gi|21265052|ref|NP_542453.2|//A disintegrin and metalloproteinase with thrombospondin motifs 14 isoform 2 preproprotein [Homo sapiens];gi|110611167|ref|NP_631894.2|//A disintegrin and metalloproteinase with thrombospondin motifs 14 isoform 1 preproprotein [Homo …
105372109	2697	13.7344	20.8372	0.601368	0.222573	*	0.091353	LOC105372109	NA	NA	NA	NA	gi|767898885|ref|XP_011507119.1|//PREDICTED: uncharacterized protein LOC105372109 [Homo sapiens]
2840	2315	1.31722	1.99816	0.601184	0.221398	*	0.0906441	GPR17	GO:0005887//integral component of plasma membrane	GO:0004950//chemokine receptor activity	GO:0007186//G-protein coupled receptor signaling pathway;GO:0070098//chemokine-mediated signaling pathway	K08404//G protein-coupled receptor 17	gi|4885301|ref|NP_005282.1|//uracil nucleotide/cysteinyl leukotriene receptor isoform a [Homo sapiens]
3903	2746	101.494	153.713	0.598853	0.000728966	*	0.000126393	LAIR1	GO:0070062//extracellular vesicular exosome;GO:0016021//integral component of membrane;GO:0005886//plasma membrane	GO:0005515//protein binding	NA	K06725//leukocyte-associated Ig-like receptor	gi|612407867|ref|NP_001275952.2|//leukocyte-associated immunoglobulin-like receptor 1 isoform c precursor [Homo sapiens];gi|768009184|ref|XP_011525262.1|//PREDICTED: leukocyte-associated immunoglobulin-like receptor 1 isoform X1 [Homo sapiens];gi|612407869|ref|NP_001275954.2|//leukocyte-associated immunoglobulin-like receptor 1 isoform e precursor [Homo sapiens];gi|612407861|ref|NP_068352.2|//leu…
51421	4405	464.315	703.085	0.598596	7.78e-13	*	3.27e-14	AMOTL2	GO:0016324//apical plasma membrane;GO:0005829//cytosol;GO:0031410//cytoplasmic vesicle;GO:0005923//tight junction;GO:0055037//recycling endosome	GO:0042802//identical protein binding	GO:0035329//hippo signaling;GO:0016055//Wnt signaling pathway	K06104//angiomotin like 1	gi|522838240|ref|NP_001265612.1|//angiomotin-like protein 2 isoform 1 [Homo sapiens];gi|32484977|ref|NP_057285.3|//angiomotin-like protein 2 isoform 2 [Homo sapiens];gi|522838244|ref|NP_001265614.1|//angiomotin-like protein 2 isoform 3 [Homo sapiens]
50507	4062	3.03285	4.59015	0.597865	0.319243	*	0.145831	NOX4	GO:0001725//stress fiber;GO:0005730//nucleolus;GO:0005925//focal adhesion;GO:0016324//apical plasma membrane;GO:0043020//NADPH oxidase complex;GO:0005739//mitochondrion;GO:0005789//endoplasmic reticulum membrane;GO:0048471//perinuclear region of cytoplasm	GO:0009055//electron carrier activity;GO:0016174//NAD(P)H oxidase activity;GO:0020037//heme binding;GO:0005515//protein binding;GO:0072341//modified amino acid binding;GO:0019826//oxygen sensor activity;GO:0050660//flavin adenine dinucleotide binding;GO:0016175//superoxide-generating NADPH oxidase activity	GO:0051897//positive regulation of protein kinase B signaling;GO:0035051//cardiocyte differentiation;GO:0055114//oxidation-reduction process;GO:0071320//cellular response to cAMP;GO:0071560//cellular response to transforming growth factor beta stimulus;GO:0043065//positive regulation of apoptotic process;GO:0042554//superoxide anion generation;GO:0008285//negative regulation of cell proliferation…	K08008//NADPH oxidase	gi|633257767|ref|NP_001278858.1|//NADPH oxidase 4 isoform f [Homo sapiens] ;gi|665821293|ref|NP_001287924.1|//NADPH oxidase 4 isoform g [Homo sapiens] ;gi|219842346|ref|NP_001137308.1|//NADPH oxidase 4 isoform b [Homo sapiens];gi|578822229|ref|XP_006718912.1|//PREDICTED: NADPH oxidase 4 isoform X4 [Homo sapiens];gi|8393843|ref|NP_058627.1|//NADPH oxidase 4 isoform a [Homo sapiens];gi|767970234|re…
100132247	3827	196.235	296.809	0.59695	1.78e-05	*	2.15e-06	NPIPB5	GO:0016021//integral component of membrane	NA	NA	NA	gi|209529739|ref|NP_001129337.1|//nuclear pore complex interacting protein family member [Homo sapiens]
4815	983	391.797	592.592	0.596933	7.4e-11	*	3.85e-12	NINJ2	GO:0005887//integral component of plasma membrane	GO:0005515//protein binding	GO:0007399//nervous system development;GO:0042246//tissue regeneration;GO:0007158//neuron cell-cell adhesion	NA	gi|661567385|ref|NP_001281274.1|//ninjurin-2 isoform 2 [Homo sapiens];gi|661567387|ref|NP_001281275.1|//ninjurin-2 isoform 3 [Homo sapiens];gi|39725946|ref|NP_057617.2|//ninjurin-2 isoform 1 [Homo sapiens]
5739	2069	1.58749	2.40107	0.596929	0.265807	*	0.114918	PTGIR	GO:0005887//integral component of plasma membrane;GO:0005829//cytosol	GO:0005085//guanyl-nucleotide exchange factor activity;GO:0004930//G-protein coupled receptor activity	GO:0048662//negative regulation of smooth muscle cell proliferation;GO:0007596//blood coagulation;GO:0007267//cell-cell signaling;GO:0032496//response to lipopolysaccharide;GO:0010642//negative regulation of platelet-derived growth factor receptor signaling pathway;GO:0007189//adenylate cyclase-activating G-protein coupled receptor signaling pathway;GO:0030819//positive regulation of cAMP biosynt…	K04263//prostacyclin receptor	gi|4506263|ref|NP_000951.1|//prostacyclin receptor [Homo sapiens]
768206	4818	62.8032	94.8674	0.595074	0.0165925	*	0.00415576	PRCD	GO:0016021//integral component of membrane;GO:0005737//cytoplasm	NA	GO:0050896//response to stimulus;GO:0007601//visual perception	K19637//progressive rod-cone degeneration protein	gi|117606326|ref|NP_001071088.1|//progressive rod-cone degeneration protein precursor [Homo sapiens]
102724197	1740	23.153	34.9685	0.594855	0.160857	*	0.0604514	LOC102724197	NA	NA	NA	K18592//gamma-glutamyltranspeptidase / glutathione hydrolase / leukotriene-C4 hydrolase [EC:2.3.2.2 3.4.19.13 3.4.19.14]	gi|768041683|ref|XP_011544556.1|//PREDICTED: putative gamma-glutamyltransferase light chain 3 isoform X11 [Homo sapiens];gi|578839189|ref|XP_006724987.1|//PREDICTED: putative gamma-glutamyltransferase light chain 3 isoform X8 [Homo sapiens];gi|768041702|ref|XP_011544558.1|//PREDICTED: inactive gamma-glutamyltranspeptidase 2-like isoform X15 [Homo sapiens];gi|578839183|ref|XP_006724984.1|//PREDICT…
105374378	1750	2.9112	4.39276	0.593511	0.3292	*	0.151533	LOC105374378	NA	NA	NA	NA	gi|767879501|ref|XP_011511919.1|//PREDICTED: uncharacterized protein LOC105374378 isoform X5 [Homo sapiens];gi|767879511|ref|XP_011511931.1|//PREDICTED: uncharacterized protein LOC105374378 isoform X10 [Homo sapiens];gi|767879513|ref|XP_011511941.1|//PREDICTED: uncharacterized protein LOC105374378 isoform X11 [Homo sapiens];gi|767879503|ref|XP_011511923.1|//PREDICTED: uncharacterized protein LOC1…
51267	2879	1.58857	2.397	0.593498	0.268566	*	0.116446	CLEC1A	GO:0005887//integral component of plasma membrane;GO:0005622//intracellular	GO:0030246//carbohydrate binding;GO:0004888//transmembrane signaling receptor activity	GO:0006952//defense response;GO:0007166//cell surface receptor signaling pathway	K10069//C-type lectin domain family 1 member A	gi|675792831|ref|XP_008953240.1|//PREDICTED: C-type lectin domain family 1 member A isoform X2 [Pan paniscus];gi|37577103|ref|NP_057595.2|//C-type lectin domain family 1 member A isoform a [Homo sapiens];gi|663071159|ref|NP_001284677.1|//C-type lectin domain family 1 member A isoform b [Homo sapiens];gi|663071161|ref|NP_001284678.1|//C-type lectin domain family 1 member A isoform c [Homo sapiens]…
10071	16321	5.29598	7.98723	0.592798	0.329399	*	0.151722	MUC12	NA	NA	NA	NA	gi|256600257|ref|NP_001157934.1|//mucin-12 precursor [Homo sapiens]
166336	7924	4.23956	6.39257	0.592482	0.33509	*	0.155288	PRICKLE2	GO:0031965//nuclear membrane;GO:0005737//cytoplasm	GO:0008270//zinc ion binding	GO:0031175//neuron projection development;GO:0045197//establishment or maintenance of epithelial cell apical/basal polarity	K04511//prickle	gi|38524620|ref|NP_942559.1|//prickle-like protein 2 [Homo sapiens];gi|767922507|ref|XP_011531735.1|//PREDICTED: prickle-like protein 2 isoform X2 [Homo sapiens];gi|767922511|ref|XP_011531737.1|//PREDICTED: prickle-like protein 2 isoform X4 [Homo sapiens];gi|767922509|ref|XP_011531736.1|//PREDICTED: prickle-like protein 2 isoform X3 [Homo sapiens];gi|767922517|ref|XP_011531740.1|//PREDICTED: pric…
3991	2673	14.5744	21.9734	0.592326	0.200554	*	0.0799191	LIPE	GO:0005901//caveola;GO:0005811//lipid particle;GO:0005829//cytosol	GO:0033878//hormone-sensitive lipase activity;GO:0004806//triglyceride lipase activity;GO:0019901//protein kinase binding	GO:0019433//triglyceride catabolic process;GO:0008203//cholesterol metabolic process;GO:0006468//protein phosphorylation;GO:0046340//diacylglycerol catabolic process	K07188//hormone-sensitive lipase [EC:3.1.1.79]	gi|21328446|ref|NP_005348.2|//hormone-sensitive lipase [Homo sapiens];gi|1488677|gb|AAC50666.1|//hormone-sensitive lipase testicular isoform [Homo sapiens]
254778	3471	1.98965	2.99642	0.590722	0.291165	*	0.129456	C8orf46	NA	NA	NA	NA	gi|197304724|ref|NP_689978.2|//uncharacterized protein C8orf46 [Homo sapiens]
317671	2002	90.2223	135.838	0.590333	0.00193381	*	0.00037273	RFESD	NA	GO:0046872//metal ion binding;GO:0051537//2 iron, 2 sulfur cluster binding;GO:0005515//protein binding;GO:0016491//oxidoreductase activity	GO:0055114//oxidation-reduction process	NA	gi|694910275|ref|XP_009447093.1|//PREDICTED: Rieske domain-containing protein isoform X1 [Pan troglodytes];gi|197100526|ref|NP_001124537.1|//Rieske domain-containing protein isoform 1 [Homo sapiens]
55200	2981	31.9618	48.1092	0.589965	0.0816372	*	0.0268505	PLEKHG6	GO:0000922//spindle pole;GO:0032154//cleavage furrow;GO:0005737//cytoplasm;GO:0005902//microvillus	GO:0005515//protein binding;GO:0005089//Rho guanyl-nucleotide exchange factor activity;GO:0005096//GTPase activator activity	GO:0035023//regulation of Rho protein signal transduction	K19464//pleckstrin homology domain-containing family G member 5	gi|222080066|ref|NP_060643.2|//pleckstrin homology domain-containing family G member 6 isoform a [Homo sapiens];gi|578822615|ref|XP_006719048.1|//PREDICTED: pleckstrin homology domain-containing family G member 6 isoform X2 [Homo sapiens];gi|222080070|ref|NP_001138329.1|//pleckstrin homology domain-containing family G member 6 isoform b [Homo sapiens];gi|767971347|ref|XP_011519269.1|//PREDICTED: …
3891	1937	51.7719	77.8958	0.589375	0.0345408	*	0.0097935	KRT85	GO:0005615//extracellular space;GO:0045095//keratin filament	GO:0005198//structural molecule activity	GO:0008544//epidermis development	K07605//type II keratin, basic	gi|4504935|ref|NP_002274.1|//keratin, type II cuticular Hb5 isoform 1 [Homo sapiens];gi|664806102|ref|NP_001287739.1|//keratin, type II cuticular Hb5 isoform 2 [Homo sapiens]
7070	2161	1501.58	2258.04	0.588592	1.32e-32	*	1.09e-34	THY1	GO:0030425//dendrite;GO:0070062//extracellular vesicular exosome;GO:0005783//endoplasmic reticulum;GO:0031362//anchored component of external side of plasma membrane;GO:0005925//focal adhesion;GO:0016324//apical plasma membrane;GO:0043209//myelin sheath;GO:0030426//growth cone;GO:0005887//integral component of plasma membrane;GO:0045121//membrane raft;GO:0005829//cytosol	GO:0005178//integrin binding;GO:0005096//GTPase activator activity;GO:0019901//protein kinase binding;GO:0034235//GPI anchor binding	GO:0001525//angiogenesis;GO:0030336//negative regulation of cell migration;GO:0043547//positive regulation of GTPase activity;GO:0051281//positive regulation of release of sequestered calcium ion into cytosol;GO:0050870//positive regulation of T cell activation;GO:0050860//negative regulation of T cell receptor signaling pathway;GO:0006469//negative regulation of protein kinase activity;GO:000701…	K06514//Thy-1 cell surface antigen	gi|19923362|ref|NP_006279.2|//thy-1 membrane glycoprotein preproprotein [Homo sapiens]
4861	1552	6.36399	9.56828	0.58833	0.329389	*	0.151648	NPAS1	GO:0005634//nucleus	GO:0000981//sequence-specific DNA binding RNA polymerase II transcription factor activity;GO:0003677//DNA binding;GO:0046983//protein dimerization activity	GO:0006351//transcription, DNA-templated;GO:0007417//central nervous system development	K09098//neuronal PAS domain-containing protein 1/3	gi|22027482|ref|NP_002508.2|//neuronal PAS domain-containing protein 1 [Homo sapiens];gi|768009401|ref|XP_011525302.1|//PREDICTED: neuronal PAS domain-containing protein 1 isoform X4 [Homo sapiens];gi|768009422|ref|XP_011525308.1|//PREDICTED: neuronal PAS domain-containing protein 1 isoform X9 [Homo sapiens];gi|194386742|dbj|BAG61181.1|//unnamed protein product [Homo sapiens];gi|768009409|ref|XP_…
4648	6904	1.9907	2.98996	0.586849	0.294937	*	0.131383	MYO7B	GO:0070062//extracellular vesicular exosome;GO:0005903//brush border;GO:0016459//myosin complex;GO:0005902//microvillus;GO:0090651//null	GO:0003779//actin binding;GO:0005524//ATP binding;GO:0003774//motor activity	NA	K10359//myosin VII	gi|578804363|ref|XP_006712602.1|//PREDICTED: unconventional myosin-VIIb isoform X2 [Homo sapiens];gi|122937512|ref|NP_001073996.1|//unconventional myosin-VIIb [Homo sapiens];gi|767918227|ref|XP_011509520.1|//PREDICTED: unconventional myosin-VIIb isoform X1 [Homo sapiens]
79098	5379	14.6071	21.9342	0.586517	0.21544	*	0.0876805	C1orf116	GO:0070062//extracellular vesicular exosome;GO:0005737//cytoplasm	GO:0005515//protein binding	NA	NA	gi|145275189|ref|NP_076427.2|//specifically androgen-regulated gene protein isoform 1 [Homo sapiens]
729627	2307	4.90998	7.3686	0.585672	0.339093	*	0.157798	PRR23A	NA	NA	NA	NA	gi|197927236|ref|NP_001128131.1|//proline-rich protein 23A [Homo sapiens]
29943	3749	13.7076	20.5609	0.584921	0.23676	*	0.0989581	PADI1	GO:0070062//extracellular vesicular exosome;GO:0005829//cytosol	GO:0005509//calcium ion binding;GO:0004668//protein-arginine deiminase activity	GO:0018101//protein citrullination	K01481//protein-arginine deiminase [EC:3.5.3.15]	gi|122056685|ref|NP_037490.2|//protein-arginine deiminase type-1 [Homo sapiens];gi|767903927|ref|XP_011539609.1|//PREDICTED: protein-arginine deiminase type-1 isoform X3 [Homo sapiens];gi|189054433|dbj|BAG37206.1|//unnamed protein product [Homo sapiens]
3659	2285	456.756	685.113	0.584919	1.94e-11	*	9.55e-13	IRF1	GO:0005654//nucleoplasm;GO:0005829//cytosol;GO:0000790//nuclear chromatin	GO:0000978//RNA polymerase II core promoter proximal region sequence-specific DNA binding;GO:0005515//protein binding;GO:0001077//RNA polymerase II core promoter proximal region sequence-specific DNA binding transcription factor activity involved in positive regulation of transcription	GO:0034124//regulation of MyD88-dependent toll-like receptor signaling pathway;GO:0060337//type I interferon signaling pathway;GO:0007596//blood coagulation;GO:0071260//cellular response to mechanical stimulus;GO:0007050//cell cycle arrest;GO:2000564//regulation of CD8-positive, alpha-beta T cell proliferation;GO:0035458//cellular response to interferon-beta;GO:0043374//CD8-positive, alpha-beta T…	K09444//interferon regulatory factor 1	gi|767935850|ref|XP_011541681.1|//PREDICTED: interferon regulatory factor 1 isoform X2 [Homo sapiens];gi|4504721|ref|NP_002189.1|//interferon regulatory factor 1 [Homo sapiens];gi|608073385|gb|AHW49378.1|//interferon regulatory factor 1 isoform delta7 [Homo sapiens]
285220	10383	13.5634	20.3399	0.584592	0.219072	*	0.0894317	EPHA6	GO:0005654//nucleoplasm;GO:0005887//integral component of plasma membrane	GO:0005524//ATP binding;GO:0005003//ephrin receptor activity	NA	K05107//Eph receptor A6 [EC:2.7.10.1]	gi|635377445|sp|Q9UF33.3|EPHA6_HUMAN//RecName: Full=Ephrin type-A receptor 6; AltName: Full=EPH homology kinase 2; Short=EHK-2; AltName: Full=EPH-like kinase 12; Short=EK12; Flags: Precursor ;gi|795624368|ref|XP_011732224.1|//PREDICTED: ephrin type-A receptor 6 isoform X3 [Macaca nemestrina];gi|507144073|ref|NP_001265229.1|//ephrin type-A receptor 6 isoform c [Homo sapiens];gi|694902852|ref|XP_00…
80125	2938	97.3576	145.96	0.584206	0.00304042	*	0.000618701	CCDC33	NA	GO:0005515//protein binding	NA	NA	gi|767985461|ref|XP_011520392.1|//PREDICTED: coiled-coil domain-containing protein 33 isoform X6 [Homo sapiens];gi|117168273|ref|NP_079331.3|//coiled-coil domain-containing protein 33 isoform 1 [Homo sapiens];gi|578827432|ref|XP_006720760.1|//PREDICTED: coiled-coil domain-containing protein 33 isoform X2 [Homo sapiens];gi|767985453|ref|XP_011520388.1|//PREDICTED: coiled-coil domain-containing pro…
64130	726	42.5794	63.8187	0.583824	0.0386682	*	0.0111911	LIN7B	GO:0016323//basolateral plasma membrane;GO:0098590//plasma membrane region;GO:0098793//null;GO:0014069//postsynaptic density;GO:0043005//neuron projection;GO:0005911//cell-cell junction;GO:0005923//tight junction;GO:0097458//neuron part;GO:0044456//synapse part;GO:0045211//postsynaptic membrane	GO:0030165//PDZ domain binding	GO:0007269//neurotransmitter secretion;GO:0015031//protein transport;GO:0006887//exocytosis	K19931//null	gi|817473368|ref|NP_001295348.1|//protein lin-7 homolog B isoform 2 [Homo sapiens];gi|11545920|ref|NP_071448.1|//protein lin-7 homolog B isoform 1 [Homo sapiens];gi|602706243|ref|XP_007463406.1|//PREDICTED: protein lin-7 homolog B [Lipotes vexillifer]
1014	2635	2.78645	4.17262	0.582524	0.32184	*	0.14717	CDH16	GO:0016323//basolateral plasma membrane;GO:0070062//extracellular vesicular exosome;GO:0016021//integral component of membrane	GO:0005509//calcium ion binding	GO:0007156//homophilic cell adhesion via plasma membrane adhesion molecules	K06810//cadherin 16, KSP-cadherin	gi|4757956|ref|NP_004053.1|//cadherin-16 isoform 1 precursor [Homo sapiens];gi|767989257|ref|XP_011521109.1|//PREDICTED: cadherin-16 isoform X1 [Homo sapiens];gi|325296973|ref|NP_001191674.1|//cadherin-16 isoform 3 precursor [Homo sapiens] ;gi|325296969|ref|NP_001191673.1|//cadherin-16 isoform 2 precursor [Homo sapiens];gi|325296975|ref|NP_001191675.1|//cadherin-16 isoform 4 precursor [Homo sapie…
7424	2103	301.796	451.849	0.582266	2.17e-08	*	1.63e-09	VEGFC	GO:0016020//membrane;GO:0031093//platelet alpha granule lumen;GO:0005615//extracellular space	GO:0008083//growth factor activity;GO:0043185//vascular endothelial growth factor receptor 3 binding;GO:0042056//chemoattractant activity	GO:0050930//induction of positive chemotaxis;GO:0030168//platelet activation;GO:0051781//positive regulation of cell division;GO:0031954//positive regulation of protein autophosphorylation;GO:0045776//negative regulation of blood pressure;GO:0002576//platelet degranulation;GO:0060754//positive regulation of mast cell chemotaxis;GO:0002052//positive regulation of neuroblast proliferation;GO:190149…	K05449//vascular endothelial growth factor C/D	gi|4885653|ref|NP_005420.1|//vascular endothelial growth factor C preproprotein [Homo sapiens]
100996379	1074	0.930376	1.39191	0.581184	0.180142	*	0.0698284	LOC100996379	NA	NA	NA	K10595//E3 ubiquitin-protein ligase HERC2 [EC:2.3.2.26]	NA
81616	2205	4.26758	6.38435	0.581124	0.349656	*	0.163752	ACSBG2	GO:0005829//cytosol;GO:0016021//integral component of membrane;GO:0005739//mitochondrion	GO:0047617//acyl-CoA hydrolase activity;GO:0005524//ATP binding;GO:0004467//long-chain fatty acid-CoA ligase activity;GO:0031957//very long-chain fatty acid-CoA ligase activity	GO:0030154//cell differentiation;GO:0007275//multicellular organismal development;GO:0001676//long-chain fatty acid metabolic process;GO:0007283//spermatogenesis	K15013//long-chain-fatty-acid--CoA ligase ACSBG [EC:6.2.1.3]	gi|768004222|ref|XP_011526631.1|//PREDICTED: long-chain-fatty-acid--CoA ligase ACSBG2 isoform X5 [Homo sapiens];gi|574584773|ref|NP_001276108.1|//long-chain-fatty-acid--CoA ligase ACSBG2 isoform b [Homo sapiens];gi|83745141|ref|NP_112186.3|//long-chain-fatty-acid--CoA ligase ACSBG2 isoform a [Homo sapiens];gi|578833665|ref|XP_006722978.1|//PREDICTED: long-chain-fatty-acid--CoA ligase ACSBG2 isofo…
2875	1896	48.9052	73.1203	0.580284	0.0280673	*	0.00765716	GPT	GO:0070062//extracellular vesicular exosome;GO:0005615//extracellular space;GO:0005829//cytosol	GO:0004021//L-alanine:2-oxoglutarate aminotransferase activity;GO:0030170//pyridoxal phosphate binding	GO:0008652//cellular amino acid biosynthetic process;GO:0042853//L-alanine catabolic process;GO:0034641//cellular nitrogen compound metabolic process;GO:0006094//gluconeogenesis	K17458//protein phosphatase 1 regulatory subunit 16A;K00814//alanine transaminase [EC:2.6.1.2]	gi|4885351|ref|NP_005300.1|//alanine aminotransferase 1 [Homo sapiens]
3489	974	414.894	619.365	0.578047	1.6e-09	*	9.99e-11	IGFBP6	GO:0070062//extracellular vesicular exosome;GO:0005615//extracellular space;GO:0005794//Golgi apparatus	GO:0031994//insulin-like growth factor I binding;GO:0005102//receptor binding;GO:0031995//insulin-like growth factor II binding	GO:0001558//regulation of cell growth;GO:0007165//signal transduction;GO:0008285//negative regulation of cell proliferation	K10138//insulin-like growth factor-binding protein 3;K00637//sterol O-acyltransferase [EC:2.3.1.26]	gi|11321593|ref|NP_002169.1|//insulin-like growth factor-binding protein 6 precursor [Homo sapiens]
27063	1994	2.26973	3.38747	0.577685	0.325896	*	0.149605	ANKRD1	GO:0005654//nucleoplasm;GO:0005730//nucleolus;GO:0005667//transcription factor complex;GO:0005829//cytosol;GO:0031674//I band	GO:0003677//DNA binding;GO:0003714//transcription corepressor activity;GO:0001105//RNA polymerase II transcription coactivator activity;GO:0002039//p53 binding;GO:0042826//histone deacetylase binding;GO:0070412//R-SMAD binding;GO:0031432//titin binding;GO:0001085//RNA polymerase II transcription factor binding	GO:0071456//cellular response to hypoxia;GO:0035690//cellular response to drug;GO:0071260//cellular response to mechanical stimulus;GO:0071222//cellular response to lipopolysaccharide;GO:0071356//cellular response to tumor necrosis factor;GO:0044281//small molecule metabolic process;GO:0055008//cardiac muscle tissue morphogenesis;GO:0000122//negative regulation of transcription from RNA polymeras…	K06694//26S proteasome non-ATPase regulatory subunit 10;K11810//MFS transporter, MCP family, solute carrier family 16 (monocarboxylic acid transporters), member 12	gi|38327522|ref|NP_055206.2|//ankyrin repeat domain-containing protein 1 [Homo sapiens]
54881	3080	506.404	755.258	0.57668	7.21e-11	*	3.74e-12	TEX10	GO:0031965//nuclear membrane;GO:0071339//MLL1 complex;GO:0005730//nucleolus;GO:0016021//integral component of membrane;GO:0005737//cytoplasm	GO:0005515//protein binding	NA	K14827//pre-rRNA-processing protein IPI1	gi|767957732|ref|XP_011517100.1|//PREDICTED: testis-expressed sequence 10 protein isoform X1 [Homo sapiens];gi|239787844|ref|NP_001155056.1|//testis-expressed sequence 10 protein isoform 2 [Homo sapiens] ;gi|239787838|ref|NP_060216.2|//testis-expressed sequence 10 protein isoform 1 [Homo sapiens];gi|355567584|gb|EHH23925.1|//Testis-expressed sequence 10 protein [Macaca mulatta]
10761	1103	29.8911	44.5731	0.576455	0.0900023	*	0.0300934	PLAC1	GO:0005576//extracellular region	NA	GO:0090214//spongiotrophoblast layer developmental growth	NA	gi|11496283|ref|NP_068568.1|//placenta-specific protein 1 precursor [Homo sapiens]
388962	537	417.177	621.794	0.575775	3.11e-11	*	1.55e-12	BOLA3	GO:0005576//extracellular region	NA	NA	NA	gi|78486586|ref|NP_997717.2|//bolA-like protein 3 isoform 1 [Homo sapiens];gi|78486578|ref|NP_001030582.1|//bolA-like protein 3 isoform 2 [Homo sapiens]
6532	6615	4.00831	5.97396	0.575692	0.355433	*	0.16785	SLC6A4	GO:0010008//endosome membrane;GO:0005887//integral component of plasma membrane;GO:0045121//membrane raft;GO:0005829//cytosol;GO:0098793//null;GO:0043005//neuron projection	GO:0005335//serotonin:sodium symporter activity;GO:0017075//syntaxin-1 binding;GO:0051015//actin filament binding;GO:0042803//protein homodimerization activity;GO:0019811//cocaine binding;GO:0050998//nitric-oxide synthase binding;GO:0046872//metal ion binding;GO:0017022//myosin binding;GO:0017137//Rab GTPase binding	GO:0042310//vasoconstriction;GO:0051260//protein homooligomerization;GO:0009636//response to toxic substance;GO:0032227//negative regulation of synaptic transmission, dopaminergic;GO:0032355//response to estradiol;GO:0046621//negative regulation of organ growth;GO:0007584//response to nutrient;GO:0021794//thalamus development;GO:0042713//sperm ejaculation;GO:0007623//circadian rhythm;GO:0042493//…	K05037//solute carrier family 6 (neurotransmitter transporter, serotonin) member 4	gi|119571608|gb|EAW51223.1|//solute carrier family 6 (neurotransmitter transporter, serotonin), member 4 [Homo sapiens]
23114	7424	2.26393	3.3729	0.575157	0.327496	*	0.150495	NFASC	GO:0070062//extracellular vesicular exosome;GO:0005925//focal adhesion;GO:0097454//Schwann cell microvillus;GO:0043194//axon initial segment;GO:0005622//intracellular;GO:0043209//myelin sheath;GO:0033270//paranode region of axon;GO:0016021//integral component of membrane;GO:0033268//node of Ranvier;GO:0005886//plasma membrane;GO:0033010//paranodal junction	GO:0086080//protein binding involved in heterotypic cell-cell adhesion;GO:0019904//protein domain specific binding	GO:0007155//cell adhesion;GO:0007422//peripheral nervous system development;GO:0050808//synapse organization;GO:0071205//protein localization to juxtaparanode region of axon;GO:0007411//axon guidance;GO:0002175//protein localization to paranode region of axon;GO:0030913//paranodal junction assembly	K06757//neurofascin	gi|635131207|ref|XP_007986983.1|//PREDICTED: neurofascin isoform X20 [Chlorocebus sabaeus];gi|767908725|ref|XP_011507614.1|//PREDICTED: neurofascin isoform X2 [Homo sapiens];gi|767908733|ref|XP_011507618.1|//PREDICTED: neurofascin isoform X6 [Homo sapiens];gi|194387752|dbj|BAG61289.1|//unnamed protein product [Homo sapiens];gi|767908759|ref|XP_005245050.2|//PREDICTED: neurofascin isoform X19 [Hom…
218	1619	509.219	758.297	0.574478	4.73e-13	*	1.95e-14	ALDH3A1	GO:0005615//extracellular space;GO:0005654//nucleoplasm;GO:0005783//endoplasmic reticulum;GO:0005829//cytosol;GO:0016021//integral component of membrane;GO:0005886//plasma membrane	GO:0004028//3-chloroallyl aldehyde dehydrogenase activity;GO:0005515//protein binding;GO:0018479//benzaldehyde dehydrogenase (NAD+) activity;GO:0008106//alcohol dehydrogenase (NADP+) activity;GO:0004030//aldehyde dehydrogenase [NAD(P)+] activity	GO:0042493//response to drug;GO:0051591//response to cAMP;GO:0055114//oxidation-reduction process;GO:0001666//response to hypoxia;GO:0007568//aging;GO:0006081//cellular aldehyde metabolic process;GO:0007584//response to nutrient;GO:0051384//response to glucocorticoid;GO:0008284//positive regulation of cell proliferation	K00129//aldehyde dehydrogenase (NAD(P)+) [EC:1.2.1.5]	gi|22907049|ref|NP_000682.3|//aldehyde dehydrogenase, dimeric NADP-preferring [Homo sapiens]
107986596	2788	8.26496	12.3072	0.574424	0.315283	*	0.143329	LOC107986596	NA	NA	NA	NA	NA
285025	8067	2.93135	4.36466	0.574303	0.3493	*	0.163502	CCDC141	NA	NA	NA	K12567//titin [EC:2.7.11.1]	gi|941355821|ref|NP_001303674.1|//coiled-coil domain-containing protein 141 isoform 2 [Homo sapiens] ;gi|299829223|ref|NP_775919.3|//coiled-coil domain-containing protein 141 isoform 1 [Homo sapiens] ;gi|767917659|ref|XP_011509293.1|//PREDICTED: coiled-coil domain-containing protein 141 isoform X1 [Homo sapiens]
131076	729	402.266	598.947	0.574278	2.19e-09	*	1.41e-10	CCDC58	GO:0005739//mitochondrion	NA	NA	K17784//mitochondrial inner membrane organizing system protein 1;K16741//alstrom syndrome protein 1	gi|62988355|ref|NP_001017928.1|//coiled-coil domain-containing protein 58 isoform 1 [Homo sapiens];gi|815930053|ref|NP_001295255.1|//coiled-coil domain-containing protein 58 isoform 2 [Homo sapiens] ;gi|982236042|ref|XP_015301843.1|//PREDICTED: coiled-coil domain-containing protein 58 isoform X1 [Macaca fascicularis];gi|119599893|gb|EAW79487.1|//coiled-coil domain containing 58, isoform CRA_a [Ho…
130733	1468	2.53477	3.77407	0.574269	0.34447	*	0.16077	TMEM178A	GO:0016021//integral component of membrane;GO:0005789//endoplasmic reticulum membrane	NA	NA	K18755//importin-8	gi|269914178|ref|NP_689603.2|//transmembrane protein 178A isoform 1 precursor [Homo sapiens];gi|119620749|gb|EAX00344.1|//hypothetical protein MGC33926, isoform CRA_b [Homo sapiens];gi|269914169|ref|NP_001161431.1|//transmembrane protein 178A isoform 2 [Homo sapiens]
56261	5421	245.405	365.388	0.574265	1.18e-06	*	1.17e-07	GPCPD1	GO:0005829//cytosol	GO:2001070//starch binding;GO:0047389//glycerophosphocholine phosphodiesterase activity;GO:0008889//glycerophosphodiester phosphodiesterase activity	GO:0006071//glycerol metabolic process;GO:0046474//glycerophospholipid biosynthetic process	K18695//glycerophosphocholine phosphodiesterase GPCPD1 [EC:3.1.4.2]	gi|25901062|ref|NP_062539.1|//glycerophosphocholine phosphodiesterase GPCPD1 [Homo sapiens]
8355	467	12.294	18.2928	0.573328	0.261128	*	0.112291	HIST1H3G	GO:0016020//membrane;GO:0070062//extracellular vesicular exosome;GO:0000784//nuclear chromosome, telomeric region;GO:0005654//nucleoplasm;GO:0005913//cell-cell adherens junction;GO:0000788//nuclear nucleosome	GO:0042393//histone binding;GO:0003677//DNA binding;GO:0098641//cadherin binding involved in cell-cell adhesion;GO:0046982//protein heterodimerization activity	GO:0060968//regulation of gene silencing;GO:0007596//blood coagulation;GO:0051320//S phase;GO:0006334//nucleosome assembly	K11253//histone H3	gi|281345292|gb|EFB20876.1|//hypothetical protein PANDA_018573, partial [Ailuropoda melanoleuca]
474382	517	1.60257	2.3837	0.572815	0.283892	*	0.125384	H2AFB1	GO:0035327//transcriptionally active chromatin;GO:0000788//nuclear nucleosome	GO:0003677//DNA binding;GO:0046982//protein heterodimerization activity	GO:0006397//mRNA processing;GO:0006334//nucleosome assembly	K11251//histone H2A	gi|63029941|ref|NP_001017990.1|//histone H2A-Bbd type 1 [Homo sapiens]
2171	751	569.347	846.713	0.572566	5.25e-14	*	1.93e-15	FABP5	GO:0070062//extracellular vesicular exosome;GO:0005654//nucleoplasm;GO:0005829//cytosol	GO:0005515//protein binding;GO:0005504//fatty acid binding;GO:0005215//transporter activity	GO:0006006//glucose metabolic process;GO:0008544//epidermis development;GO:0015758//glucose transport;GO:0006656//phosphatidylcholine biosynthetic process	K08754//fatty acid-binding protein 5, epidermal	gi|597960138|pdb|4LKP|A//Chain A, Crystal Structure Of Apo Human Epidermal Fatty Acid Binding Protein (fabp5)
723790	534	203.425	302.502	0.572449	4.94e-06	*	5.41e-07	HIST2H2AA4	GO:0070062//extracellular vesicular exosome;GO:0000790//nuclear chromatin;GO:0000786//nucleosome	GO:0003677//DNA binding;GO:0046982//protein heterodimerization activity	GO:0006334//nucleosome assembly	K11251//histone H2A	gi|545823276|ref|XP_005663563.1|//PREDICTED: histone H2A type 2-A-like [Sus scrofa]
8337	534	203.425	302.502	0.572449	4.94e-06	*	5.41e-07	HIST2H2AA3	GO:0070062//extracellular vesicular exosome;GO:0000790//nuclear chromatin;GO:0000786//nucleosome	GO:0003677//DNA binding;GO:0046982//protein heterodimerization activity	GO:0006334//nucleosome assembly	K11251//histone H2A	gi|545823276|ref|XP_005663563.1|//PREDICTED: histone H2A type 2-A-like [Sus scrofa]
84830	1692	8.93955	13.2914	0.572217	0.310593	*	0.140736	ADTRP	GO:0016021//integral component of membrane;GO:0005886//plasma membrane	NA	NA	NA	gi|767940881|ref|XP_011513261.1|//PREDICTED: androgen-dependent TFPI-regulating protein isoform X4 [Homo sapiens];gi|119575708|gb|EAW55304.1|//chromosome 6 open reading frame 105, isoform CRA_a [Homo sapiens];gi|14249372|ref|NP_116133.1|//androgen-dependent TFPI-regulating protein isoform 2 [Homo sapiens];gi|221139836|ref|NP_001137420.1|//androgen-dependent TFPI-regulating protein isoform 1 [Homo…
8038	7934	2.93996	4.37104	0.57218	0.351464	*	0.164876	ADAM12	GO:0005654//nucleoplasm;GO:0005576//extracellular region;GO:0016021//integral component of membrane;GO:0005739//mitochondrion;GO:0005886//plasma membrane	GO:0004222//metalloendopeptidase activity;GO:0008270//zinc ion binding;GO:0017124//SH3 domain binding	GO:0007155//cell adhesion;GO:0006508//proteolysis;GO:0007173//epidermal growth factor receptor signaling pathway;GO:0007520//myoblast fusion	K06835//disintegrin and metalloproteinase domain-containing protein 12 [EC:3.4.24.-]	gi|73747887|ref|NP_067673.2|//disintegrin and metalloproteinase domain-containing protein 12 isoform 2 preproprotein [Homo sapiens];gi|572882555|ref|NP_001275904.1|//disintegrin and metalloproteinase domain-containing protein 12 isoform 5 preproprotein [Homo sapiens];gi|13027660|gb|AAC08702.2|//meltrin-L precursor [Homo sapiens];gi|572882446|ref|NP_001275902.1|//disintegrin and metalloproteinase …
3491	2295	256.019	380.467	0.571519	4.51e-07	*	4.12e-08	CYR61	GO:0005578//proteinaceous extracellular matrix	GO:0005520//insulin-like growth factor binding;GO:0005178//integrin binding;GO:0000166//nucleotide binding;GO:0008201//heparin binding;GO:0050840//extracellular matrix binding	GO:0030335//positive regulation of cell migration;GO:0030513//positive regulation of BMP signaling pathway;GO:0060710//chorio-allantoic fusion;GO:0043065//positive regulation of apoptotic process;GO:0002041//intussusceptive angiogenesis;GO:0045860//positive regulation of protein kinase activity;GO:0003181//atrioventricular valve morphogenesis;GO:0006935//chemotaxis;GO:0010811//positive regulation…	K06829//cysteine rich protein 61	gi|31542331|ref|NP_001545.2|//protein CYR61 precursor [Homo sapiens]
130827	1790	28.2137	41.9218	0.571306	0.102882	*	0.035243	TMEM182	GO:0016021//integral component of membrane	GO:0005515//protein binding	NA	K14722//solute carrier family 9 (sodium/hydrogen exchanger), member 2	gi|313104025|sp|Q6ZP80.2|TM182_HUMAN//RecName: Full=Transmembrane protein 182; Flags: Precursor;gi|119622191|gb|EAX01786.1|//hypothetical protein FLJ30294, isoform CRA_b, partial [Homo sapiens];gi|16549474|dbj|BAB70815.1|//unnamed protein product [Homo sapiens] ;gi|578803721|ref|XP_006712350.1|//PREDICTED: transmembrane protein 182 isoform X1 [Homo sapiens];gi|694895634|ref|XP_009441282.1|//PREDI…
1264	1482	1.86952	2.77665	0.570677	0.318712	*	0.14538	CNN1	GO:0005856//cytoskeleton;GO:0005925//focal adhesion	GO:0003779//actin binding;GO:0005516//calmodulin binding	GO:0031032//actomyosin structure organization;GO:0006940//regulation of smooth muscle contraction	K09228//KRAB domain-containing zinc finger protein;K07441//beta-1,4-N-acetylglucosaminyltransferase [EC:2.4.1.141];K20526//null	gi|426387261|ref|XP_004060092.1|//PREDICTED: calponin-1 isoform 1 [Gorilla gorilla gorilla];gi|694972753|ref|XP_009432861.1|//PREDICTED: calponin-1 isoform X1 [Pan troglodytes]
80723	1863	95.4876	141.815	0.570627	0.00209975	*	0.00040833	SLC35G2	GO:0005887//integral component of plasma membrane;GO:0005794//Golgi apparatus	NA	NA	NA	gi|147907044|ref|NP_001091069.1|//solute carrier family 35 member G2 [Homo sapiens]
3053	2237	10.5671	15.6939	0.570616	0.279497	*	0.122696	SERPIND1	GO:0070062//extracellular vesicular exosome;GO:0005615//extracellular space	GO:0004867//serine-type endopeptidase inhibitor activity;GO:0008201//heparin binding	GO:0007596//blood coagulation;GO:0010951//negative regulation of endopeptidase activity;GO:0030162//regulation of proteolysis;GO:0006935//chemotaxis	K03912//heparin cofactor II	gi|73858566|ref|NP_000176.2|//heparin cofactor 2 precursor [Homo sapiens]
55486	1398	966.686	1434.31	0.569235	1.97e-21	*	3.62e-23	PARL	GO:0005634//nucleus;GO:0005743//mitochondrial inner membrane;GO:0016021//integral component of membrane	GO:0004252//serine-type endopeptidase activity;GO:0005515//protein binding	GO:0006508//proteolysis;GO:2001243//negative regulation of intrinsic apoptotic signaling pathway;GO:0090201//negative regulation of release of cytochrome c from mitochondria	K09650//rhomboid-like protein [EC:3.4.21.105]	gi|530374887|ref|XP_005247641.1|//PREDICTED: presenilins-associated rhomboid-like protein, mitochondrial isoform X2 [Homo sapiens];gi|530374883|ref|XP_005247639.1|//PREDICTED: presenilins-associated rhomboid-like protein, mitochondrial isoform X1 [Homo sapiens];gi|83641878|ref|NP_001032728.1|//presenilins-associated rhomboid-like protein, mitochondrial isoform 2 preproprotein [Homo sapiens];gi|20…
55286	4961	10.0309	14.8671	0.567668	0.313253	*	0.142258	C4orf19	GO:0005654//nucleoplasm;GO:0030054//cell junction	GO:0005515//protein binding	NA	NA	gi|157388979|ref|NP_001098099.1|//uncharacterized protein C4orf19 [Homo sapiens]
83756	3559	13.2554	19.64	0.567215	0.25325	*	0.107895	TAS1R3	GO:1903767//null;GO:0016021//integral component of membrane;GO:0005886//plasma membrane	GO:0033041//sweet taste receptor activity;GO:0046982//protein heterodimerization activity;GO:0004930//G-protein coupled receptor activity	GO:0007186//G-protein coupled receptor signaling pathway;GO:0050917//sensory perception of umami taste;GO:0001582//detection of chemical stimulus involved in sensory perception of sweet taste	K04626//taste receptor type 1 member 3	gi|91206396|ref|NP_689414.1|//taste receptor type 1 member 3 precursor [Homo sapiens];gi|767906261|ref|XP_011540541.1|//PREDICTED: taste receptor type 1 member 3 isoform X1 [Homo sapiens];gi|21928569|dbj|BAC05873.1|//seven transmembrane helix receptor [Homo sapiens]
9095	2882	18.8786	27.9691	0.56708	0.183052	*	0.0712489	TBX19	GO:0005634//nucleus	GO:0001158//enhancer sequence-specific DNA binding;GO:0003700//sequence-specific DNA binding transcription factor activity	GO:0045165//cell fate commitment;GO:0009653//anatomical structure morphogenesis;GO:0021983//pituitary gland development;GO:0045944//positive regulation of transcription from RNA polymerase II promoter;GO:0042127//regulation of cell proliferation	K10184//T-box protein 19	gi|4827024|ref|NP_005140.1|//T-box transcription factor TBX19 [Homo sapiens]
7766	4181	1.20477	1.78326	0.565753	0.254358	*	0.108609	ZNF223	GO:0005634//nucleus	GO:0003677//DNA binding;GO:0046872//metal ion binding;GO:0005515//protein binding	GO:0006355//regulation of transcription, DNA-templated	K09228//KRAB domain-containing zinc finger protein	gi|156547039|ref|NP_037493.3|//zinc finger protein 223 [Homo sapiens];gi|119577649|gb|EAW57245.1|//zinc finger protein 223, isoform CRA_a [Homo sapiens]
8685	1451	1.20477	1.78326	0.565753	0.254358	*	0.108609	MARCO	GO:0005887//integral component of plasma membrane;GO:0030666//endocytic vesicle membrane;GO:0005581//collagen trimer	GO:0005044//scavenger receptor activity;GO:0004888//transmembrane signaling receptor activity;GO:0008329//signaling pattern recognition receptor activity	GO:0002221//pattern recognition receptor signaling pathway;GO:0007166//cell surface receptor signaling pathway	K13884//macrophage receptor with collagenous structure	gi|5803080|ref|NP_006761.1|//macrophage receptor MARCO [Homo sapiens];gi|767920349|ref|XP_011510385.1|//PREDICTED: macrophage receptor MARCO isoform X2 [Homo sapiens]
374900	4109	1.87298	2.77228	0.56574	0.323089	*	0.14801	ZNF568	GO:0005634//nucleus	GO:0003677//DNA binding;GO:0046872//metal ion binding;GO:0003700//sequence-specific DNA binding transcription factor activity	GO:0006355//regulation of transcription, DNA-templated	K09228//KRAB domain-containing zinc finger protein	gi|325651962|ref|NP_001191767.1|//zinc finger protein 568 isoform 5 [Homo sapiens];gi|117956407|ref|NP_940941.2|//zinc finger protein 568 isoform 1 [Homo sapiens];gi|325651956|ref|NP_001191764.1|//zinc finger protein 568 isoform 2 [Homo sapiens]
272	4339	130.118	192.56	0.565486	0.000420922	*	6.92e-05	AMPD3	GO:0005829//cytosol	GO:0046872//metal ion binding;GO:0003876//AMP deaminase activity	GO:0006196//AMP catabolic process;GO:0032264//IMP salvage;GO:0006144//purine nucleobase metabolic process	K01490//AMP deaminase [EC:3.5.4.6]	gi|4502079|ref|NP_000471.1|//AMP deaminase 3 isoform 1A [Homo sapiens];gi|70906428|ref|NP_001020561.1|//AMP deaminase 3 isoform 1C [Homo sapiens]
11076	6107	103.902	153.688	0.564792	0.00227429	*	0.000446457	TPPP	GO:0005634//nucleus;GO:0005874//microtubule;GO:0043209//myelin sheath;GO:0048471//perinuclear region of cytoplasm	GO:0008017//microtubule binding	GO:0032273//positive regulation of protein polymerization;GO:0046785//microtubule polymerization;GO:0001578//microtubule bundle formation	K20027//null	gi|119571401|gb|EAW51016.1|//brain-specific protein p25 alpha, isoform CRA_c [Homo sapiens];gi|26251744|gb|AAH40496.1|//TPPP protein, partial [Homo sapiens]
8601	1789	37.5364	55.5187	0.564682	0.0665004	*	0.021019	RGS20	GO:0005634//nucleus;GO:0005938//cell cortex;GO:0005881//cytoplasmic microtubule;GO:0030877//beta-catenin destruction complex;GO:0005802//trans-Golgi network;GO:0005886//plasma membrane;GO:0014069//postsynaptic density	GO:0070016//armadillo repeat domain binding;GO:0005096//GTPase activator activity;GO:0008013//beta-catenin binding;GO:0019901//protein kinase binding	GO:0038032//termination of G-protein coupled receptor signaling pathway;GO:0043547//positive regulation of GTPase activity	K16449//regulator of G-protein signaling	gi|557786158|ref|NP_001273604.1|//regulator of G-protein signaling 20 isoform e [Homo sapiens];gi|41281805|ref|NP_733466.1|//regulator of G-protein signaling 20 isoform a [Homo sapiens];gi|557786164|ref|NP_001273603.1|//regulator of G-protein signaling 20 isoform d [Homo sapiens];gi|13654235|ref|NP_003693.2|//regulator of G-protein signaling 20 isoform b [Homo sapiens];gi|557786129|ref|NP_0012736…
126259	918	3.88224	5.74149	0.564538	0.368659	*	0.176482	TMIGD2	GO:0005615//extracellular space;GO:0016021//integral component of membrane;GO:0005886//plasma membrane	GO:0005515//protein binding;GO:0015026//coreceptor activity	NA	K16668//transmembrane and immunoglobulin domain-containing protein 2	gi|15990523|gb|AAH15655.1|//Transmembrane and immunoglobulin domain containing 2 [Homo sapiens] ;gi|281306838|ref|NP_653216.2|//transmembrane and immunoglobulin domain-containing protein 2 isoform 1 precursor [Homo sapiens];gi|815891046|ref|NP_001295161.1|//transmembrane and immunoglobulin domain-containing protein 2 isoform 3 [Homo sapiens];gi|281306840|ref|NP_001162597.1|//transmembrane and imm…
10398	1149	2175.61	3216.9	0.564252	6.69e-38	*	4.41e-40	MYL9	GO:0005859//muscle myosin complex;GO:0001725//stress fiber;GO:0030018//Z disc;GO:0005829//cytosol	GO:0005509//calcium ion binding;GO:0008307//structural constituent of muscle;GO:0032036//myosin heavy chain binding	GO:0006937//regulation of muscle contraction;GO:0007411//axon guidance	K12757//myosin regulatory light chain 12;K12755//myosin regulatory light chain 9	gi|31563524|ref|NP_852667.1|//myosin regulatory light polypeptide 9 isoform b [Homo sapiens];gi|431894354|gb|ELK04154.1|//Myosin regulatory light polypeptide 9 [Pteropus alecto]
4616	1395	274.99	406.04	0.562242	2.95e-07	*	2.59e-08	GADD45B	GO:0005634//nucleus;GO:0005737//cytoplasm	GO:0005515//protein binding	GO:0030154//cell differentiation;GO:0006950//response to stress;GO:0006915//apoptotic process;GO:0006469//negative regulation of protein kinase activity;GO:0000185//activation of MAPKKK activity;GO:0007275//multicellular organismal development;GO:0051726//regulation of cell cycle;GO:0000186//activation of MAPKK activity	K04402//growth arrest and DNA-damage-inducible protein	gi|86991436|ref|NP_056490.2|//growth arrest and DNA damage-inducible protein GADD45 beta [Homo sapiens];gi|795238149|ref|XP_011852833.1|//PREDICTED: growth arrest and DNA damage-inducible protein GADD45 beta isoform X2 [Mandrillus leucophaeus]
94115	904	11.9393	17.6278	0.562126	0.283219	*	0.124952	CGB8	GO:0005576//extracellular region	GO:0005179//hormone activity	GO:0016486//peptide hormone processing;GO:0007165//signal transduction;GO:0034641//cellular nitrogen compound metabolic process;GO:0007267//cell-cell signaling;GO:0007292//female gamete generation;GO:0006915//apoptotic process;GO:0044281//small molecule metabolic process	K10045//chorionic gonadotropin, beta polypeptide	gi|4502789|ref|NP_000728.1|//choriogonadotropin subunit beta precursor [Homo sapiens]
100131378	1004	19.3092	28.5054	0.561941	0.207827	*	0.0835209	C11orf91	NA	NA	NA	NA	gi|262359907|ref|NP_001160164.1|//uncharacterized protein C11orf91 [Homo sapiens]
401934	2097	24.5638	36.2529	0.56156	0.142761	*	0.0521506	RNF223	GO:0016021//integral component of membrane	GO:0008270//zinc ion binding	NA	K11997//tripartite motif-containing protein 2/3;K02156//aubergine;K11983//E3 ubiquitin-protein ligase RNF182 [EC:2.3.2.27]	gi|327412333|ref|NP_001192181.1|//RING finger protein 223 [Homo sapiens]
4232	2279	6.58273	9.71129	0.560977	0.352956	*	0.165842	MEST	GO:0070062//extracellular vesicular exosome;GO:0016021//integral component of membrane;GO:0005789//endoplasmic reticulum membrane	GO:0016787//hydrolase activity	GO:0007498//mesoderm development;GO:0010883//regulation of lipid storage;GO:0032526//response to retinoic acid	NA	gi|29294639|ref|NP_002393.2|//mesoderm-specific transcript homolog protein isoform a [Homo sapiens];gi|359806886|ref|NP_001240829.1|//mesoderm-specific transcript homolog protein isoform c [Homo sapiens] ;gi|359806892|ref|NP_001240830.1|//mesoderm-specific transcript homolog protein isoform d precursor [Homo sapiens];gi|426357910|ref|XP_004046272.1|//PREDICTED: mesoderm-specific transcript homolo…
56920	4700	10.2015	15.0486	0.560849	0.295908	*	0.131991	SEMA3G	GO:0070062//extracellular vesicular exosome;GO:0005615//extracellular space	GO:0030215//semaphorin receptor binding;GO:0045499//chemorepellent activity;GO:0038191//neuropilin binding	GO:0007275//multicellular organismal development	K06840//semaphorin 3	gi|9910362|ref|NP_064548.1|//semaphorin-3G precursor [Homo sapiens]
54596	3894	3.89384	5.74375	0.5608	0.373357	*	0.179351	L1TD1	GO:0030529//ribonucleoprotein complex	GO:0003727//single-stranded RNA binding	NA	NA	gi|157694505|ref|NP_061952.3|//LINE-1 type transposase domain-containing protein 1 [Homo sapiens]
2835	4447	1.88117	2.77424	0.560466	0.328263	*	0.151023	GPR12	GO:0005887//integral component of plasma membrane	GO:0031210//phosphatidylcholine binding;GO:0004930//G-protein coupled receptor activity	GO:0007186//G-protein coupled receptor signaling pathway;GO:0006874//cellular calcium ion homeostasis	K04315//G protein-coupled receptor 12	gi|4885295|ref|NP_005279.1|//G-protein coupled receptor 12 [Homo sapiens]
5042	2430	1.87843	2.76916	0.559923	0.327936	*	0.150795	PABPC3	GO:0070062//extracellular vesicular exosome;GO:0005737//cytoplasm	GO:0008143//poly(A) binding;GO:0000166//nucleotide binding	GO:0016071//mRNA metabolic process	K13126//polyadenylate-binding protein	gi|45238849|ref|NP_112241.2|//polyadenylate-binding protein 3 [Homo sapiens]
255809	1322	6.5744	9.68977	0.559603	0.35515	*	0.167674	C19orf38	GO:0016021//integral component of membrane	NA	NA	K09228//KRAB domain-containing zinc finger protein	gi|210147581|ref|NP_001129954.1|//protein HIDE1 precursor [Homo sapiens]
9127	2526	42.1958	62.1892	0.559566	0.0513514	*	0.0155631	P2RX6	GO:0005887//integral component of plasma membrane;GO:0030054//cell junction;GO:0005639//integral component of nuclear inner membrane;GO:0043197//dendritic spine;GO:0005737//cytoplasm;GO:0014069//postsynaptic density;GO:0043025//neuronal cell body	GO:0004931//extracellular ATP-gated cation channel activity;GO:0005524//ATP binding;GO:0042802//identical protein binding;GO:0001614//purinergic nucleotide receptor activity	GO:0051291//protein heterooligomerization;GO:0006936//muscle contraction;GO:0006812//cation transport;GO:0035590//purinergic nucleotide receptor signaling pathway;GO:0051260//protein homooligomerization	K05221//P2X purinoceptor 6	gi|2350847|dbj|BAA22046.1|//HUMAN P2XM [Homo sapiens];gi|768026338|ref|XP_011528800.1|//PREDICTED: P2X purinoceptor 6 isoform X1 [Homo sapiens];gi|768026346|ref|XP_011528801.1|//PREDICTED: P2X purinoceptor 6 isoform X2 [Homo sapiens];gi|768026349|ref|XP_011528802.1|//PREDICTED: P2X purinoceptor 6 isoform X3 [Homo sapiens];gi|694981958|ref|XP_009436126.1|//PREDICTED: P2X purinoceptor 6 isoform X3 …
50813	1897	977.8	1440.77	0.559228	3.89e-21	*	7.36e-23	COPS7A	GO:0005654//nucleoplasm;GO:0008180//COP9 signalosome;GO:0005737//cytoplasm	GO:0005515//protein binding	NA	K12180//COP9 signalosome complex subunit 7	gi|7705330|ref|NP_057403.1|//COP9 signalosome complex subunit 7a [Homo sapiens]
57535	6076	94.8302	139.702	0.558936	0.00456138	*	0.000973435	KIAA1324	NA	NA	NA	NA	gi|388490233|ref|NP_001253977.1|//UPF0577 protein KIAA1324 isoform 2 [Homo sapiens];gi|547235630|ref|NP_001271281.1|//UPF0577 protein KIAA1324 isoform 4 [Homo sapiens];gi|38569482|ref|NP_065826.2|//UPF0577 protein KIAA1324 isoform 1 [Homo sapiens];gi|767905245|ref|XP_011540129.1|//PREDICTED: UPF0577 protein KIAA1324 isoform X3 [Homo sapiens];gi|767905241|ref|XP_011540127.1|//PREDICTED: UPF0577 pr…
646588	1333	5.91359	8.70899	0.55847	0.363901	*	0.173361	LOC646588	NA	NA	NA	NA	gi|767886906|ref|XP_011547392.1|//PREDICTED: uncharacterized protein LOC646588 [Homo sapiens];gi|821022452|ref|XP_012352188.1|//PREDICTED: uncharacterized protein LOC105737767 isoform X2 [Nomascus leucogenys]
7096	4647	15.86	23.3435	0.557626	0.224755	*	0.0924589	TLR1	GO:0005887//integral component of plasma membrane;GO:0045121//membrane raft;GO:0005794//Golgi apparatus;GO:0035354//Toll-like receptor 1-Toll-like receptor 2 protein complex;GO:0030670//phagocytic vesicle membrane	GO:0035663//Toll-like receptor 2 binding;GO:0071723//lipopeptide binding;GO:0004888//transmembrane signaling receptor activity;GO:0046982//protein heterodimerization activity	GO:0045410//positive regulation of interleukin-6 biosynthetic process;GO:0034130//toll-like receptor 1 signaling pathway;GO:0042116//macrophage activation;GO:0071727//cellular response to triacyl bacterial lipopeptide;GO:0034150//toll-like receptor 6 signaling pathway;GO:0006954//inflammatory response;GO:0042535//positive regulation of tumor necrosis factor biosynthetic process;GO:0050707//regula…	K05398//toll-like receptor 1	gi|41350337|ref|NP_003254.2|//toll-like receptor 1 precursor [Homo sapiens]
7857	2586	31.1954	45.883	0.556627	0.103228	*	0.035392	SCG2	GO:0000784//nuclear chromosome, telomeric region;GO:0005615//extracellular space;GO:0016363//nuclear matrix;GO:0000790//nuclear chromatin;GO:0035097//histone methyltransferase complex;GO:0032154//cleavage furrow;GO:0005829//cytosol;GO:0031045//dense core granule	GO:0005125//cytokine activity;GO:0030674//protein binding, bridging;GO:0047485//protein N-terminus binding;GO:0003690//double-stranded DNA binding;GO:0044212//transcription regulatory region DNA binding;GO:0003682//chromatin binding;GO:0070412//R-SMAD binding;GO:0000403//Y-form DNA binding;GO:0042056//chemoattractant activity;GO:0000400//four-way junction DNA binding;GO:0018024//histone-lysine N-…	GO:0031062//positive regulation of histone methylation;GO:0006338//chromatin remodeling;GO:0050930//induction of positive chemotaxis;GO:0060135//maternal process involved in female pregnancy;GO:0043433//negative regulation of sequence-specific DNA binding transcription factor activity;GO:0007420//brain development;GO:0010332//response to gamma radiation;GO:0032092//positive regulation of protein …	NA	gi|68160947|ref|NP_003460.2|//secretogranin-2 precursor [Homo sapiens]
57127	1941	8.08413	11.8898	0.556564	0.354259	*	0.166917	RHBG	GO:0016323//basolateral plasma membrane;GO:0005887//integral component of plasma membrane;GO:0014731//spectrin-associated cytoskeleton;GO:0046658//anchored component of plasma membrane;GO:0030659//cytoplasmic vesicle membrane	GO:0008519//ammonium transmembrane transporter activity;GO:0030506//ankyrin binding	GO:0070634//transepithelial ammonium transport;GO:0072488//ammonium transmembrane transport	K06580//ammonium transporter Rh	gi|224548945|ref|NP_065140.3|//ammonium transporter Rh type B isoform a [Homo sapiens];gi|209572666|sp|Q9H310.2|RHBG_HUMAN//RecName: Full=Ammonium transporter Rh type B; AltName: Full=Rhesus blood group family type B glycoprotein; Short=Rh family type B glycoprotein; Short=Rh type B glycoprotein;gi|767909955|ref|XP_011508096.1|//PREDICTED: ammonium transporter Rh type B isoform X2 [Homo sapiens];…
285513	12762	3.909	5.74763	0.55617	0.378815	*	0.182941	GPRIN3	NA	NA	NA	NA	gi|112821690|ref|NP_938022.2|//G protein-regulated inducer of neurite outgrowth 3 [Homo sapiens]
2825	2168	117.189	172.297	0.556052	0.00137718	*	0.000255304	GPR1	GO:0005887//integral component of plasma membrane;GO:0043005//neuron projection	GO:0005515//protein binding;GO:0042923//neuropeptide binding;GO:0004930//G-protein coupled receptor activity	GO:0007186//G-protein coupled receptor signaling pathway	K04310//G protein-coupled receptor 1	gi|36951012|ref|NP_005270.2|//G-protein coupled receptor 1 [Homo sapiens]
3589	2381	32.1716	47.2721	0.555202	0.0912182	*	0.0306083	IL11	GO:0005615//extracellular space;GO:0005737//cytoplasm	GO:0005142//interleukin-11 receptor binding;GO:0008083//growth factor activity;GO:0005125//cytokine activity	GO:0050731//positive regulation of peptidyl-tyrosine phosphorylation;GO:0030219//megakaryocyte differentiation;GO:0046888//negative regulation of hormone secretion;GO:0030168//platelet activation;GO:0045944//positive regulation of transcription from RNA polymerase II promoter;GO:0045444//fat cell differentiation;GO:0043410//positive regulation of MAPK cascade;GO:0033138//positive regulation of pe…	K05417//interleukin 11	gi|10834994|ref|NP_000632.1|//interleukin-11 isoform 1 precursor [Homo sapiens];gi|391353380|ref|NP_001254647.1|//interleukin-11 isoform 2 [Homo sapiens]
54854	2173	3.36029	4.93656	0.554921	0.371712	*	0.178252	FAM83E	NA	GO:0019901//protein kinase binding	NA	K16805//protein FAM83D;K19894//null	gi|768009693|ref|XP_011525351.1|//PREDICTED: protein FAM83E isoform X2 [Homo sapiens];gi|153251792|ref|NP_060178.2|//protein FAM83E [Homo sapiens]
147	2092	20.8748	30.6659	0.554878	0.176243	*	0.0678976	ADRA1B	GO:0031965//nuclear membrane;GO:0005887//integral component of plasma membrane	GO:0004937//alpha1-adrenergic receptor activity;GO:0046982//protein heterodimerization activity	GO:0008542//visual learning;GO:0045818//negative regulation of glycogen catabolic process;GO:0007512//adult heart development;GO:0043278//response to morphine;GO:0016049//cell growth;GO:0042593//glucose homeostasis;GO:0008283//cell proliferation;GO:0007188//adenylate cyclase-modulating G-protein coupled receptor signaling pathway;GO:0035265//organ growth;GO:0001996//positive regulation of heart r…	K04136//adrenergic receptor alpha-1B	gi|4501959|ref|NP_000670.1|//alpha-1B adrenergic receptor [Homo sapiens];gi|767938087|ref|XP_011532740.1|//PREDICTED: alpha-1B adrenergic receptor isoform X4 [Homo sapiens];gi|578811010|ref|XP_006714884.1|//PREDICTED: alpha-1B adrenergic receptor isoform X8 [Homo sapiens];gi|767938081|ref|XP_011532737.1|//PREDICTED: alpha-1B adrenergic receptor isoform X1 [Homo sapiens];gi|767938085|ref|XP_011532…
100287387	1056	13.8711	20.3772	0.554875	0.251651	*	0.107005	LOC100287387	NA	NA	NA	NA	gi|239741918|ref|XP_002342351.1|//PREDICTED: uncharacterized protein LOC100287387 [Homo sapiens]
728689	2090	432.449	635.192	0.554663	0.0732513	*	0.0235878	EIF3CL	GO:0016282//eukaryotic 43S preinitiation complex;GO:0071541//eukaryotic translation initiation factor 3 complex, eIF3m;GO:0005829//cytosol;GO:0033290//eukaryotic 48S preinitiation complex;GO:0005852//eukaryotic translation initiation factor 3 complex	GO:0003743//translation initiation factor activity;GO:0031369//translation initiation factor binding	GO:0006413//translational initiation	K03252//translation initiation factor 3 subunit C	gi|153791492|ref|NP_001093131.1|//eukaryotic translation initiation factor 3 subunit C-like protein [Homo sapiens]
55621	2144	1020.06	1498	0.554384	1.47e-15	*	4.62e-17	TRMT1	GO:0005654//nucleoplasm;GO:0005739//mitochondrion	GO:0004809//tRNA (guanine-N2-)-methyltransferase activity;GO:0046872//metal ion binding;GO:0005515//protein binding;GO:0005524//ATP binding;GO:0016783//sulfurtransferase activity;GO:0000049//tRNA binding	GO:0032259//methylation;GO:0008033//tRNA processing	K00555//tRNA (guanine26-N2/guanine27-N2)-dimethyltransferase [EC:2.1.1.215 2.1.1.216]	gi|768003080|ref|XP_011526426.1|//PREDICTED: tRNA (guanine(26)-N(2))-dimethyltransferase isoform X2 [Homo sapiens];gi|216548445|ref|NP_001136026.1|//tRNA (guanine(26)-N(2))-dimethyltransferase isoform 2 [Homo sapiens];gi|8923219|ref|NP_060192.1|//tRNA (guanine(26)-N(2))-dimethyltransferase isoform 1 [Homo sapiens]
25802	3967	2.55905	3.75683	0.553908	0.364286	*	0.17358	LMOD1	GO:0005865//striated muscle thin filament;GO:0016020//membrane;GO:0005829//cytosol	GO:0003779//actin binding;GO:0005523//tropomyosin binding	GO:0006936//muscle contraction	K10370//tropomodulin	gi|112380630|ref|NP_036266.2|//leiomodin-1 [Homo sapiens]
9526	1433	803.725	1179.41	0.553297	3.33e-16	*	9.7e-18	MPDU1	GO:0070062//extracellular vesicular exosome;GO:0005783//endoplasmic reticulum;GO:0016021//integral component of membrane;GO:0005739//mitochondrion;GO:0005789//endoplasmic reticulum membrane	GO:0005515//protein binding	GO:0006457//protein folding;GO:0006810//transport;GO:0009312//oligosaccharide biosynthetic process;GO:0006488//dolichol-linked oligosaccharide biosynthetic process	K09660//mannose-P-dolichol utilization defect 1	gi|116517313|ref|NP_004861.2|//mannose-P-dolichol utilization defect 1 protein [Homo sapiens];gi|119610568|gb|EAW90162.1|//mannose-P-dolichol utilization defect 1, isoform CRA_e [Homo sapiens]
100533952	858	3.90258	5.72648	0.553221	0.382057	*	0.185209	RBAK-RBAKDN	GO:0005634//nucleus	GO:0008270//zinc ion binding;GO:0003676//nucleic acid binding	GO:0045892//negative regulation of transcription, DNA-templated	K09228//KRAB domain-containing zinc finger protein	gi|325168189|ref|NP_001191442.1|//RBAK-RBAKDN readthrough [Homo sapiens]
10893	4323	124.747	183.032	0.553089	0.000648488	*	0.000110899	MMP24	GO:0070062//extracellular vesicular exosome;GO:0032588//trans-Golgi network membrane;GO:0005887//integral component of plasma membrane;GO:0005578//proteinaceous extracellular matrix	GO:0004222//metalloendopeptidase activity;GO:0005509//calcium ion binding;GO:0008270//zinc ion binding;GO:0008047//enzyme activator activity;GO:0045296//cadherin binding	GO:0006508//proteolysis;GO:0043085//positive regulation of catalytic activity	K08002//matrix metalloproteinase-24 (membrane-inserted) [EC:3.4.24.-]	gi|768015642|ref|XP_011526802.1|//PREDICTED: matrix metalloproteinase-24 isoform X1 [Homo sapiens];gi|795560588|ref|XP_011908043.1|//PREDICTED: matrix metalloproteinase-24 isoform X6 [Cercocebus atys];gi|5729929|ref|NP_006681.1|//matrix metalloproteinase-24 preproprotein [Homo sapiens]
9861	1375	956.453	1403.17	0.552919	1.23e-19	*	2.55e-21	PSMD6	GO:0070062//extracellular vesicular exosome;GO:0005654//nucleoplasm;GO:0005829//cytosol;GO:0005838//proteasome regulatory particle	GO:0005515//protein binding;GO:0016887//ATPase activity	GO:0006521//regulation of cellular amino acid metabolic process;GO:0016032//viral process;GO:0000084//mitotic S phase;GO:0051437//positive regulation of ubiquitin-protein ligase activity involved in mitotic cell cycle;GO:0051436//negative regulation of ubiquitin-protein ligase activity involved in mitotic cell cycle;GO:0010467//gene expression;GO:0002479//antigen processing and presentation of ex…	K03037//26S proteasome regulatory subunit N7	gi|422398841|ref|NP_001258709.1|//26S proteasome non-ATPase regulatory subunit 6 isoform 3 [Homo sapiens];gi|767924732|ref|XP_011532590.1|//PREDICTED: 26S proteasome non-ATPase regulatory subunit 6 isoform X2 [Homo sapiens];gi|422398845|ref|NP_001258710.1|//26S proteasome non-ATPase regulatory subunit 6 isoform 4 [Homo sapiens] ;gi|422398832|ref|NP_001258708.1|//26S proteasome non-ATPase regulato…
81569	1888	10.9203	16.015	0.552409	0.304823	*	0.137162	ACTL8	GO:0005856//cytoskeleton;GO:0005737//cytoplasm	GO:0005515//protein binding	NA	K05692//actin beta/gamma 1	gi|767906175|ref|XP_011540509.1|//PREDICTED: actin-like protein 8 isoform X2 [Homo sapiens]
107983990	1545	1.21093	1.7751	0.551786	0.265045	*	0.114494	LOC107983990	NA	NA	NA	NA	NA
10539	1358	1533.45	2246.46	0.550878	2.94e-28	*	2.97e-30	GLRX3	GO:0030425//dendrite;GO:0070062//extracellular vesicular exosome;GO:0005634//nucleus;GO:0005938//cell cortex;GO:0030018//Z disc	GO:0009055//electron carrier activity;GO:0015035//protein disulfide oxidoreductase activity;GO:0005080//protein kinase C binding;GO:0046872//metal ion binding;GO:0051536//iron-sulfur cluster binding	GO:0010614//negative regulation of cardiac muscle hypertrophy;GO:0002026//regulation of the force of heart contraction;GO:0045454//cell redox homeostasis	K07390//monothiol glutaredoxin;K15216//RNA polymerase I-specific transcription initiation factor RRN3	gi|95113651|ref|NP_006532.2|//glutaredoxin-3 [Homo sapiens];gi|48257132|gb|AAH14372.2|//GLRX3 protein, partial [Homo sapiens]
211	2294	1660.55	2427.04	0.547535	1.05e-31	*	8.92e-34	ALAS1	GO:0005759//mitochondrial matrix;GO:0005654//nucleoplasm	GO:0005515//protein binding;GO:0003870//5-aminolevulinate synthase activity;GO:0030170//pyridoxal phosphate binding	GO:0044255//cellular lipid metabolic process;GO:0006782//protoporphyrinogen IX biosynthetic process;GO:0044281//small molecule metabolic process	K00643//5-aminolevulinate synthase [EC:2.3.1.37]	gi|767922625|ref|XP_011531779.1|//PREDICTED: 5-aminolevulinate synthase, nonspecific, mitochondrial isoform X1 [Homo sapiens];gi|751130483|ref|NP_001291373.1|//5-aminolevulinate synthase, nonspecific, mitochondrial isoform 2 [Homo sapiens];gi|767922627|ref|XP_011531780.1|//PREDICTED: 5-aminolevulinate synthase, nonspecific, mitochondrial isoform X2 [Homo sapiens];gi|4502025|ref|NP_000679.1|//5-am…
26580	1534	791.777	1156.57	0.546686	1.54e-17	*	4.03e-19	BSCL2	GO:0030176//integral component of endoplasmic reticulum membrane;GO:0030529//ribonucleoprotein complex;GO:0019013//viral nucleocapsid	GO:0005515//protein binding	GO:0019915//lipid storage;GO:0050995//negative regulation of lipid catabolic process;GO:0045444//fat cell differentiation;GO:0008219//cell death;GO:0034389//lipid particle organization	K19365//seipin	gi|325974509|ref|NP_001124174.2|//seipin isoform 3 [Homo sapiens];gi|171906569|ref|NP_001116427.1|//seipin isoform 1 [Homo sapiens];gi|40068505|ref|NP_116056.3|//seipin isoform 2 [Homo sapiens]
100533106	1542	70.2482	102.573	0.546115	0.0195809	*	0.00504145	ZHX1-C8orf76	NA	NA	NA	NA	gi|323510674|ref|NP_001191109.1|//zinc fingers and homeoboxes protein 1, isoform 2 [Homo sapiens]
123099	1417	0.943664	1.37703	0.545218	0.203664	*	0.0814204	DEGS2	GO:0016021//integral component of membrane;GO:0005789//endoplasmic reticulum membrane	GO:0042284//sphingolipid delta-4 desaturase activity;GO:0000170//sphingosine hydroxylase activity	GO:0006667//sphinganine metabolic process;GO:0006644//phospholipid metabolic process;GO:0006633//fatty acid biosynthetic process;GO:0046513//ceramide biosynthetic process	K04712//sphingolipid delta-4 desaturase [EC:1.14.-.-]	gi|207113139|ref|NP_996801.2|//sphingolipid delta(4)-desaturase/C4-monooxygenase DES2 [Homo sapiens]
57530	5114	23.9369	34.921	0.544859	0.17449	*	0.0670668	CGN	GO:0016459//myosin complex;GO:0005923//tight junction	GO:0003779//actin binding;GO:0003774//motor activity	GO:0007179//transforming growth factor beta receptor signaling pathway	K06102//cingulin	gi|16262452|ref|NP_065821.1|//cingulin [Homo sapiens]
2119	4102	214.817	313.137	0.543684	1.61e-05	*	1.92e-06	ETV5	NA	NA	NA	K15593//ets translocation variant 5	gi|795240801|ref|XP_011808761.1|//PREDICTED: ETS translocation variant 5 isoform X1 [Colobus angolensis palliatus]
5125	9538	2.16552	3.15542	0.543119	0.367173	*	0.175596	PCSK5	GO:0005615//extracellular space;GO:0030141//secretory granule;GO:0016021//integral component of membrane;GO:0005796//Golgi lumen	GO:0004252//serine-type endopeptidase activity;GO:0005515//protein binding;GO:0042277//peptide binding	GO:0009952//anterior/posterior pattern specification;GO:0001822//kidney development;GO:0007507//heart development;GO:0048011//neurotrophin TRK receptor signaling pathway;GO:0002001//renin secretion into blood stream;GO:0007267//cell-cell signaling;GO:0032455//nerve growth factor processing;GO:0030323//respiratory tube development;GO:0035108//limb morphogenesis;GO:0043043//peptide biosynthetic pro…	K08654//proprotein convertase subtilisin/kexin type 5 [EC:3.4.21.-]	gi|299523015|ref|NP_001177411.1|//proprotein convertase subtilisin/kexin type 5 isoform PC6B preproprotein [Homo sapiens];gi|767957654|ref|XP_011517071.1|//PREDICTED: proprotein convertase subtilisin/kexin type 5 isoform X2 [Homo sapiens];gi|20336246|ref|NP_006191.2|//proprotein convertase subtilisin/kexin type 5 isoform PC6A preproprotein [Homo sapiens];gi|530391219|ref|XP_005252096.1|//PREDICTE…
126129	2421	81.5348	118.792	0.54295	0.0160028	*	0.00399263	CPT1C	GO:0030424//axon;GO:0030425//dendrite;GO:0030054//cell junction;GO:0005741//mitochondrial outer membrane;GO:0005789//endoplasmic reticulum membrane;GO:0032281//alpha-amino-3-hydroxy-5-methyl-4-isoxazolepropionic acid selective glutamate receptor complex;GO:0045202//synapse	GO:0005515//protein binding;GO:0004095//carnitine O-palmitoyltransferase activity	GO:0006635//fatty acid beta-oxidation	K19524//carnitine O-palmitoyltransferase 1, brain isoform [EC:2.3.1.21]	gi|158260449|dbj|BAF82402.1|//unnamed protein product [Homo sapiens];gi|22748777|ref|NP_689572.1|//carnitine O-palmitoyltransferase 1, brain isoform isoform 2 [Homo sapiens];gi|209862905|ref|NP_001129524.1|//carnitine O-palmitoyltransferase 1, brain isoform isoform 1 [Homo sapiens];gi|768006431|ref|XP_011524742.1|//PREDICTED: carnitine O-palmitoyltransferase 1, brain isoform isoform X2 [Homo sapi…
54979	785	2.16425	3.15284	0.542784	0.367659	*	0.17585	HRASLS2	GO:0016021//integral component of membrane;GO:0005737//cytoplasm	GO:0016746//transferase activity, transferring acyl groups;GO:0016787//hydrolase activity	GO:0016042//lipid catabolic process	K16817//HRAS-like suppressor 3 [EC:3.1.1.32 3.1.1.4]	gi|767968399|ref|XP_011543421.1|//PREDICTED: HRAS-like suppressor 2 isoform X1 [Homo sapiens];gi|8923526|ref|NP_060348.1|//HRAS-like suppressor 2 [Homo sapiens]
728	2302	363.715	529.083	0.540683	4.76e-08	*	3.76e-09	C5AR1	GO:0016323//basolateral plasma membrane;GO:0009986//cell surface;GO:0005887//integral component of plasma membrane;GO:0005829//cytosol;GO:0045177//apical part of cell	GO:0001856//complement component C5a binding;GO:0004878//complement component C5a receptor activity	GO:0031100//organ regeneration;GO:0032494//response to peptidoglycan;GO:0032496//response to lipopolysaccharide;GO:0042789//mRNA transcription from RNA polymerase II promoter;GO:0021534//cell proliferation in hindbrain;GO:0050830//defense response to Gram-positive bacterium;GO:0000187//activation of MAPK activity;GO:0030593//neutrophil chemotaxis;GO:0043524//negative regulation of neuron apoptoti…	K04010//C5a anaphylatoxin chemotactic receptor	gi|4502509|ref|NP_001727.1|//C5a anaphylatoxin chemotactic receptor 1 [Homo sapiens]
5581	5603	133.414	194.015	0.540257	0.000596486	*	0.000101227	PRKCE	GO:0005856//cytoskeleton;GO:0005634//nucleus;GO:0005783//endoplasmic reticulum;GO:0048471//perinuclear region of cytoplasm;GO:0005829//cytosol;GO:0005794//Golgi apparatus;GO:0005739//mitochondrion;GO:0005886//plasma membrane	GO:0030546//receptor activator activity;GO:0005524//ATP binding;GO:0003785//actin monomer binding;GO:0035276//ethanol binding;GO:0071889//14-3-3 protein binding;GO:0046872//metal ion binding;GO:0004699//calcium-independent protein kinase C activity;GO:0004871//signal transducer activity;GO:0019899//enzyme binding;GO:0008047//enzyme activator activity	GO:0010763//positive regulation of fibroblast migration;GO:0071456//cellular response to hypoxia;GO:0032024//positive regulation of insulin secretion;GO:0070257//positive regulation of mucus secretion;GO:0048011//neurotrophin TRK receptor signaling pathway;GO:0043278//response to morphine;GO:2001031//positive regulation of cellular glucuronidation;GO:0030168//platelet activation;GO:0050730//regul…	K18050//novel protein kinase C epsilon type [EC:2.7.11.13]	gi|767914891|ref|XP_011531285.1|//PREDICTED: protein kinase C epsilon type isoform X10 [Homo sapiens];gi|767914862|ref|XP_011531272.1|//PREDICTED: protein kinase C epsilon type isoform X2 [Homo sapiens];gi|4885563|ref|NP_005391.1|//protein kinase C epsilon type [Homo sapiens];gi|724828304|ref|XP_010362610.1|//PREDICTED: protein kinase C epsilon type isoform X1 [Rhinopithecus roxellana];gi|7679148…
389125	742	6.91454	10.0542	0.540097	0.376842	*	0.181742	MUSTN1	GO:0005634//nucleus	NA	GO:0030326//embryonic limb morphogenesis;GO:0042246//tissue regeneration	NA	gi|312176412|ref|NP_995325.3|//musculoskeletal embryonic nuclear protein 1 [Homo sapiens]
338773	2776	40.9129	59.4538	0.539214	0.0838924	*	0.0277466	TMEM119	GO:0016021//integral component of membrane;GO:0005789//endoplasmic reticulum membrane;GO:0005886//plasma membrane	NA	GO:0001649//osteoblast differentiation	NA	gi|194097411|ref|NP_859075.2|//transmembrane protein 119 precursor [Homo sapiens]
164656	2887	2.16472	3.14515	0.53895	0.371439	*	0.178077	TMPRSS6	GO:0005615//extracellular space;GO:0005622//intracellular;GO:0016021//integral component of membrane;GO:0005886//plasma membrane	GO:0004252//serine-type endopeptidase activity;GO:0005515//protein binding	GO:0042730//fibrinolysis;GO:0055072//iron ion homeostasis;GO:0001525//angiogenesis;GO:0006508//proteolysis;GO:0030198//extracellular matrix organization;GO:0035556//intracellular signal transduction	K09637//transmembrane protease, serine 6 [EC:3.4.21.-]	gi|23957702|ref|NP_705837.1|//transmembrane protease serine 6 isoform 2 [Homo sapiens];gi|768023868|ref|XP_011528291.1|//PREDICTED: transmembrane protease serine 6 isoform X3 [Homo sapiens];gi|573014826|ref|NP_001275929.1|//transmembrane protease serine 6 isoform 1 [Homo sapiens]
6545	2323	1.49048	2.16535	0.538823	0.325119	*	0.149133	SLC7A4	GO:0005887//integral component of plasma membrane	GO:0015174//basic amino acid transmembrane transporter activity;GO:0015179//L-amino acid transmembrane transporter activity;GO:0015297//antiporter activity	GO:0015802//basic amino acid transport;GO:0006520//cellular amino acid metabolic process	K13866//solute carrier family 7 (cationic amino acid transporter), member 4	gi|110347453|ref|NP_004164.2|//cationic amino acid transporter 4 [Homo sapiens]
6609	2484	349.47	507.674	0.538734	8.72e-08	*	7.16e-09	SMPD1	GO:0005768//endosome;GO:0070062//extracellular vesicular exosome;GO:0005615//extracellular space;GO:0042599//lamellar body;GO:0016021//integral component of membrane;GO:0043202//lysosomal lumen;GO:0005886//plasma membrane	GO:0005515//protein binding;GO:0061750//null;GO:0008270//zinc ion binding;GO:0016798//hydrolase activity, acting on glycosyl bonds	GO:0006685//sphingomyelin catabolic process;GO:0007399//nervous system development;GO:0042493//response to drug;GO:0043407//negative regulation of MAP kinase activity;GO:0035307//positive regulation of protein dephosphorylation;GO:0006687//glycosphingolipid metabolic process;GO:0043065//positive regulation of apoptotic process;GO:0023021//termination of signal transduction;GO:0042220//response to…	K12350//sphingomyelin phosphodiesterase [EC:3.1.4.12]	gi|969812494|ref|NP_001305016.1|//sphingomyelin phosphodiesterase isoform 3 precursor [Homo sapiens];gi|300795589|ref|NP_001007594.2|//sphingomyelin phosphodiesterase isoform 2 precursor [Homo sapiens];gi|119589133|gb|EAW68727.1|//sphingomyelin phosphodiesterase 1, acid lysosomal (acid sphingomyelinase), isoform CRA_b [Homo sapiens];gi|767966367|ref|XP_011518606.1|//PREDICTED: sphingomyelin phosp…
84667	1757	373.829	542.723	0.537838	7.36e-08	*	5.97e-09	HES7	GO:0005634//nucleus	GO:0003677//DNA binding;GO:0008134//transcription factor binding;GO:0046983//protein dimerization activity	GO:0000122//negative regulation of transcription from RNA polymerase II promoter;GO:0007498//mesoderm development;GO:0001756//somitogenesis;GO:0007219//Notch signaling pathway;GO:0001501//skeletal system development;GO:0048511//rhythmic process;GO:0036342//post-anal tail morphogenesis	K09087//hairy and enhancer of split 2/6/7	gi|767992610|ref|XP_011522340.1|//PREDICTED: transcription factor HES-7 isoform X1 [Homo sapiens];gi|145207994|ref|NP_115969.2|//transcription factor HES-7 isoform 2 [Homo sapiens];gi|767992616|ref|XP_011522343.1|//PREDICTED: transcription factor HES-7 isoform X3 [Homo sapiens]
56954	1271	1173.11	1702.61	0.537406	6.8e-20	*	1.37e-21	NIT2	GO:0070062//extracellular vesicular exosome;GO:0005813//centrosome;GO:0005739//mitochondrion	GO:0050152//omega-amidase activity	GO:0006807//nitrogen compound metabolic process	K13566//omega-amidase [EC:3.5.1.3]	gi|9910460|ref|NP_064587.1|//omega-amidase NIT2 [Homo sapiens]
56985	1227	102.074	148.134	0.537291	0.00404346	*	0.00084946	ADPRM	GO:0005829//cytosol;GO:0016021//integral component of membrane	GO:0046872//metal ion binding;GO:0047631//ADP-ribose diphosphatase activity;GO:0047734//CDP-glycerol diphosphatase activity	NA	K01517//manganese-dependent ADP-ribose/CDP-alcohol diphosphatase [EC:3.6.1.13 3.6.1.16 3.6.1.53]	gi|94158594|ref|NP_064618.3|//manganese-dependent ADP-ribose/CDP-alcohol diphosphatase [Homo sapiens]
162979	1604	39.892	57.8541	0.53632	0.0827678	*	0.0273304	ZNF296	GO:0005634//nucleus	GO:0003677//DNA binding;GO:0046872//metal ion binding;GO:0001076//RNA polymerase II transcription factor binding transcription factor activity	GO:0006355//regulation of transcription, DNA-templated;GO:0007283//spermatogenesis	K09228//KRAB domain-containing zinc finger protein	gi|21687252|ref|NP_660331.1|//zinc finger protein 296 [Homo sapiens]
55630	741	21.1629	30.6842	0.535956	0.192785	*	0.0762281	SLC39A4	GO:0070062//extracellular vesicular exosome;GO:0055038//recycling endosome membrane;GO:0005887//integral component of plasma membrane;GO:0016324//apical plasma membrane	GO:0005385//zinc ion transmembrane transporter activity	GO:0034224//cellular response to zinc ion starvation;GO:0055085//transmembrane transport;GO:0006882//cellular zinc ion homeostasis	K14710//solute carrier family 39 (zinc transporter), member 4	gi|578816072|ref|XP_006716662.1|//PREDICTED: zinc transporter ZIP4 isoform X1 [Homo sapiens];gi|115430255|ref|NP_570901.2|//zinc transporter ZIP4 isoform 2 precursor [Homo sapiens];gi|115430259|ref|NP_060237.2|//zinc transporter ZIP4 isoform 1 [Homo sapiens];gi|525507373|ref|NP_001267486.1|//zinc transporter ZIP4 isoform 3 [Homo sapiens]
51207	1317	5.56729	8.06971	0.53554	0.396395	*	0.194817	DUSP13	GO:0016021//integral component of membrane;GO:0005737//cytoplasm	GO:0005515//protein binding;GO:0008138//protein tyrosine/serine/threonine phosphatase activity;GO:0004725//protein tyrosine phosphatase activity	GO:0006470//protein dephosphorylation;GO:0007283//spermatogenesis	K14165//atypical dual specificity phosphatase [EC:3.1.3.16 3.1.3.48]	gi|767963026|ref|XP_011538155.1|//PREDICTED: dual specificity protein phosphatase 13 isoform X5 [Homo sapiens];gi|56117818|ref|NP_001007272.1|//dual specificity protein phosphatase 13 isoform 1 [Homo sapiens];gi|795518695|ref|XP_011713005.1|//PREDICTED: dual specificity protein phosphatase 13 isoform X6 [Macaca nemestrina];gi|56237018|ref|NP_057448.3|//dual specificity protein phosphatase 13 isof…
84306	1174	280.896	407.018	0.535056	8.85e-07	*	8.58e-08	PDCD2L	GO:0016020//membrane;GO:0005737//cytoplasm	NA	GO:0007049//cell cycle	K14801//pre-rRNA-processing protein TSR4	gi|14150141|ref|NP_115722.1|//programmed cell death protein 2-like [Homo sapiens]
3778	1216	1.49396	2.16409	0.534617	0.32886	*	0.151337	KCNMA1	GO:0070062//extracellular vesicular exosome;GO:0005901//caveola;GO:0016324//apical plasma membrane;GO:0008076//voltage-gated potassium channel complex	GO:0003779//actin binding;GO:0005249//voltage-gated potassium channel activity;GO:0046872//metal ion binding;GO:0060072//large conductance calcium-activated potassium channel activity	GO:0007596//blood coagulation;GO:0046541//saliva secretion;GO:0006970//response to osmotic stress;GO:0034465//response to carbon monoxide;GO:0051260//protein homooligomerization;GO:0060087//relaxation of vascular smooth muscle;GO:0060083//smooth muscle contraction involved in micturition;GO:0043065//positive regulation of apoptotic process;GO:0019228//neuronal action potential;GO:0030007//cellula…	K04936//potassium large conductance calcium-activated channel subfamily M alpha member 1	gi|767962826|ref|XP_011538084.1|//PREDICTED: calcium-activated potassium channel subunit alpha-1 isoform X12 [Homo sapiens];gi|767962828|ref|XP_011538085.1|//PREDICTED: calcium-activated potassium channel subunit alpha-1 isoform X13 [Homo sapiens];gi|767962822|ref|XP_011538082.1|//PREDICTED: calcium-activated potassium channel subunit alpha-1 isoform X8 [Homo sapiens];gi|408358011|ref|NP_00125845…
6988	2172	134.428	194.573	0.533478	0.00121316	*	0.000221654	TCTA	GO:0016021//integral component of membrane	NA	NA	NA	gi|11560141|ref|NP_071503.1|//T-cell leukemia translocation-altered gene protein [Homo sapiens]
100288797	3892	6.24811	9.04146	0.533137	0.395135	*	0.193919	TMEM239	GO:0016021//integral component of membrane	GO:0005515//protein binding	NA	NA	gi|768013189|ref|XP_011527430.1|//PREDICTED: transmembrane protein 239 isoform X3 [Homo sapiens];gi|266454992|ref|NP_001161142.1|//transmembrane protein 239 isoform 2 [Homo sapiens];gi|970598230|ref|NP_001305136.1|//transmembrane protein 239 isoform 1 [Homo sapiens]
1263	2513	130.201	188.339	0.532592	0.00125941	*	0.000230628	PLK3	GO:0005795//Golgi stack;GO:0030425//dendrite;GO:0005654//nucleoplasm;GO:0005730//nucleolus;GO:0005813//centrosome;GO:0043025//neuronal cell body	GO:0004674//protein serine/threonine kinase activity;GO:0005524//ATP binding;GO:0002039//p53 binding	GO:0006970//response to osmotic stress;GO:0043491//protein kinase B signaling;GO:0000302//response to reactive oxygen species;GO:0000122//negative regulation of transcription from RNA polymerase II promoter;GO:0007113//endomitotic cell cycle;GO:0006974//cellular response to DNA damage stimulus;GO:0090166//Golgi disassembly;GO:2000777//positive regulation of proteasomal ubiquitin-dependent protein…	K08862//polo-like kinase 3 [EC:2.7.11.21]	gi|41872374|ref|NP_004064.2|//serine/threonine-protein kinase PLK3 [Homo sapiens]
60490	2190	252.558	365.215	0.532128	3.96e-06	*	4.26e-07	PPCDC	GO:0005829//cytosol	GO:0005515//protein binding;GO:0004633//phosphopantothenoylcysteine decarboxylase activity	GO:0015939//pantothenate metabolic process;GO:0015937//coenzyme A biosynthetic process	K01598//phosphopantothenoylcysteine decarboxylase [EC:4.1.1.36]	gi|666875839|ref|NP_001288031.1|//phosphopantothenoylcysteine decarboxylase isoform c [Homo sapiens];gi|666875837|ref|NP_001288030.1|//phosphopantothenoylcysteine decarboxylase isoform b [Homo sapiens];gi|666875818|ref|NP_001288034.1|//phosphopantothenoylcysteine decarboxylase isoform e [Homo sapiens];gi|666875806|ref|NP_001288032.1|//phosphopantothenoylcysteine decarboxylase isoform d [Homo sapi…
56253	1923	3.93597	5.68965	0.531621	0.408019	*	0.202326	CRTAM	GO:0005887//integral component of plasma membrane;GO:0005913//cell-cell adherens junction	GO:0050839//cell adhesion molecule binding;GO:0004872//receptor activity;GO:0005102//receptor binding;GO:0042803//protein homodimerization activity	GO:0001913//T cell mediated cytotoxicity;GO:0050798//activated T cell proliferation;GO:0002860//positive regulation of natural killer cell mediated cytotoxicity directed against tumor cell target;GO:0008037//cell recognition;GO:0050715//positive regulation of cytokine secretion;GO:0002355//detection of tumor cell	K16361//cytotoxic and regulatory T-cell molecule	gi|51593098|ref|NP_062550.2|//cytotoxic and regulatory T-cell molecule Isoform 1 precursor [Homo sapiens];gi|62089246|dbj|BAD93067.1|//class-I MHC-restricted T cell associated molecule variant [Homo sapiens];gi|767970371|ref|XP_011541202.1|//PREDICTED: cytotoxic and regulatory T-cell molecule isoform X1 [Homo sapiens]
11047	1488	2991.58	4324.24	0.531537	1e-46	*	4.75e-49	ADRM1	GO:0005654//nucleoplasm;GO:0000502//proteasome complex;GO:0005887//integral component of plasma membrane;GO:0005737//cytoplasm;GO:0005886//plasma membrane	GO:0002020//protease binding;GO:0061133//endopeptidase activator activity;GO:0070628//proteasome binding	GO:0006368//transcription elongation from RNA polymerase II promoter;GO:0043248//proteasome assembly;GO:0010950//positive regulation of endopeptidase activity	K20174//null	gi|685565508|ref|XP_009214065.1|//PREDICTED: proteasomal ubiquitin receptor ADRM1 isoform X1 [Papio anubis];gi|527122034|ref|NP_001268366.1|//proteasomal ubiquitin receptor ADRM1 isoform 2 [Homo sapiens];gi|768015658|ref|XP_011526805.1|//PREDICTED: proteasomal ubiquitin receptor ADRM1 isoform X2 [Homo sapiens];gi|28373192|ref|NP_008933.2|//proteasomal ubiquitin receptor ADRM1 isoform 1 [Homo sapi…
6005	1953	0.815373	1.17848	0.531396	0.215017	*	0.0874698	RHAG	GO:0005887//integral component of plasma membrane	GO:0008519//ammonium transmembrane transporter activity;GO:0035379//carbon dioxide transmembrane transporter activity;GO:0030506//ankyrin binding	GO:0015701//bicarbonate transport;GO:0072488//ammonium transmembrane transport;GO:0015670//carbon dioxide transport;GO:0006873//cellular ion homeostasis;GO:0044281//small molecule metabolic process	K06580//ammonium transporter Rh	gi|156627565|ref|NP_000315.2|//ammonium transporter Rh type A [Homo sapiens];gi|767940461|ref|XP_011513090.1|//PREDICTED: ammonium transporter Rh type A isoform X1 [Homo sapiens]
389799	1740	0.815373	1.17848	0.531396	0.215017	*	0.0874698	CFAP77	NA	GO:0005515//protein binding	NA	NA	gi|46409466|ref|NP_997300.1|//uncharacterized protein C9orf171 isoform 1 [Homo sapiens];gi|767957409|ref|XP_011516973.1|//PREDICTED: uncharacterized protein C9orf171 isoform X2 [Homo sapiens];gi|767957407|ref|XP_011516972.1|//PREDICTED: uncharacterized protein C9orf171 isoform X1 [Homo sapiens];gi|545479136|ref|NP_001269886.1|//uncharacterized protein C9orf171 isoform 2 [Homo sapiens]
2819	3083	54.5268	78.8017	0.531261	0.040873	*	0.0119238	GPD1	GO:0070062//extracellular vesicular exosome;GO:0009331//glycerol-3-phosphate dehydrogenase complex;GO:0005829//cytosol;GO:0005739//mitochondrion	GO:0051287//NAD binding;GO:0004367//glycerol-3-phosphate dehydrogenase [NAD+] activity;GO:0004368//glycerol-3-phosphate dehydrogenase activity;GO:0042803//protein homodimerization activity	GO:0006094//gluconeogenesis;GO:0046168//glycerol-3-phosphate catabolic process;GO:0006116//NADH oxidation;GO:0071356//cellular response to tumor necrosis factor;GO:0019432//triglyceride biosynthetic process;GO:0071320//cellular response to cAMP;GO:0006654//phosphatidic acid biosynthetic process	K00006//glycerol-3-phosphate dehydrogenase (NAD+) [EC:1.1.1.8]	gi|380714668|ref|NP_001244128.1|//glycerol-3-phosphate dehydrogenase [NAD(+)], cytoplasmic isoform 2 [Homo sapiens];gi|33695088|ref|NP_005267.2|//glycerol-3-phosphate dehydrogenase [NAD(+)], cytoplasmic isoform 1 [Homo sapiens]
79745	3609	43.51	62.8774	0.531196	0.0677618	*	0.0214861	CLIP4	GO:0016021//integral component of membrane	GO:0005515//protein binding	NA	K10423//CAP-Gly domain-containing linker protein 3/4	gi|578803176|ref|XP_006712168.1|//PREDICTED: CAP-Gly domain-containing linker protein 4 isoform X4 [Homo sapiens];gi|31982881|ref|NP_078968.3|//CAP-Gly domain-containing linker protein 4 isoform 1 [Homo sapiens];gi|62630153|gb|AAX88898.1|//unknown [Homo sapiens]
64080	1283	114.457	165.384	0.531014	0.00292955	*	0.000592833	RBKS	GO:0070062//extracellular vesicular exosome;GO:0005634//nucleus;GO:0005737//cytoplasm	GO:0046872//metal ion binding;GO:0005515//protein binding;GO:0005524//ATP binding;GO:0004747//ribokinase activity	GO:0019303//D-ribose catabolic process	K00852//ribokinase [EC:2.7.1.15]	gi|11545855|ref|NP_071411.1|//ribokinase isoform 1 [Homo sapiens];gi|90109689|pdb|2FV7|A//Chain A, Crystal Structure Of Human Ribokinase
199746	741	36.1687	52.2453	0.530559	0.10306	*	0.0353224	U2AF1L4	GO:0005681//spliceosomal complex;GO:0089701//U2AF;GO:0016607//nuclear speck;GO:0005737//cytoplasm	GO:0003723//RNA binding;GO:0046872//metal ion binding;GO:0000166//nucleotide binding	NA	K12836//splicing factor U2AF 35 kDa subunit	gi|94536807|ref|NP_659424.2|//splicing factor U2AF 26 kDa subunit isoform 2 [Homo sapiens] ;gi|94536809|ref|NP_001035515.1|//splicing factor U2AF 26 kDa subunit isoform 1 [Homo sapiens]
51020	1615	609.035	879.542	0.530227	1.66e-11	*	8.08e-13	HDDC2	GO:0070062//extracellular vesicular exosome;GO:0005739//mitochondrion	GO:0005515//protein binding	GO:0008152//metabolic process	K07023//putative hydrolases of HD superfamily	gi|116875826|ref|NP_057147.2|//HD domain-containing protein 2 [Homo sapiens]
55323	1333	778.847	1124.3	0.529619	1.47e-15	*	4.63e-17	LARP6	GO:0005634//nucleus;GO:0030529//ribonucleoprotein complex;GO:0005737//cytoplasm;GO:0019013//viral nucleocapsid	GO:0003723//RNA binding;GO:0000166//nucleotide binding	GO:0006396//RNA processing;GO:0006417//regulation of translation	K18733//la-related protein 6	gi|37537710|ref|NP_060827.2|//la-related protein 6 isoform 1 [Homo sapiens];gi|37537706|ref|NP_932062.1|//la-related protein 6 isoform 2 [Homo sapiens];gi|297697002|ref|XP_002825664.1|//PREDICTED: la-related protein 6 isoform X1 [Pongo abelii]
58472	1880	107.223	154.781	0.529611	0.00446937	*	0.000951409	SQRDL	GO:0005743//mitochondrial inner membrane	GO:0070224//sulfide:quinone oxidoreductase activity;GO:0048038//quinone binding	GO:0034641//cellular nitrogen compound metabolic process;GO:0000098//sulfur amino acid catabolic process;GO:0070221//sulfide oxidation, using sulfide:quinone oxidoreductase	K17218//sulfide:quinone oxidoreductase [EC:1.8.5.-]	gi|10864011|ref|NP_067022.1|//sulfide:quinone oxidoreductase, mitochondrial [Homo sapiens]
54752	1369	0.954586	1.37787	0.52949	0.214115	*	0.0870013	FNDC8	GO:0005634//nucleus	NA	NA	K12018//tripartite motif-containing protein 42	gi|8922138|ref|NP_060029.1|//fibronectin type III domain-containing protein 8 [Homo sapiens]
54839	3075	78.7749	113.675	0.529106	0.0132139	*	0.00322875	LRRC49	GO:0005874//microtubule;GO:0005737//cytoplasm	NA	NA	K16606//leucine-rich repeat-containing protein 49	gi|312222716|ref|NP_001185946.1|//leucine-rich repeat-containing protein 49 isoform 1 [Homo sapiens];gi|547235063|ref|NP_001271286.1|//leucine-rich repeat-containing protein 49 isoform 4 [Homo sapiens];gi|312222719|ref|NP_001185947.1|//leucine-rich repeat-containing protein 49 isoform 3 [Homo sapiens];gi|55743114|ref|NP_060161.2|//leucine-rich repeat-containing protein 49 isoform 2 [Homo sapiens]…
55113	2810	118.125	170.398	0.528594	0.00274368	*	0.000550659	XKR8	GO:0016021//integral component of membrane;GO:0005886//plasma membrane	NA	NA	K01128//sphingomyelin phosphodiesterase acid-like 3 [EC:3.1.4.-]	gi|767904884|ref|XP_011539981.1|//PREDICTED: XK-related protein 8 isoform X1 [Homo sapiens];gi|24431977|ref|NP_060523.2|//XK-related protein 8 [Homo sapiens];gi|767904886|ref|XP_011539982.1|//PREDICTED: XK-related protein 8 isoform X2 [Homo sapiens]
158326	9731	0.949299	1.36846	0.527617	0.215508	*	0.0877208	FREM1	GO:0016021//integral component of membrane;GO:0005604//basement membrane	GO:0030246//carbohydrate binding;GO:0046872//metal ion binding	GO:0007160//cell-matrix adhesion;GO:0007154//cell communication;GO:0097094//craniofacial suture morphogenesis	K08115//chondroitin sulfate proteoglycan 4;K10061//C-type lectin superfamily 4 member G;K17513//C-type lectin superfamily 17 member A	gi|767954565|ref|XP_011516057.1|//PREDICTED: FRAS1-related extracellular matrix protein 1 isoform X6 [Homo sapiens];gi|122056683|ref|NP_659403.4|//FRAS1-related extracellular matrix protein 1 isoform 1 precursor [Homo sapiens];gi|767954574|ref|XP_011516060.1|//PREDICTED: FRAS1-related extracellular matrix protein 1 isoform X11 [Homo sapiens];gi|767954558|ref|XP_011516054.1|//PREDICTED: FRAS1-rela…
6799	1049	32.9578	47.4874	0.526924	0.141481	*	0.0515987	SULT1A2	GO:0005829//cytosol	GO:0004062//aryl sulfotransferase activity;GO:0005515//protein binding;GO:0047894//flavonol 3-sulfotransferase activity	GO:0008202//steroid metabolic process;GO:0009309//amine biosynthetic process;GO:0051923//sulfation;GO:0006805//xenobiotic metabolic process;GO:0006584//catecholamine metabolic process;GO:0050427//3'-phosphoadenosine 5'-phosphosulfate metabolic process	K01014//aryl sulfotransferase [EC:2.8.2.1]	gi|288558827|sp|P50226.2|ST1A2_HUMAN//RecName: Full=Sulfotransferase 1A2; Short=ST1A2; AltName: Full=Aryl sulfotransferase 2; AltName: Full=Phenol sulfotransferase 2; AltName: Full=Phenol-sulfating phenol sulfotransferase 2; Short=P-PST 2;gi|767988745|ref|XP_011544226.1|//PREDICTED: sulfotransferase 1A2 isoform X3 [Homo sapiens];gi|4507303|ref|NP_001045.1|//sulfotransferase 1A2 [Homo sapiens]
617	1579	482.174	694.615	0.526659	5.6e-10	*	3.28e-11	BCS1L	GO:0005750//mitochondrial respiratory chain complex III	GO:0005515//protein binding;GO:0005524//ATP binding	GO:0032981//mitochondrial respiratory chain complex I assembly;GO:0033617//mitochondrial respiratory chain complex IV assembly;GO:0034551//mitochondrial respiratory chain complex III assembly	K08900//mitochondrial chaperone BCS1	gi|4757852|ref|NP_004319.1|//mitochondrial chaperone BCS1 isoform a [Homo sapiens];gi|974005391|ref|NP_001305765.1|//mitochondrial chaperone BCS1 isoform b [Homo sapiens]
255488	4697	1.22122	1.75894	0.526385	0.284754	*	0.125934	RNF144B	GO:0000151//ubiquitin ligase complex;GO:0005829//cytosol;GO:0016021//integral component of membrane;GO:0031966//mitochondrial membrane	GO:0061630//ubiquitin protein ligase activity;GO:0008270//zinc ion binding;GO:0016874//ligase activity;GO:0031624//ubiquitin conjugating enzyme binding	GO:0042787//protein ubiquitination involved in ubiquitin-dependent protein catabolic process;GO:0006915//apoptotic process	K11975//E3 ubiquitin-protein ligase RNF144 [EC:2.3.2.27]	gi|50284696|ref|NP_877434.2|//E3 ubiquitin-protein ligase RNF144B [Homo sapiens];gi|530381741|ref|XP_005249043.1|//PREDICTED: E3 ubiquitin-protein ligase RNF144B isoform X2 [Homo sapiens]
196410	1531	59.1102	85.1358	0.526359	0.033211	*	0.00931787	METTL7B	GO:0005737//cytoplasm	GO:0008757//S-adenosylmethionine-dependent methyltransferase activity	NA	NA	gi|37182139|gb|AAQ88872.1|//DILV594 [Homo sapiens]
6094	1894	125.416	180.581	0.525917	0.0024633	*	0.000487804	ROM1	GO:0005887//integral component of plasma membrane;GO:0042622//photoreceptor outer segment membrane	NA	GO:0007155//cell adhesion;GO:0007601//visual perception	K17344//rod outer segment membrane protein 1	gi|4506575|ref|NP_000318.1|//rod outer segment membrane protein 1 [Homo sapiens]
148641	3127	10.4808	15.0875	0.52561	0.338526	*	0.157365	SLC35F3	GO:0016021//integral component of membrane	NA	GO:0006810//transport	K15288//solute carrier family 35, member F3/4	gi|119590397|gb|EAW69991.1|//solute carrier family 35, member F3 [Homo sapiens];gi|397508155|ref|XP_003824534.1|//PREDICTED: putative thiamine transporter SLC35F3 isoform X1 [Pan paniscus]
2878	1779	606.416	872.892	0.525496	1.93e-12	*	8.47e-14	GPX3	GO:0070062//extracellular vesicular exosome;GO:0005615//extracellular space	GO:0004602//glutathione peroxidase activity;GO:0008430//selenium binding;GO:0008134//transcription factor binding	GO:0006982//response to lipid hydroperoxide;GO:0051289//protein homotetramerization;GO:0042744//hydrogen peroxide catabolic process;GO:0055114//oxidation-reduction process	K00432//glutathione peroxidase [EC:1.11.1.9]	gi|6006001|ref|NP_002075.2|//glutathione peroxidase 3 precursor [Homo sapiens]
4804	3420	7.50047	10.7902	0.524672	0.382522	*	0.185629	NGFR	GO:0005654//nucleoplasm;GO:0009897//external side of plasma membrane;GO:0005635//nuclear envelope;GO:0005791//rough endoplasmic reticulum;GO:0045334//clathrin-coated endocytic vesicle;GO:0043204//perikaryon;GO:0005768//endosome;GO:0045121//membrane raft;GO:0032590//dendrite membrane;GO:0005887//integral component of plasma membrane;GO:0005794//Golgi apparatus;GO:0005829//cytosol;GO:0005576//extra…	GO:0001540//beta-amyloid binding;GO:0005168//neurotrophin TRKA receptor binding;GO:0070678//preprotein binding;GO:0031625//ubiquitin protein ligase binding;GO:0048406//nerve growth factor binding;GO:0005031//tumor necrosis factor-activated receptor activity;GO:0017137//Rab GTPase binding	GO:0010468//regulation of gene expression;GO:0043588//skin development;GO:0045786//negative regulation of cell cycle;GO:0048011//neurotrophin TRK receptor signaling pathway;GO:0042593//glucose homeostasis;GO:0051799//negative regulation of hair follicle development;GO:0042488//positive regulation of odontogenesis of dentin-containing tooth;GO:0031293//membrane protein intracellular domain proteol…	K02583//nerve growth factor receptor (TNFR superfamily member 16)	gi|4505393|ref|NP_002498.1|//tumor necrosis factor receptor superfamily member 16 precursor [Homo sapiens]
100128988	2003	11.6028	16.6904	0.524542	0.340526	*	0.158667	LOC100128988	NA	NA	NA	K09228//KRAB domain-containing zinc finger protein	gi|970598238|ref|NP_001305125.1|//uncharacterized protein LOC100128988 isoform 1 [Homo sapiens];gi|970598228|ref|NP_001305126.1|//uncharacterized protein LOC100128988 isoform 2 [Homo sapiens]
255783	849	288.015	414.033	0.523605	2.05e-06	*	2.1e-07	INAFM1	GO:0016021//integral component of membrane	NA	NA	NA	gi|333609239|ref|NP_848606.3|//putative transmembrane protein INAFM1 [Homo sapiens]
120224	2207	9.56356	13.7387	0.522624	0.364928	*	0.174035	TMEM45B	GO:0016021//integral component of membrane	NA	NA	NA	gi|20270331|ref|NP_620143.1|//transmembrane protein 45B [Homo sapiens]
170679	913	23.46	33.6954	0.522353	0.18759	*	0.0736728	PSORS1C1	NA	NA	NA	NA	gi|296040509|ref|NP_054787.2|//psoriasis susceptibility 1 candidate gene 1 protein [Homo sapiens]
119395	1699	36.1509	51.9209	0.522284	0.106469	*	0.0366802	CALHM3	GO:0005887//integral component of plasma membrane	GO:0005261//cation channel activity	NA	K19740//null	gi|193211395|ref|NP_001123214.1|//calcium homeostasis modulator protein 3 [Homo sapiens]
59348	2436	33.1465	47.5922	0.521866	0.129413	*	0.046191	ZNF350	GO:0005654//nucleoplasm;GO:0017053//transcriptional repressor complex;GO:0016363//nuclear matrix	GO:0046872//metal ion binding;GO:0005515//protein binding;GO:0001162//RNA polymerase II intronic transcription regulatory region sequence-specific DNA binding;GO:0001227//RNA polymerase II transcription regulatory region sequence-specific DNA binding transcription factor activity involved in negative regulation of transcription	GO:0045892//negative regulation of transcription, DNA-templated	K09228//KRAB domain-containing zinc finger protein	gi|59710107|ref|NP_067645.3|//zinc finger protein 350 [Homo sapiens]
162333	3229	2.18468	3.1363	0.521643	0.38772	*	0.18929	2017-03-10	NA	GO:0005515//protein binding;GO:0008270//zinc ion binding;GO:0016874//ligase activity	GO:0016567//protein ubiquitination	K10665//E3 ubiquitin-protein ligase MARCH10 [EC:2.3.2.27]	gi|578830497|ref|XP_005257157.2|//PREDICTED: probable E3 ubiquitin-protein ligase MARCH10 isoform X5 [Homo sapiens];gi|767993826|ref|XP_011522739.1|//PREDICTED: probable E3 ubiquitin-protein ligase MARCH10 isoform X7 [Homo sapiens];gi|571026626|ref|NP_001275709.1|//probable E3 ubiquitin-protein ligase MARCH10 isoform 3 [Homo sapiens];gi|154937340|ref|NP_689811.2|//probable E3 ubiquitin-protein li…
4321	1881	6.82483	9.78714	0.520095	0.399563	*	0.196923	MMP12	GO:0005578//proteinaceous extracellular matrix	GO:0004252//serine-type endopeptidase activity;GO:0004222//metalloendopeptidase activity;GO:0005509//calcium ion binding;GO:0008270//zinc ion binding	GO:0006508//proteolysis;GO:0035313//wound healing, spreading of epidermal cells;GO:0060054//positive regulation of epithelial cell proliferation involved in wound healing	K01413//matrix metalloproteinase-12 (macrophage elastase) [EC:3.4.24.65]	gi|73858572|ref|NP_002417.2|//macrophage metalloelastase preproprotein [Homo sapiens]
51143	2517	645.543	925.618	0.519904	2.29e-13	*	9.15e-15	DYNC1LI1	GO:0000922//spindle pole;GO:0005654//nucleoplasm;GO:0005874//microtubule;GO:0005868//cytoplasmic dynein complex;GO:0005813//centrosome;GO:0000777//condensed chromosome kinetochore;GO:0005737//cytoplasm;GO:0005886//plasma membrane	GO:0005524//ATP binding;GO:0019003//GDP binding;GO:0003777//microtubule motor activity;GO:0005525//GTP binding;GO:0045504//dynein heavy chain binding	GO:0006810//transport;GO:0090267//positive regulation of mitotic cell cycle spindle assembly checkpoint;GO:0051301//cell division;GO:0019048//modulation by virus of host morphology or physiology	K10416//dynein light intermediate chain 1, cytosolic	gi|166795297|ref|NP_057225.2|//cytoplasmic dynein 1 light intermediate chain 1 [Homo sapiens]
64840	1966	394.604	565.78	0.519834	1.69e-08	*	1.25e-09	PORCN	GO:0030176//integral component of endoplasmic reticulum membrane;GO:0016021//integral component of membrane;GO:0032281//alpha-amino-3-hydroxy-5-methyl-4-isoxazolepropionic acid selective glutamate receptor complex	GO:1990698//null;GO:0017147//Wnt-protein binding	GO:0009100//glycoprotein metabolic process;GO:0016055//Wnt signaling pathway	K00181//porcupine	gi|119571164|gb|EAW50779.1|//porcupine homolog (Drosophila), isoform CRA_c [Homo sapiens];gi|45439333|ref|NP_982300.1|//protein-serine O-palmitoleoyltransferase porcupine isoform C [Homo sapiens];gi|45439331|ref|NP_982299.1|//protein-serine O-palmitoleoyltransferase porcupine isoform B [Homo sapiens];gi|119571166|gb|EAW50781.1|//porcupine homolog (Drosophila), isoform CRA_e [Homo sapiens];gi|4543…
54896	2194	247.356	354.528	0.519312	1.89e-05	*	2.3e-06	PQLC2	GO:0005765//lysosomal membrane;GO:0031301//integral component of organelle membrane	GO:0015189//L-lysine transmembrane transporter activity;GO:0015181//arginine transmembrane transporter activity	GO:0080144//amino acid homeostasis;GO:0015819//lysine transport;GO:0015809//arginine transport	K05543//tRNA-dihydrouridine synthase 2 [EC:1.3.1.91];K03247//translation initiation factor 3 subunit H	gi|92110023|ref|NP_001035215.1|//lysosomal amino acid transporter 1 homolog isoform 2 [Homo sapiens];gi|92110021|ref|NP_001035214.1|//lysosomal amino acid transporter 1 homolog isoform 1 [Homo sapiens];gi|566559933|ref|NP_001274460.1|//lysosomal amino acid transporter 1 homolog isoform 3 [Homo sapiens];gi|767904782|ref|XP_011539936.1|//PREDICTED: lysosomal amino acid transporter 1 homolog isoform…
105376335	926	2.45855	3.52297	0.518984	0.408565	*	0.202784	LOC105376335	NA	NA	NA	NA	gi|767959579|ref|XP_011517586.1|//PREDICTED: serine/arginine repetitive matrix protein 1-like isoform X2 [Homo sapiens]
5001	1964	572.358	820.094	0.518871	7.77e-12	*	3.61e-13	ORC5	GO:0000784//nuclear chromosome, telomeric region;GO:0005654//nucleoplasm;GO:0005664//nuclear origin of replication recognition complex;GO:0005737//cytoplasm	GO:0003688//DNA replication origin binding;GO:0005515//protein binding;GO:0005524//ATP binding	GO:0000075//cell cycle checkpoint;GO:0000082//G1/S transition of mitotic cell cycle;GO:0006270//DNA replication initiation;GO:0000084//mitotic S phase	K02607//origin recognition complex subunit 5	gi|4505525|ref|NP_002544.1|//origin recognition complex subunit 5 isoform 1 [Homo sapiens];gi|32454754|ref|NP_859531.1|//origin recognition complex subunit 5 isoform 2 [Homo sapiens];gi|767947951|ref|XP_011514575.1|//PREDICTED: origin recognition complex subunit 5 isoform X1 [Homo sapiens]
79005	2046	941.43	1348.61	0.518544	6.67e-13	*	2.79e-14	SCNM1	GO:0005730//nucleolus;GO:0016607//nuclear speck	GO:0046872//metal ion binding;GO:0019899//enzyme binding	GO:0006397//mRNA processing;GO:0008380//RNA splicing	NA	gi|325651996|ref|NP_001191777.1|//TNFAIP8L2-SCNM1 protein [Homo sapiens];gi|13128998|ref|NP_076946.1|//sodium channel modifier 1 isoform 1 [Homo sapiens]
80709	5393	454.146	650.419	0.518213	1.01e-09	*	6.15e-11	AKNA	GO:0016020//membrane;GO:0005634//nucleus	GO:0000978//RNA polymerase II core promoter proximal region sequence-specific DNA binding;GO:0001077//RNA polymerase II core promoter proximal region sequence-specific DNA binding transcription factor activity involved in positive regulation of transcription	GO:0006355//regulation of transcription, DNA-templated	NA	gi|530391646|ref|XP_005252305.1|//PREDICTED: AT-hook-containing transcription factor isoform X2 [Homo sapiens];gi|151301137|ref|NP_110394.3|//AT-hook-containing transcription factor isoform 1 [Homo sapiens];gi|52222839|gb|AAU34187.1|//AKNA transcript B1 [Homo sapiens];gi|767958390|ref|XP_011517366.1|//PREDICTED: AT-hook-containing transcription factor isoform X7 [Homo sapiens];gi|767958395|ref|XP…
191585	10009	4.51042	6.45759	0.517735	0.425812	*	0.214512	PLAC4	NA	NA	NA	NA	gi|121949815|ref|NP_878252.2|//placenta-specific protein 4 [Homo sapiens]
991	1697	4663.52	6675.28	0.517409	3.8e-54	*	1.49e-56	CDC20	GO:0000922//spindle pole;GO:0005654//nucleoplasm;GO:0005829//cytosol;GO:0005813//centrosome;GO:0005680//anaphase-promoting complex;GO:0048471//perinuclear region of cytoplasm	GO:0010997//anaphase-promoting complex binding;GO:0097027//ubiquitin-protein transferase activator activity;GO:0008022//protein C-terminus binding;GO:0042826//histone deacetylase binding	GO:0040020//regulation of meiosis;GO:0007094//mitotic spindle assembly checkpoint;GO:0000236//mitotic prometaphase;GO:0051437//positive regulation of ubiquitin-protein ligase activity involved in mitotic cell cycle;GO:0050773//regulation of dendrite development;GO:0051436//negative regulation of ubiquitin-protein ligase activity involved in mitotic cell cycle;GO:0051301//cell division;GO:0031145/…	K03363//cell division cycle 20, cofactor of APC complex	gi|118402582|ref|NP_001246.2|//cell division cycle protein 20 homolog [Homo sapiens]
221143	870	88.729	126.981	0.517134	0.00894858	*	0.00207335	EEF1AKMT1	GO:0070062//extracellular vesicular exosome;GO:0005737//cytoplasm	GO:0016279//protein-lysine N-methyltransferase activity;GO:0003676//nucleic acid binding	NA	NA	gi|28372547|ref|NP_777588.1|//protein-lysine N-methyltransferase N6AMT2 [Homo sapiens]
11189	4658	1.77719	2.54325	0.517076	0.379708	*	0.18353	CELF3	GO:0005634//nucleus;GO:0005737//cytoplasm	GO:0003729//mRNA binding;GO:0000166//nucleotide binding	GO:0048026//positive regulation of mRNA splicing, via spliceosome;GO:0030317//sperm motility;GO:0000381//regulation of alternative mRNA splicing, via spliceosome;GO:0007283//spermatogenesis	K13207//CUG-BP- and ETR3-like factor	gi|635104968|ref|XP_007975364.1|//PREDICTED: CUGBP Elav-like family member 3 isoform X1 [Chlorocebus sabaeus];gi|289547605|ref|NP_001166120.1|//CUGBP Elav-like family member 3 isoform 3 [Homo sapiens];gi|597955382|ref|NP_001278035.1|//CUGBP Elav-like family member 3 isoform 4 [Homo sapiens] ;gi|635104975|ref|XP_007975366.1|//PREDICTED: CUGBP Elav-like family member 3 isoform X3 [Chlorocebus sabae…
10534	805	508.739	727.79	0.516596	2.48e-10	*	1.4e-11	SSSCA1	NA	GO:0042802//identical protein binding	GO:0051301//cell division	K11984//U4/U6.U5 tri-snRNP-associated protein 1	gi|5453838|ref|NP_006387.1|//Sjoegren syndrome/scleroderma autoantigen 1 isoform 1 [Homo sapiens]
150356	3456	3.55058	5.07906	0.516509	0.424749	*	0.2138	CHADL	GO:0005578//proteinaceous extracellular matrix	GO:0098633//collagen fibril binding;GO:0005518//collagen binding	NA	K06248//chondroadherin	gi|768023633|ref|XP_011528234.1|//PREDICTED: chondroadherin-like protein isoform X1 [Homo sapiens];gi|768023635|ref|XP_011528235.1|//PREDICTED: chondroadherin-like protein isoform X2 [Homo sapiens];gi|768023637|ref|XP_011528236.1|//PREDICTED: chondroadherin-like protein isoform X3 [Homo sapiens];gi|194440719|ref|NP_612490.1|//chondroadherin-like protein precursor [Homo sapiens]
1846	5625	596.232	852.881	0.51647	4.34e-12	*	1.95e-13	DUSP4	GO:0005654//nucleoplasm	GO:0008330//protein tyrosine/threonine phosphatase activity;GO:0017017//MAP kinase tyrosine/serine/threonine phosphatase activity;GO:0004725//protein tyrosine phosphatase activity	GO:0034130//toll-like receptor 1 signaling pathway;GO:0035335//peptidyl-tyrosine dephosphorylation;GO:0035666//TRIF-dependent toll-like receptor signaling pathway;GO:0048011//neurotrophin TRK receptor signaling pathway;GO:0001706//endoderm formation;GO:0000188//inactivation of MAPK activity;GO:0034134//toll-like receptor 2 signaling pathway;GO:0006470//protein dephosphorylation;GO:0008063//Toll s…	K04459//dual specificity MAP kinase phosphatase [EC:3.1.3.16 3.1.3.48]	gi|16950652|ref|NP_476499.1|//dual specificity protein phosphatase 4 isoform 2 [Homo sapiens];gi|4503417|ref|NP_001385.1|//dual specificity protein phosphatase 4 isoform 1 [Homo sapiens]
8343	430	3.14636	4.49841	0.515733	0.424894	*	0.213948	HIST1H2BF	GO:0070062//extracellular vesicular exosome;GO:0005615//extracellular space;GO:0005654//nucleoplasm;GO:0005737//cytoplasm;GO:0000788//nuclear nucleosome	GO:0003677//DNA binding;GO:0046982//protein heterodimerization activity	GO:0006334//nucleosome assembly;GO:0042742//defense response to bacterium	K11252//histone H2B	gi|829934945|ref|XP_012596776.1|//PREDICTED: histone H2B type 1-like [Microcebus murinus]
55622	2927	810.729	1158.79	0.515324	1.5e-14	*	5.26e-16	TTC27	NA	NA	NA	K16531//Bardet-Biedl syndrome 4 protein;K10586//baculoviral IAP repeat-containing protein 6 (apollon) [EC:2.3.2.23]	gi|767914836|ref|XP_011531260.1|//PREDICTED: tetratricopeptide repeat protein 27 isoform X1 [Homo sapiens];gi|42476022|ref|NP_060205.3|//tetratricopeptide repeat protein 27 isoform 1 [Homo sapiens]
2570	4275	3.83644	5.4809	0.514645	0.430852	*	0.217728	GABRR2	GO:0005887//integral component of plasma membrane;GO:0030054//cell junction;GO:0034707//chloride channel complex;GO:1902711//GABA-A receptor complex;GO:0045211//postsynaptic membrane	GO:0005230//extracellular ligand-gated ion channel activity;GO:0019904//protein domain specific binding;GO:0004890//GABA-A receptor activity;GO:0005254//chloride channel activity	GO:0007214//gamma-aminobutyric acid signaling pathway;GO:0034220//ion transmembrane transport;GO:0007268//synaptic transmission;GO:0007601//visual perception	K05190//gamma-aminobutyric acid receptor subunit rho	gi|767942554|ref|XP_011534016.1|//PREDICTED: gamma-aminobutyric acid receptor subunit rho-2 isoform X2 [Homo sapiens];gi|406035350|ref|NP_002034.3|//gamma-aminobutyric acid receptor subunit rho-2 precursor [Homo sapiens];gi|767942552|ref|XP_011534015.1|//PREDICTED: gamma-aminobutyric acid receptor subunit rho-2 isoform X1 [Homo sapiens]
54627	5455	6.84183	9.76792	0.51367	0.410666	*	0.204365	MAP10	NA	NA	NA	NA	gi|149192843|ref|NP_061963.2|//microtubule-associated protein 10 [Homo sapiens]
2059	4088	388.508	554.486	0.513205	2.62e-08	*	1.99e-09	EPS8	GO:0070062//extracellular vesicular exosome;GO:0005903//brush border;GO:0005938//cell cortex;GO:0030054//cell junction;GO:0032587//ruffle membrane;GO:0014069//postsynaptic density;GO:0017146//N-methyl-D-aspartate selective glutamate receptor complex;GO:0030426//growth cone;GO:0032420//stereocilium	GO:0003779//actin binding;GO:0005070//SH3/SH2 adaptor activity;GO:0048365//Rac GTPase binding	GO:0031532//actin cytoskeleton reorganization;GO:0036336//dendritic cell migration;GO:0051764//actin crosslink formation;GO:0008344//adult locomotory behavior;GO:0051016//barbed-end actin filament capping;GO:0070358//actin polymerization-dependent cell motility;GO:0008360//regulation of cell shape;GO:0016601//Rac protein signal transduction;GO:0008283//cell proliferation;GO:0007173//epidermal gro…	K17277//epidermal growth factor receptor kinase substrate 8	gi|767971792|ref|XP_011518907.1|//PREDICTED: epidermal growth factor receptor kinase substrate 8 isoform X2 [Homo sapiens]
26589	1020	514.279	733.923	0.513077	6.16e-09	*	4.25e-10	MRPL46	GO:0005654//nucleoplasm;GO:0005762//mitochondrial large ribosomal subunit;GO:0005743//mitochondrial inner membrane;GO:0030054//cell junction	GO:0016787//hydrolase activity;GO:0003735//structural constituent of ribosome	NA	K17427//large subunit ribosomal protein L46	gi|26667177|ref|NP_071446.2|//39S ribosomal protein L46, mitochondrial [Homo sapiens]
84909	2657	406.768	580.432	0.512921	7.96e-09	*	5.62e-10	C9orf3	GO:0005730//nucleolus;GO:0005737//cytoplasm;GO:0005886//plasma membrane	GO:0008270//zinc ion binding;GO:0042277//peptide binding;GO:0070006//metalloaminopeptidase activity	GO:0006508//proteolysis;GO:0019370//leukotriene biosynthetic process	K09606//aminopeptidase O [EC:3.4.11.-]	gi|767958529|ref|XP_011517421.1|//PREDICTED: aminopeptidase O isoform X2 [Homo sapiens];gi|767958531|ref|XP_011517422.1|//PREDICTED: aminopeptidase O isoform X3 [Homo sapiens];gi|767958538|ref|XP_011517424.1|//PREDICTED: aminopeptidase O isoform X6 [Homo sapiens];gi|767958534|ref|XP_011517423.1|//PREDICTED: aminopeptidase O isoform X4 [Homo sapiens];gi|767958557|ref|XP_011517432.1|//PREDICTED: am…
10202	1429	10.1315	14.4556	0.512787	0.360294	*	0.170958	DHRS2	GO:0005759//mitochondrial matrix;GO:0070062//extracellular vesicular exosome;GO:0005635//nuclear envelope	GO:0005515//protein binding;GO:0004090//carbonyl reductase (NADPH) activity	GO:0034599//cellular response to oxidative stress;GO:0008207//C21-steroid hormone metabolic process;GO:0043066//negative regulation of apoptotic process;GO:0043011//myeloid dendritic cell differentiation;GO:0055114//oxidation-reduction process;GO:0008285//negative regulation of cell proliferation;GO:0009636//response to toxic substance	K11164//dehydrogenase/reductase SDR family member 2 [EC:1.1.-.-]	gi|33667109|ref|NP_878912.1|//dehydrogenase/reductase SDR family member 2, mitochondrial isoform 1 [Homo sapiens];gi|5031737|ref|NP_005785.1|//dehydrogenase/reductase SDR family member 2, mitochondrial isoform 2 [Homo sapiens];gi|974005341|ref|NP_001305764.1|//dehydrogenase/reductase SDR family member 2, mitochondrial isoform 3 [Homo sapiens];gi|767979509|ref|XP_011534640.1|//PREDICTED: dehydroge…
23563	3250	10.8254	15.4352	0.5118	0.354857	*	0.167293	CHST5	GO:0016021//integral component of membrane;GO:0031228//intrinsic component of Golgi membrane	GO:0001517//N-acetylglucosamine 6-O-sulfotransferase activity	GO:0018146//keratan sulfate biosynthetic process;GO:0006044//N-acetylglucosamine metabolic process;GO:0005975//carbohydrate metabolic process;GO:0006477//protein sulfation	K09670//carbohydrate 6-sulfotransferase 5 [EC:2.8.2.-]	gi|21362052|ref|NP_078809.2|//carbohydrate sulfotransferase 5 [Homo sapiens]
9141	610	1108.7	1580.33	0.511356	4.85e-16	*	1.44e-17	PDCD5	GO:0070062//extracellular vesicular exosome;GO:0005634//nucleus;GO:0005737//cytoplasm	GO:0003677//DNA binding;GO:0010698//acetyltransferase activator activity;GO:0048487//beta-tubulin binding;GO:0008201//heparin binding	NA	K06875//programmed cell death protein 5	gi|4759224|ref|NP_004699.1|//programmed cell death protein 5 [Homo sapiens]
7277	1472	3624.26	5164.87	0.511045	1.77e-46	*	8.53e-49	TUBA4A	GO:0070062//extracellular vesicular exosome;GO:0005874//microtubule;GO:0005829//cytosol;GO:0005737//cytoplasm	GO:0005200//structural constituent of cytoskeleton;GO:0005525//GTP binding;GO:0019899//enzyme binding;GO:0003924//GTPase activity	GO:0051258//protein polymerization;GO:0000226//microtubule cytoskeleton organization;GO:0002576//platelet degranulation;GO:0051084//'de novo' posttranslational protein folding;GO:0000086//G2/M transition of mitotic cell cycle;GO:0030168//platelet activation	K07374//tubulin alpha	gi|821032162|ref|XP_012355059.1|//PREDICTED: tubulin alpha-4A chain isoform X2 [Nomascus leucogenys];gi|537238658|gb|ERE86578.1|//tubulin alpha-4A chain-like protein [Cricetulus griseus];gi|6678467|ref|NP_033473.1|//tubulin alpha-4A chain isoform 1 [Mus musculus]
2817	3686	2477.49	3530.37	0.510941	3.89e-28	*	3.97e-30	GPC1	GO:0070062//extracellular vesicular exosome;GO:0005615//extracellular space;GO:0031225//anchored component of membrane;GO:0005578//proteinaceous extracellular matrix;GO:0005796//Golgi lumen;GO:0005768//endosome;GO:0045121//membrane raft;GO:0005887//integral component of plasma membrane;GO:0043202//lysosomal lumen	GO:0043395//heparan sulfate proteoglycan binding;GO:0005507//copper ion binding;GO:0017134//fibroblast growth factor binding;GO:0043236//laminin binding	GO:0030200//heparan sulfate proteoglycan catabolic process;GO:0040037//negative regulation of fibroblast growth factor receptor signaling pathway;GO:0006024//glycosaminoglycan biosynthetic process;GO:0032288//myelin assembly;GO:0014037//Schwann cell differentiation;GO:0005975//carbohydrate metabolic process;GO:2001016//positive regulation of skeletal muscle cell differentiation;GO:0007411//axon g…	K08107//glypican 1	gi|167001141|ref|NP_002072.2|//glypican-1 precursor [Homo sapiens]
115019	4351	1.78262	2.53986	0.510751	0.38494	*	0.187471	SLC26A9	GO:0070062//extracellular vesicular exosome;GO:0009986//cell surface;GO:0005887//integral component of plasma membrane;GO:0016324//apical plasma membrane	GO:0015301//anion:anion antiporter activity;GO:0019531//oxalate transmembrane transporter activity;GO:0005254//chloride channel activity;GO:0051117//ATPase binding;GO:0008271//secondary active sulfate transmembrane transporter activity;GO:0015106//bicarbonate transmembrane transporter activity	GO:0055085//transmembrane transport;GO:0006821//chloride transport;GO:0008272//sulfate transport;GO:0006885//regulation of pH	K14706//solute carrier family 26 (sulfate anion transporter), member 9	gi|217272867|ref|NP_599152.2|//solute carrier family 26 member 9 isoform b [Homo sapiens];gi|16588681|gb|AAL26867.1|AF314958_1//anion transporter/exchanger-9 [Homo sapiens]
10485	1271	1.78054	2.53585	0.510156	0.38548	*	0.187944	C1orf61	GO:0005634//nucleus	NA	NA	NA	gi|1000814573|ref|NP_001307383.1|//protein CROC-4 isoform 3 [Homo sapiens];gi|5453625|ref|NP_006356.1|//protein CROC-4 isoform 1 [Homo sapiens];gi|694889494|ref|XP_009432702.1|//PREDICTED: protein CROC-4 [Pan troglodytes];gi|767908108|ref|XP_011507369.1|//PREDICTED: protein CROC-4 isoform X2 [Homo sapiens];gi|1000814512|ref|NP_001307382.1|//protein CROC-4 isoform 2 [Homo sapiens];gi|1001184399|re…
375061	1516	61.4403	87.4876	0.509895	0.0364617	*	0.0104258	FAM89A	NA	NA	NA	NA	gi|38348390|ref|NP_940954.1|//protein FAM89A [Homo sapiens]
6627	1103	2120.41	3018.86	0.509655	9.32e-32	*	7.86e-34	SNRPA1	GO:0005654//nucleoplasm;GO:0005686//U2 snRNP;GO:0019013//viral nucleocapsid;GO:0071013//catalytic step 2 spliceosome	GO:0030620//U2 snRNA binding;GO:0005515//protein binding	GO:0000398//mRNA splicing, via spliceosome	K11092//U2 small nuclear ribonucleoprotein A'	gi|50593002|ref|NP_003081.2|//U2 small nuclear ribonucleoprotein A' [Homo sapiens]
26256	1439	247.732	352.693	0.509629	1.83e-05	*	2.2e-06	CABYR	GO:0005856//cytoskeleton;GO:0005634//nucleus;GO:0097228//sperm principal piece;GO:0005737//cytoplasm;GO:0097229//sperm end piece;GO:0035686//sperm fibrous sheath	GO:0005509//calcium ion binding;GO:0046982//protein heterodimerization activity;GO:0017124//SH3 domain binding;GO:0019899//enzyme binding	GO:0001539//cilium or flagellum-dependent cell motility;GO:0007165//signal transduction;GO:0048240//sperm capacitation	NA	gi|24797108|ref|NP_036321.2|//calcium-binding tyrosine phosphorylation-regulated protein isoform a [Homo sapiens];gi|24797118|ref|NP_722454.1|//calcium-binding tyrosine phosphorylation-regulated protein isoform e [Homo sapiens];gi|24797112|ref|NP_619585.1|//calcium-binding tyrosine phosphorylation-regulated protein isoform c [Homo sapiens];gi|24797114|ref|NP_722452.1|//calcium-binding tyrosine ph…
1198	2010	1186.69	1687.54	0.507976	1.3e-19	*	2.71e-21	CLK3	GO:0016020//membrane;GO:0045111//intermediate filament cytoskeleton;GO:0001669//acrosomal vesicle;GO:0016607//nuclear speck	GO:0004712//protein serine/threonine/tyrosine kinase activity;GO:0004713//protein tyrosine kinase activity;GO:0004674//protein serine/threonine kinase activity;GO:0005515//protein binding;GO:0005524//ATP binding	GO:0043484//regulation of RNA splicing;GO:0018108//peptidyl-tyrosine phosphorylation;GO:0046777//protein autophosphorylation	K08823//CDC-like kinase [EC:2.7.12.1]	gi|530405367|ref|XP_005254208.1|//PREDICTED: dual specificity protein kinase CLK3 isoform X3 [Homo sapiens];gi|767983239|ref|XP_011519508.1|//PREDICTED: dual specificity protein kinase CLK3 isoform X4 [Homo sapiens];gi|767983236|ref|XP_011519507.1|//PREDICTED: dual specificity protein kinase CLK3 isoform X2 [Homo sapiens];gi|194097436|ref|NP_001123500.1|//dual specificity protein kinase CLK3 isof…
7580	3416	2.47477	3.51912	0.507919	0.419886	*	0.210878	ZNF32	GO:0005634//nucleus	GO:0003677//DNA binding;GO:0046872//metal ion binding;GO:0005515//protein binding	GO:0006355//regulation of transcription, DNA-templated	K09228//KRAB domain-containing zinc finger protein	gi|795129032|ref|XP_011833962.1|//PREDICTED: zinc finger protein 32 isoform X1 [Mandrillus leucophaeus];gi|24307925|ref|NP_008904.1|//zinc finger protein 32 [Homo sapiens];gi|119607016|gb|EAW86610.1|//zinc finger protein 32 (KOX 30), isoform CRA_b [Homo sapiens]
124975	2001	8.50009	12.0865	0.507848	0.396528	*	0.194932	GGT6	GO:0070062//extracellular vesicular exosome;GO:0031362//anchored component of external side of plasma membrane;GO:0016021//integral component of membrane	GO:0036374//glutathione hydrolase activity	GO:0019370//leukotriene biosynthetic process;GO:0006750//glutathione biosynthetic process	K00681//gamma-glutamyltranspeptidase / glutathione hydrolase [EC:2.3.2.2 3.4.19.13]	gi|171543825|ref|NP_001116362.1|//gamma-glutamyltransferase 6 isoform a [Homo sapiens];gi|569026873|ref|NP_001275631.1|//gamma-glutamyltransferase 6 isoform c [Homo sapiens];gi|569026715|ref|NP_001275633.1|//gamma-glutamyltransferase 6 isoform e [Homo sapiens];gi|171543823|ref|NP_699169.2|//gamma-glutamyltransferase 6 isoform b [Homo sapiens];gi|569026718|ref|NP_001275632.1|//gamma-glutamyltransf…
56851	1075	2117.1	3010.03	0.507689	6.08e-29	*	5.85e-31	EMC7	GO:0072546//ER membrane protein complex	GO:0030246//carbohydrate binding	NA	K02941//large subunit ribosomal protein LP0	gi|9910346|ref|NP_064539.1|//ER membrane protein complex subunit 7 precursor [Homo sapiens]
81848	5635	5.21657	7.41476	0.507299	0.437174	*	0.222779	SPRY4	GO:0005925//focal adhesion;GO:0005794//Golgi apparatus;GO:0032587//ruffle membrane	GO:0005515//protein binding	GO:0007275//multicellular organismal development;GO:0043407//negative regulation of MAP kinase activity	K17385//protein sprouty homolog 4	gi|23308574|ref|NP_112226.2|//protein sprouty homolog 4 isoform 1 [Homo sapiens]
4733	1467	1209.31	1718.64	0.507091	9.07e-20	*	1.86e-21	DRG1	GO:0070062//extracellular vesicular exosome;GO:0005634//nucleus;GO:0005874//microtubule;GO:0005813//centrosome;GO:0043209//myelin sheath;GO:0048471//perinuclear region of cytoplasm;GO:0055038//recycling endosome membrane;GO:0005913//cell-cell adherens junction;GO:0005829//cytosol;GO:0005886//plasma membrane;GO:0005844//polysome	GO:0043015//gamma-tubulin binding;GO:0042802//identical protein binding;GO:0005525//GTP binding;GO:0008017//microtubule binding;GO:0008134//transcription factor binding;GO:0017137//Rab GTPase binding;GO:0045296//cadherin binding	GO:0030330//DNA damage response, signal transduction by p53 class mediator;GO:0032287//peripheral nervous system myelin maintenance;GO:0071456//cellular response to hypoxia;GO:0090232//positive regulation of spindle checkpoint;GO:0045576//mast cell activation;GO:0006351//transcription, DNA-templated;GO:0010038//response to metal ion	K06944//uncharacterized protein	gi|4758796|ref|NP_004138.1|//developmentally-regulated GTP-binding protein 1 [Homo sapiens]
64241	4362	5.9106	8.39971	0.507034	0.43378	*	0.219813	ABCG8	GO:0016324//apical plasma membrane;GO:0043190//ATP-binding cassette (ABC) transporter complex;GO:0043235//receptor complex	GO:0005524//ATP binding;GO:0042626//ATPase activity, coupled to transmembrane movement of substances;GO:0046982//protein heterodimerization activity;GO:0017127//cholesterol transporter activity	GO:0042493//response to drug;GO:0055085//transmembrane transport;GO:0007588//excretion;GO:0033344//cholesterol efflux;GO:0045796//negative regulation of intestinal cholesterol absorption;GO:0015914//phospholipid transport;GO:0007584//response to nutrient;GO:0042632//cholesterol homeostasis;GO:0010949//negative regulation of intestinal phytosterol absorption;GO:0006629//lipid metabolic process	K05684//ATP-binding cassette, subfamily G (WHITE), member 8 (sterolin 2)	gi|767915031|ref|XP_011531332.1|//PREDICTED: ATP-binding cassette sub-family G member 8 isoform X2 [Homo sapiens];gi|11967971|ref|NP_071882.1|//ATP-binding cassette sub-family G member 8 [Homo sapiens];gi|767915028|ref|XP_011531331.1|//PREDICTED: ATP-binding cassette sub-family G member 8 isoform X1 [Homo sapiens]
79144	794	2906.35	4126.55	0.505727	3.97e-06	*	4.27e-07	PPDPF	NA	NA	GO:0030154//cell differentiation;GO:0007275//multicellular organismal development	NA	gi|13236524|ref|NP_077275.1|//pancreatic progenitor cell differentiation and proliferation factor [Homo sapiens]
27338	1206	2751.2	3904.6	0.505117	8.77e-38	*	5.83e-40	UBE2S	GO:0005737//cytoplasm;GO:0005680//anaphase-promoting complex	GO:0061630//ubiquitin protein ligase activity;GO:0005524//ATP binding;GO:0031625//ubiquitin protein ligase binding;GO:0061631//ubiquitin conjugating enzyme activity	GO:0070534//protein K63-linked ubiquitination;GO:0035519//protein K29-linked ubiquitination;GO:0044314//protein K27-linked ubiquitination;GO:0070979//protein K11-linked ubiquitination;GO:0085020//protein K6-linked ubiquitination;GO:0010994//free ubiquitin chain polymerization;GO:0010458//exit from mitosis;GO:0051301//cell division;GO:0031145//anaphase-promoting complex-dependent proteasomal ubiqu…	K10583//ubiquitin-conjugating enzyme E2 S [EC:2.3.2.23]	gi|768008080|ref|XP_011525054.1|//PREDICTED: ubiquitin-conjugating enzyme E2 S isoform X1 [Homo sapiens];gi|112382377|ref|NP_055316.2|//ubiquitin-conjugating enzyme E2 S [Homo sapiens]
79148	1439	168.347	238.873	0.504804	0.000450782	*	7.45e-05	MMP28	GO:0005737//cytoplasm;GO:0005578//proteinaceous extracellular matrix	GO:0004222//metalloendopeptidase activity;GO:0005509//calcium ion binding;GO:0008270//zinc ion binding	GO:0006508//proteolysis	K08006//matrix metalloproteinase-28 (epilysin) [EC:3.4.24.-]	gi|14589912|ref|NP_116568.1|//matrix metalloproteinase-28 isoform 2 preproprotein [Homo sapiens];gi|73808271|ref|NP_001027449.1|//matrix metalloproteinase-28 isoform 3 precursor [Homo sapiens];gi|767995851|ref|XP_011523527.1|//PREDICTED: matrix metalloproteinase-28 isoform X1 [Homo sapiens];gi|767995861|ref|XP_011523532.1|//PREDICTED: matrix metalloproteinase-28 isoform X3 [Homo sapiens];gi|13236…
10411	3829	32.5896	46.2206	0.504123	0.168555	*	0.0643956	RAPGEF3	GO:0031090//organelle membrane;GO:0031526//brush border membrane;GO:0043025//neuronal cell body;GO:0012505//endomembrane system;GO:0030426//growth cone;GO:0030864//cortical actin cytoskeleton;GO:1990796//null;GO:1990795//null;GO:0070062//extracellular vesicular exosome;GO:0097470//ribbon synapse;GO:0005902//microvillus;GO:0030027//lamellipodium;GO:0048471//perinuclear region of cytoplasm;GO:00301…	GO:0030552//cAMP binding;GO:0044325//ion channel binding;GO:0019904//protein domain specific binding;GO:0017034//Rap guanyl-nucleotide exchange factor activity	GO:0008283//cell proliferation;GO:0006112//energy reserve metabolic process;GO:0030168//platelet activation;GO:0045766//positive regulation of angiogenesis;GO:0051056//regulation of small GTPase mediated signal transduction;GO:0044281//small molecule metabolic process;GO:0050796//regulation of insulin secretion	K08014//Rap guanine nucleotide exchange factor 3	gi|767972819|ref|XP_011536054.1|//PREDICTED: rap guanine nucleotide exchange factor 3 isoform X2 [Homo sapiens];gi|767972825|ref|XP_011536057.1|//PREDICTED: rap guanine nucleotide exchange factor 3 isoform X5 [Homo sapiens];gi|767972834|ref|XP_011536061.1|//PREDICTED: rap guanine nucleotide exchange factor 3 isoform X9 [Homo sapiens];gi|767972831|ref|XP_011536060.1|//PREDICTED: rap guanine nucleo…
347454	1607	29.148	41.3251	0.503623	0.174085	*	0.0668596	SOWAHD	NA	NA	NA	K10329//ankyrin repeat and SOCS box protein 7;K10799//tankyrase [EC:2.4.2.30];K12166//E3 ubiquitin-protein ligase HACE1 [EC:2.3.2.26]	gi|157743267|ref|NP_001099046.1|//ankyrin repeat domain-containing protein SOWAHD [Homo sapiens]
[truncated: 16,224 more rows]
